# Supplementary material for: Meta-Analysis of the Effects of Foods and Derived Products Containing Ellagitannins and Anthocyanins on Cardiometabolic Biomarkers: Analysis of Factors Influencing Variability of the Individual Responses
Source: MDPI journal article supplement (doi:10.3390/ijms19030694), 2018-02-28

**Supplementary Figure S1.-** Forest plot of the meta-analysis evaluating the effects of a prolonged supplementation with ellagitannins and anthocyanins-containing products on human BMI. A total of 51 studies (displayed in alphabetical order) were analysed. Pooled results are shown at the bottom using a random-effects model. SDM: standardized difference in means, SE: standard error, 95% CI: lower and upper confidence limits for the average SDM, RW: relative weight.

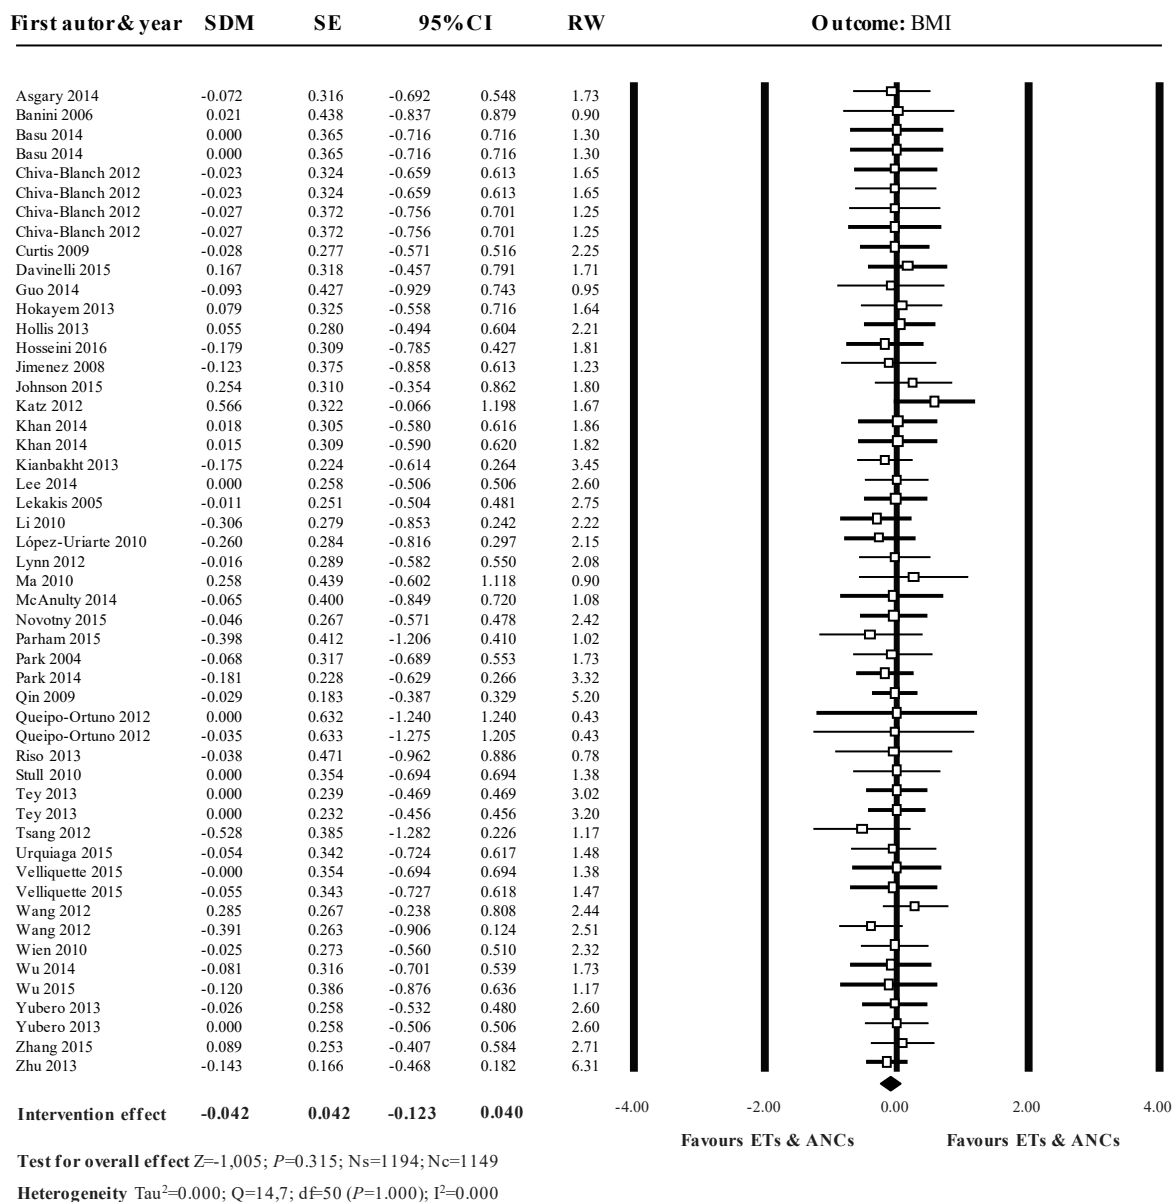

**Supplementary Figure S2.-** Forest plot of the meta-analysis evaluating the effects of a prolonged supplementation with ellagitannins and anthocyanins-containing products on human BMI. A total of 47 studies (displayed in alphabetical order) were analysed. Pooled results are shown at the bottom using a random-effects model. DM: Difference in means, SE: standard error, 95% CI: lower and upper confidence limits for the average DM, RW: relative weight.

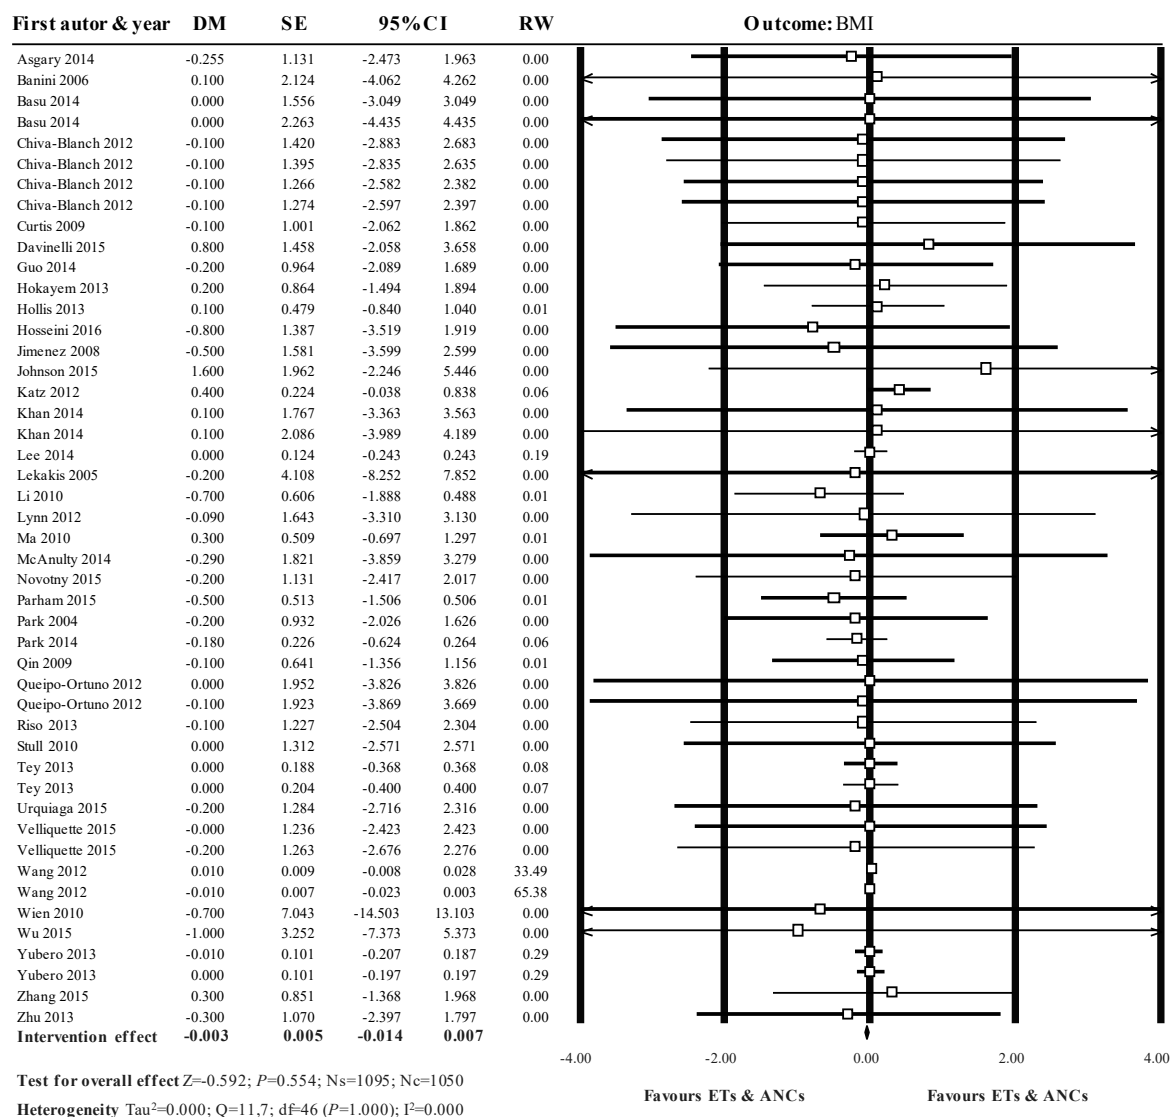

**Supplementary Figure S3.** Funnel plots and Egger statistics (intercept and 2-tailed *P*-value) of the meta-analysis evaluating the effects of a prolonged supplementation with ellagitannins and anthocyanins-containing products on human BMI.

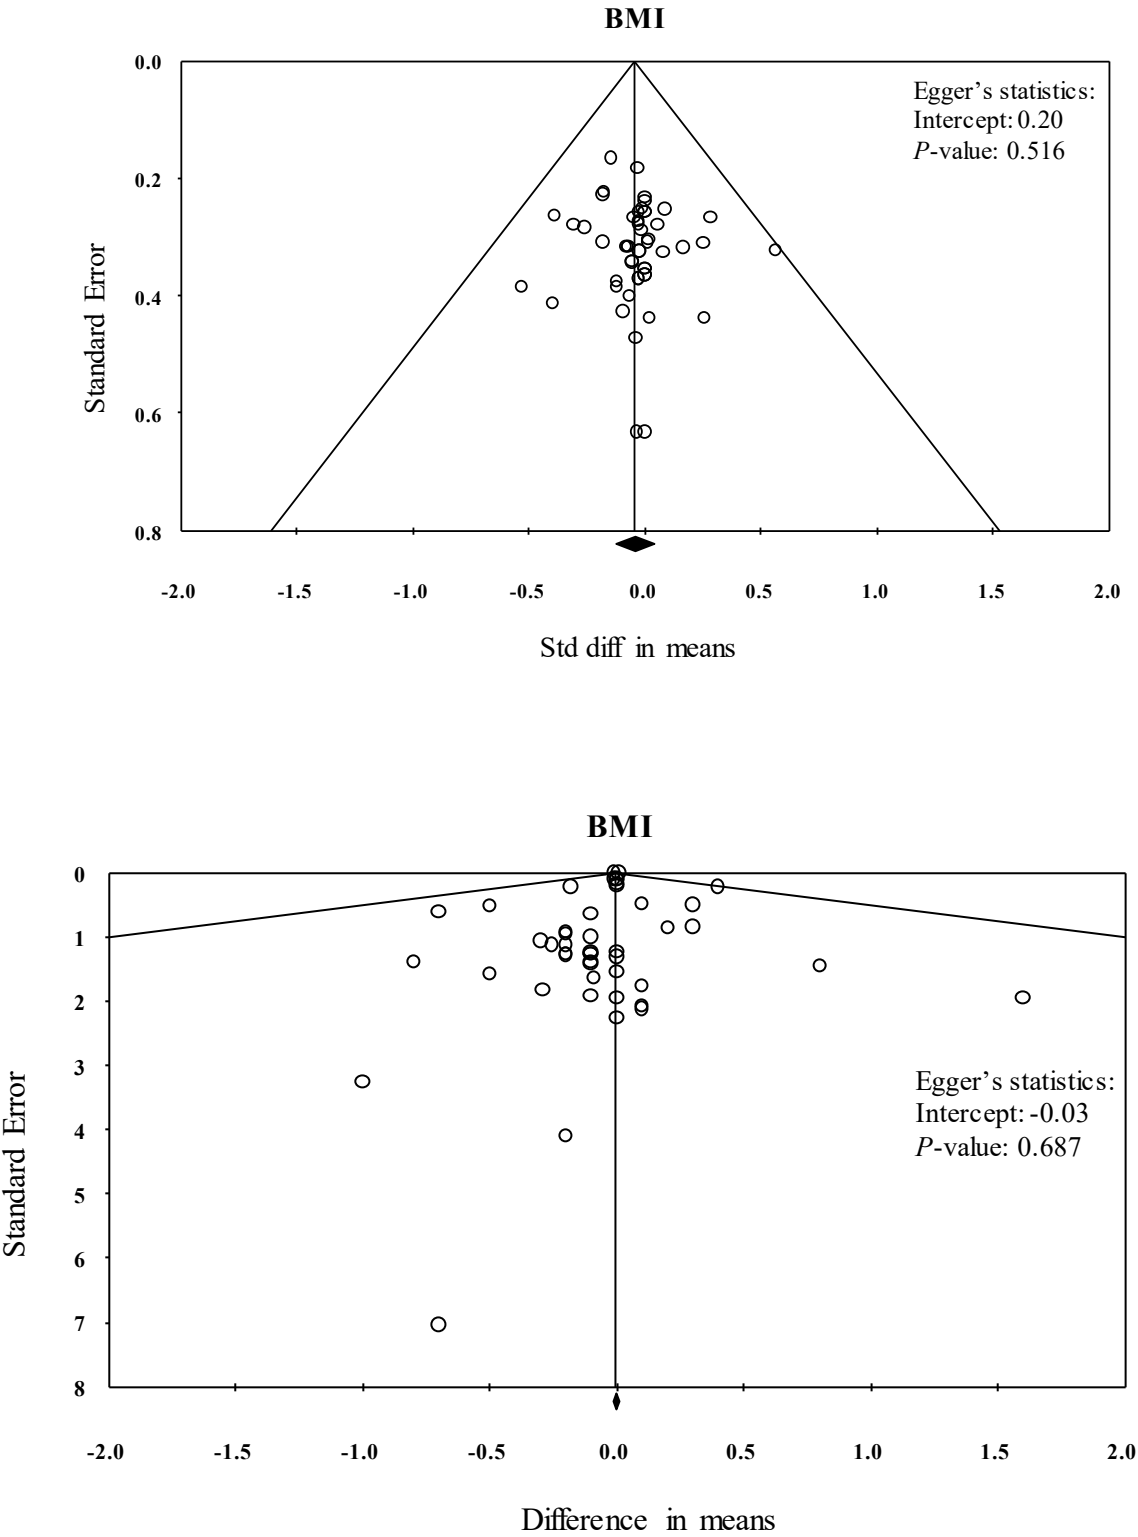

**Supplementary Figure S4.** Forest plot of the meta-analysis evaluating the effects of a prolonged supplementation with ellagitannins and anthocyanins-containing products on WC. A total of 23 studies (displayed in alphabetical order) were analysed. Pooled results are shown at the bottom using a random-effects model. SDM: standardized difference in means, SE: standard error, 95% CI: lower and upper confidence limits for the average SDM, RW: relative weight.

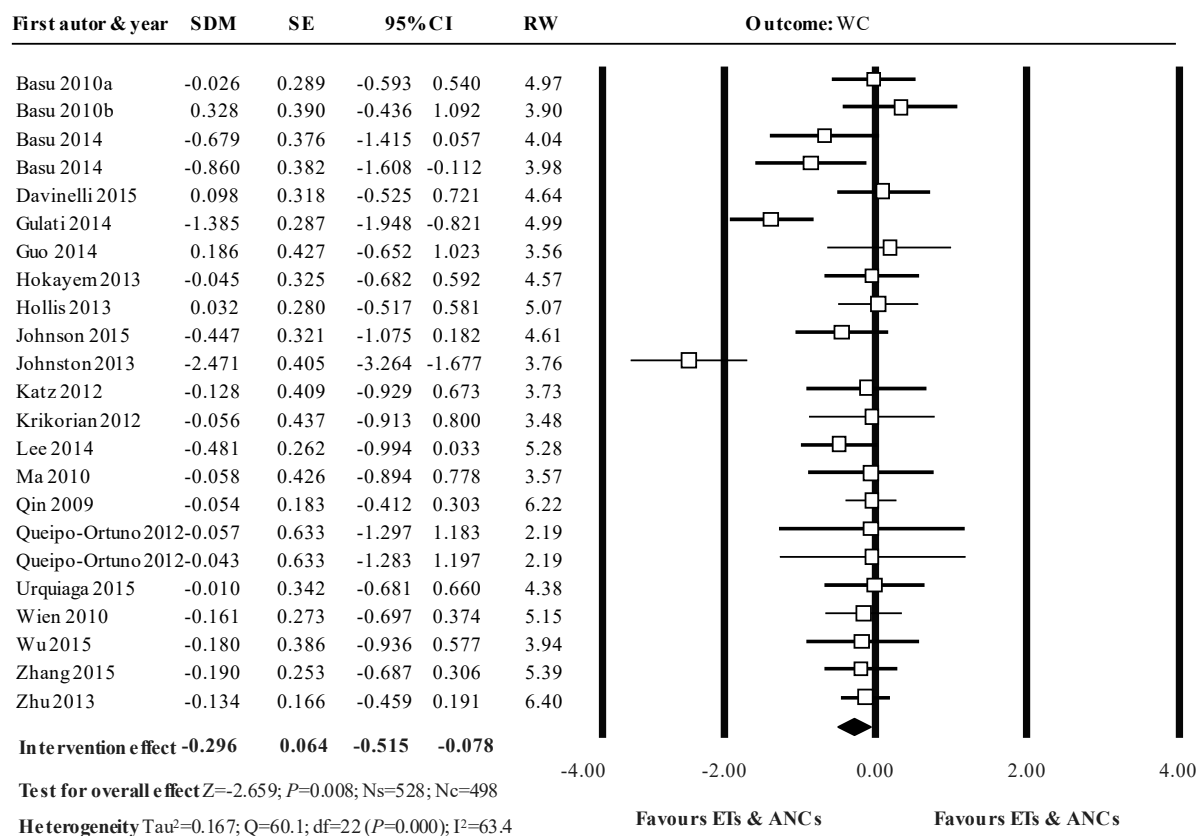

**Supplementary Figure S5.-** Forest plot of the meta-analysis evaluating the effects of a prolonged supplementation with ellagitannins and anthocyanins-containing products on human WC. A total of 22 studies (displayed in alphabetical order) were analysed. Pooled results are shown at the bottom using a random-effects model. DM: Difference in means, SE: standard error, 95% CI: lower and upper confidence limits for the average DM, RW: relative weight.

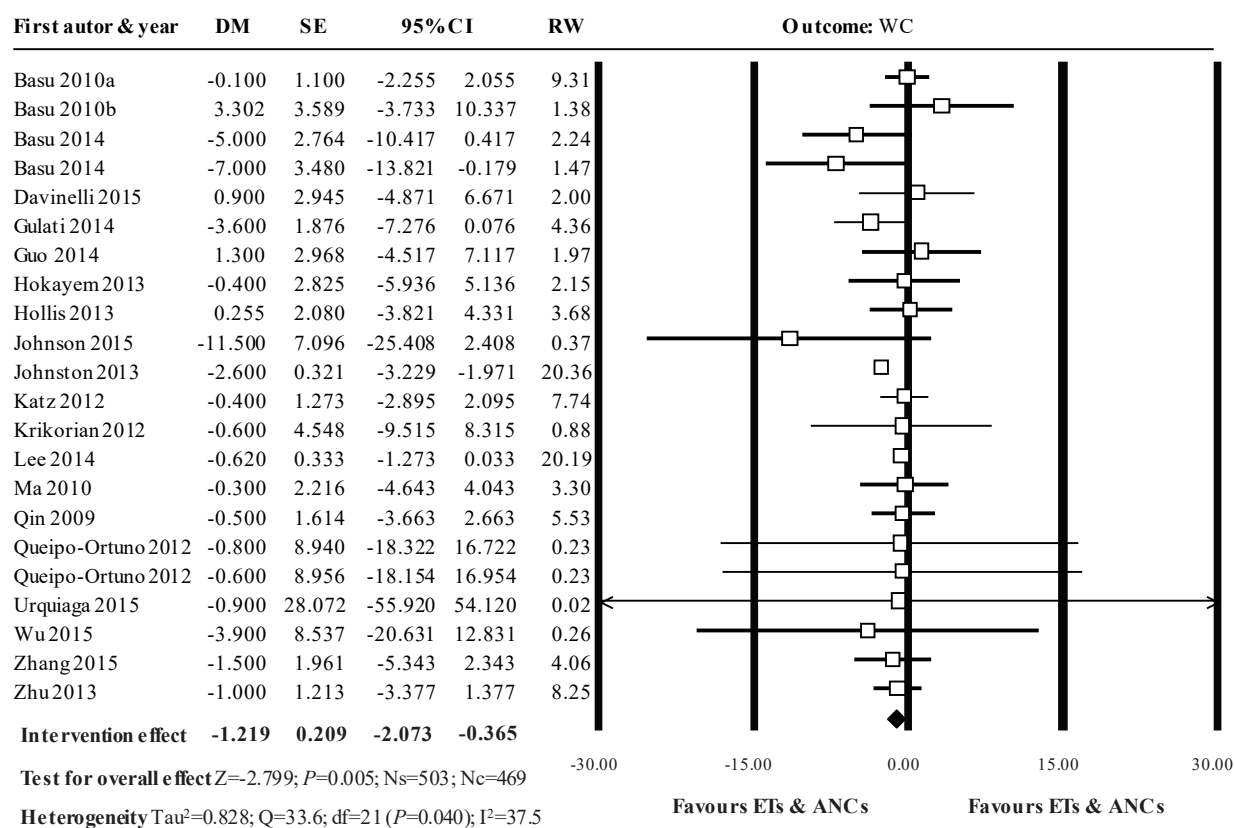

**Supplementary Figure S6.** Funnel plots and Egger statistics (intercept and 2-tailed *P*-value) of the meta-analysis evaluating the effects of a prolonged supplementation with ellagitannins and anthocyanins-containing products on waist circumference (WC).

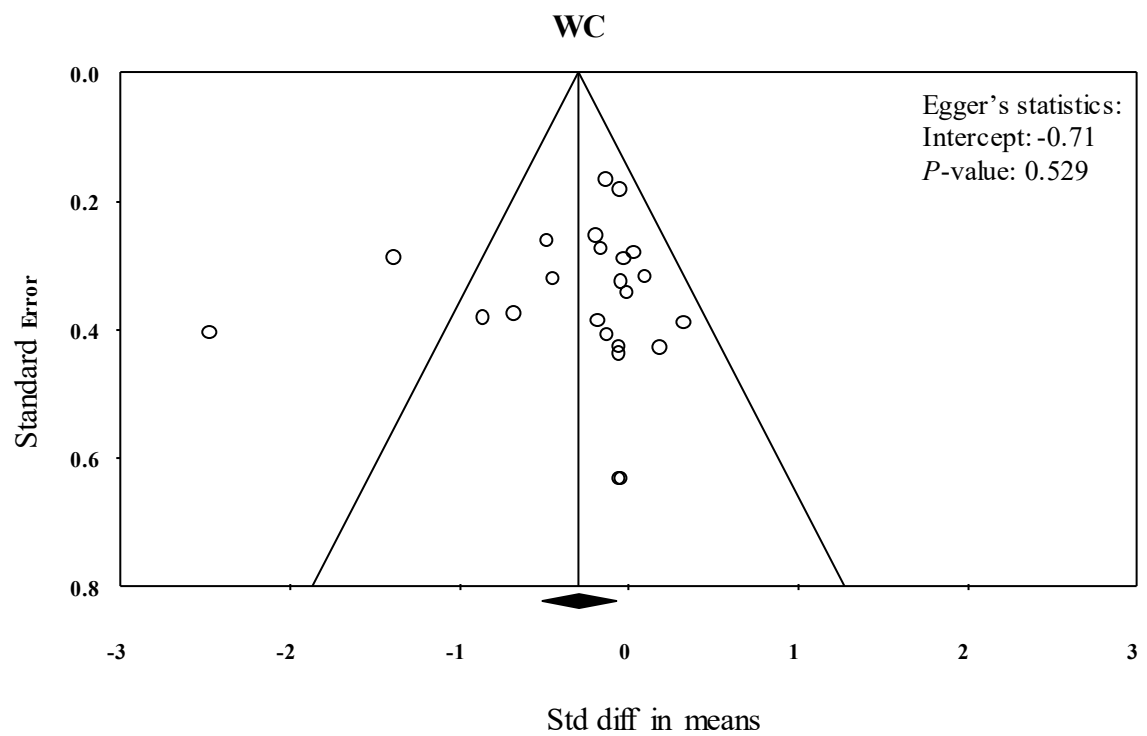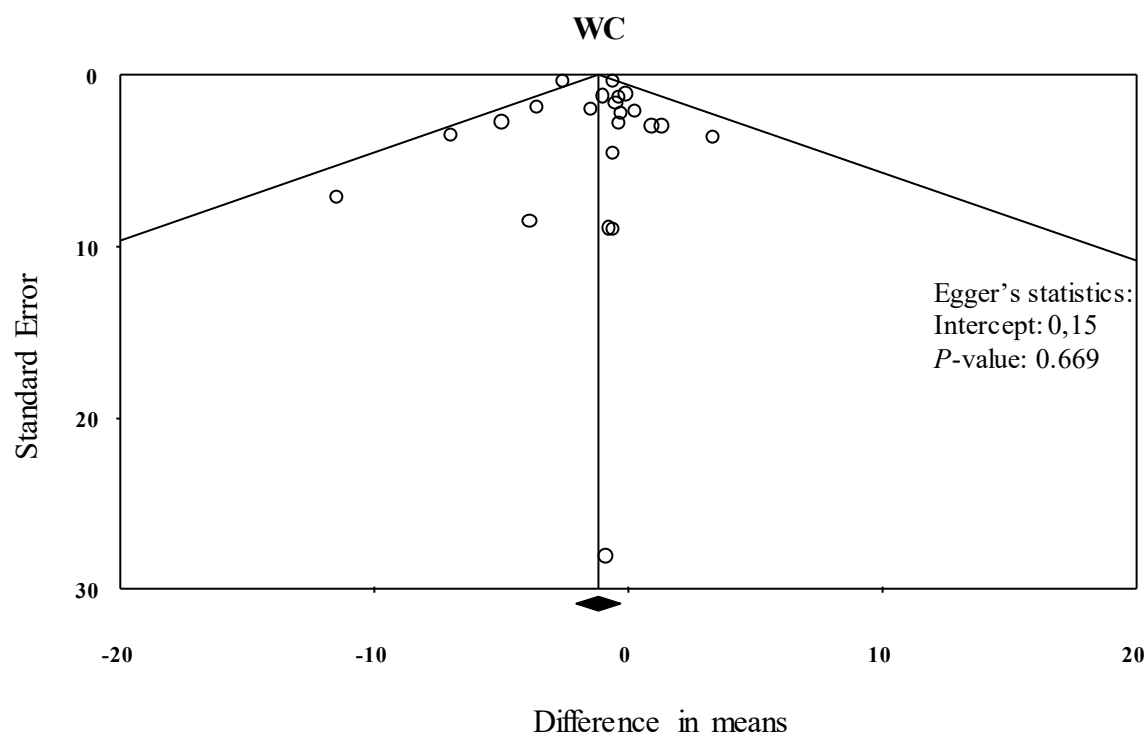

**Supplementary Figure S7.** Forest plot of the meta-analysis evaluating the effects of a prolonged supplementation with ellagitannins and anthocyanins-containing products on T-C. A total of 109 studies (displayed in alphabetical order) were analysed. Pooled results are shown at the bottom using a random-effects model. SDM: standardized difference in means, SE: standard error, 95% CI: lower and upper confidence limits for the average SDM, RW: relative weight.

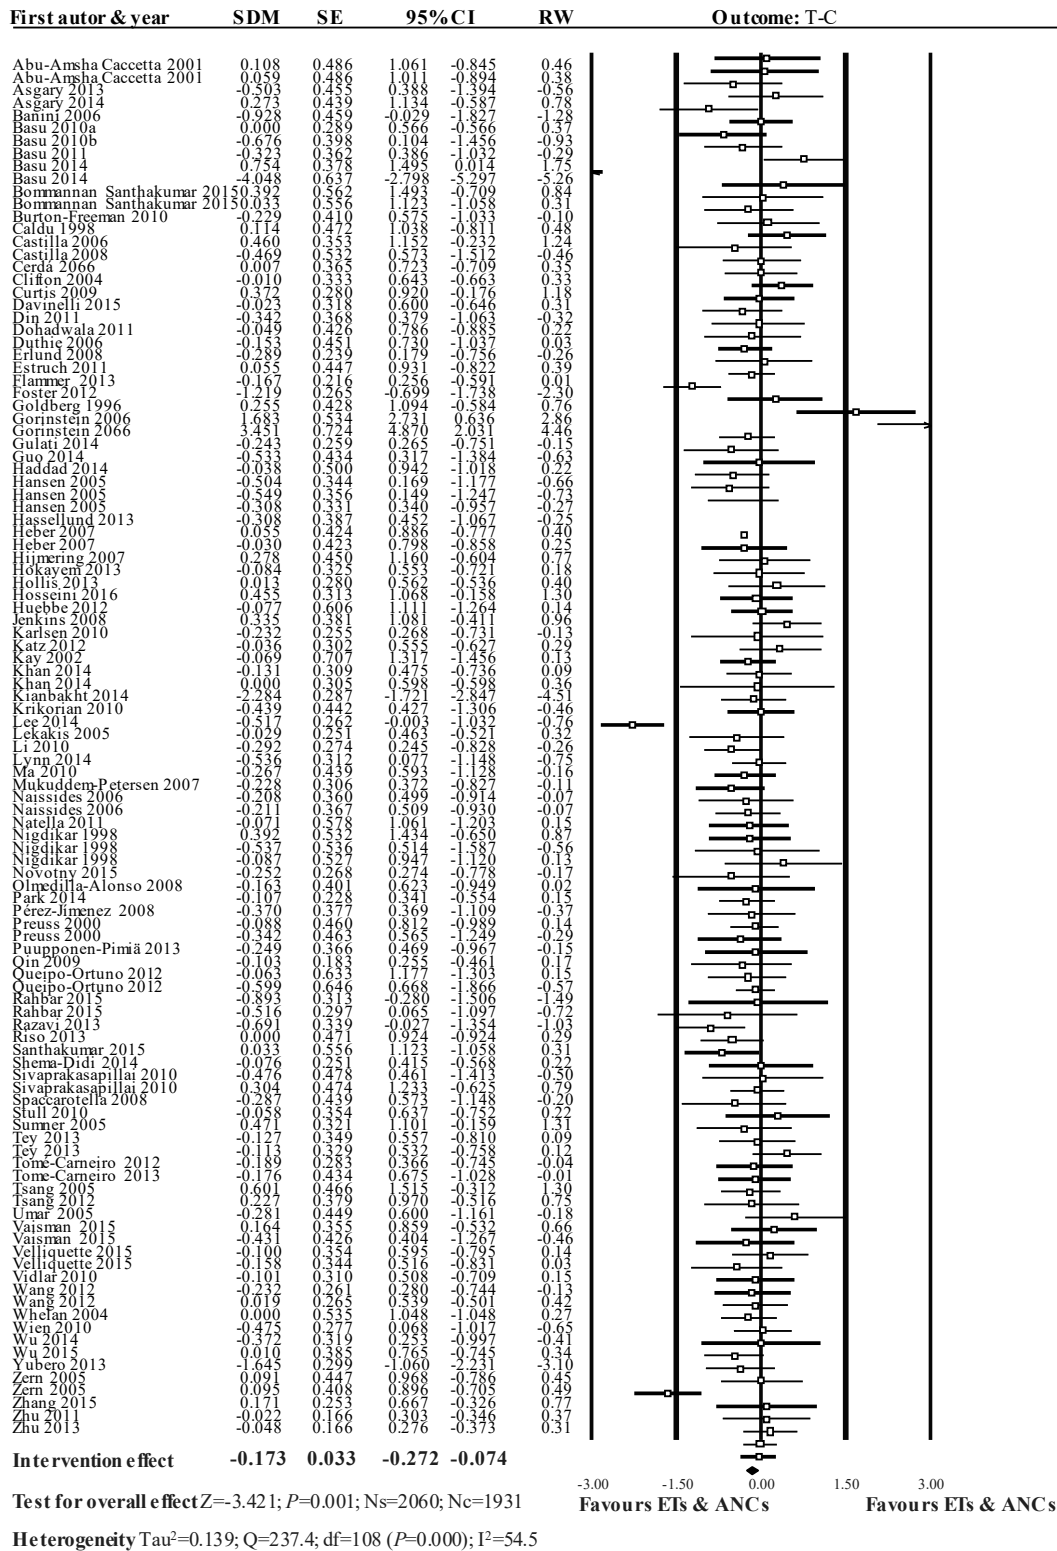

**Supplementary Figure S8.-** Forest plot of the meta-analysis evaluating the effects of a prolonged supplementation with ellagitannins and anthocyanins-containing products on T-C. A total of 103 studies (displayed in alphabetical order) were analysed. Pooled results are shown at the bottom using a random-effects model. DM: Difference in means, SE: standard error, 95% CI: lower and upper confidence limits for the average DM, RW: relative weight.

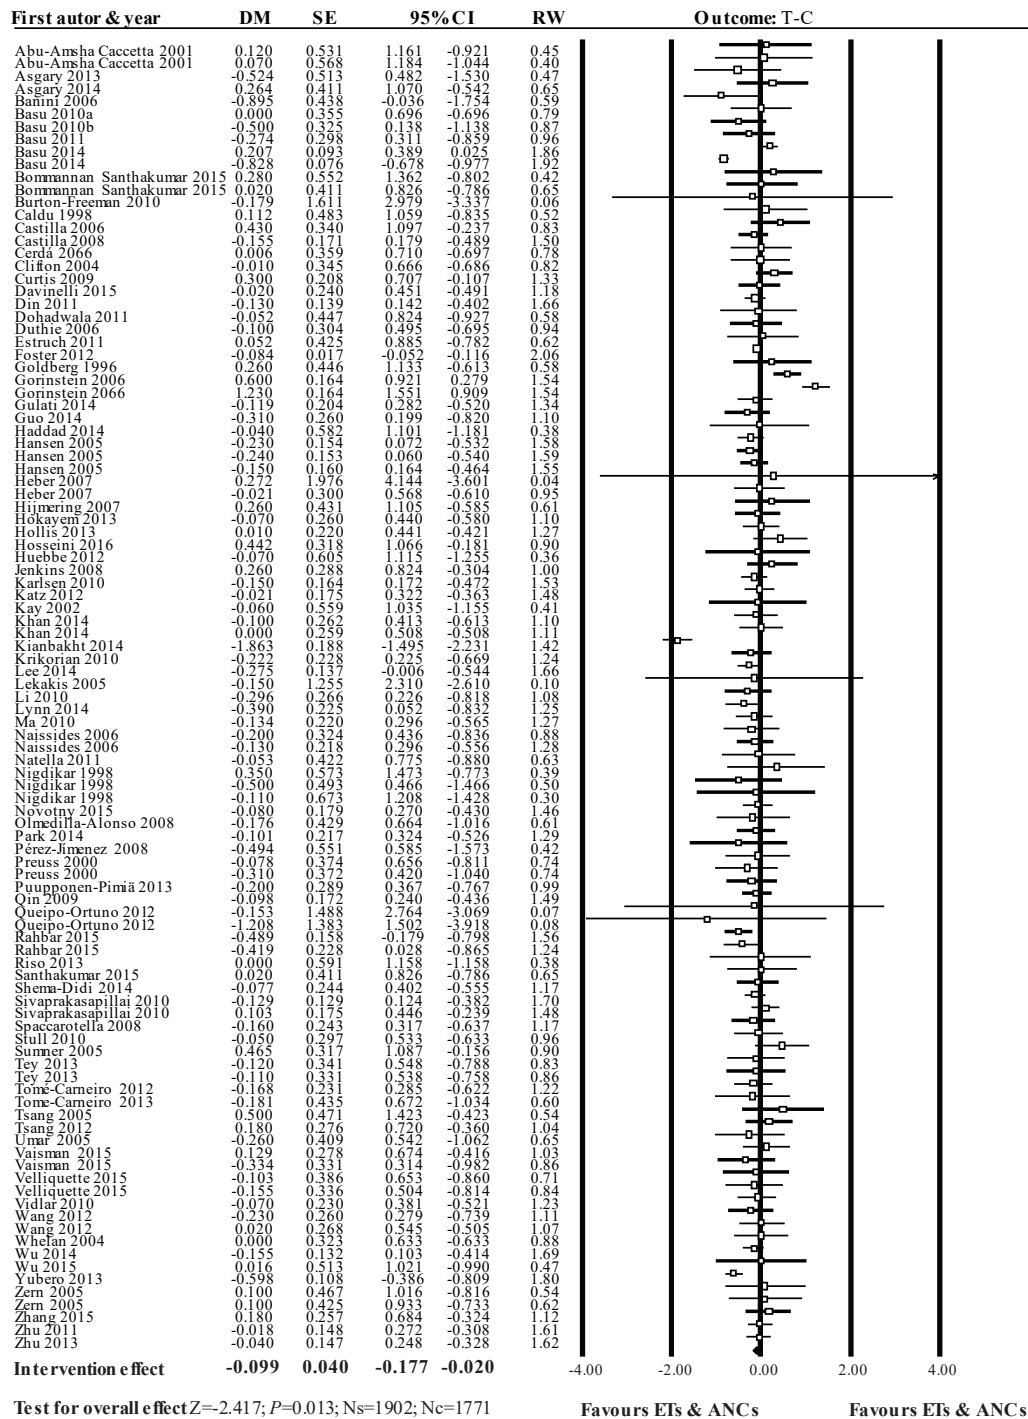



**Supplementary Figure S9.** Funnel plots and Egger statistics (intercept and 2-tailed *P*-value) of the meta-analysis evaluating the effects of a prolonged supplementation with ellagitannins and anthocyanins-containing products on Total Cholesterol (T-C).

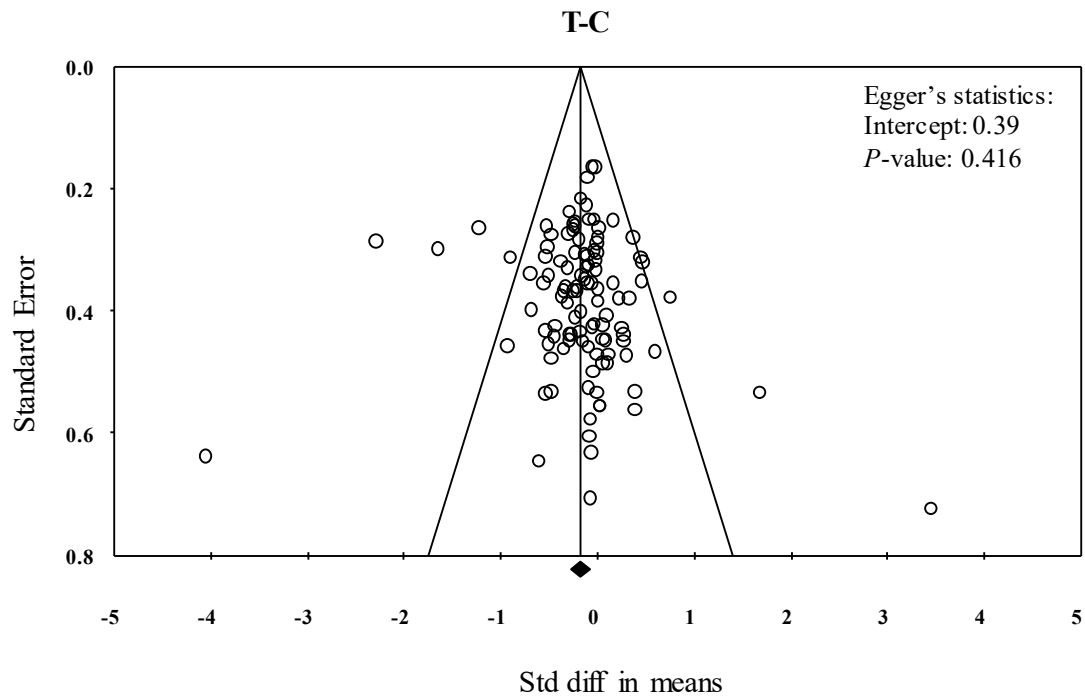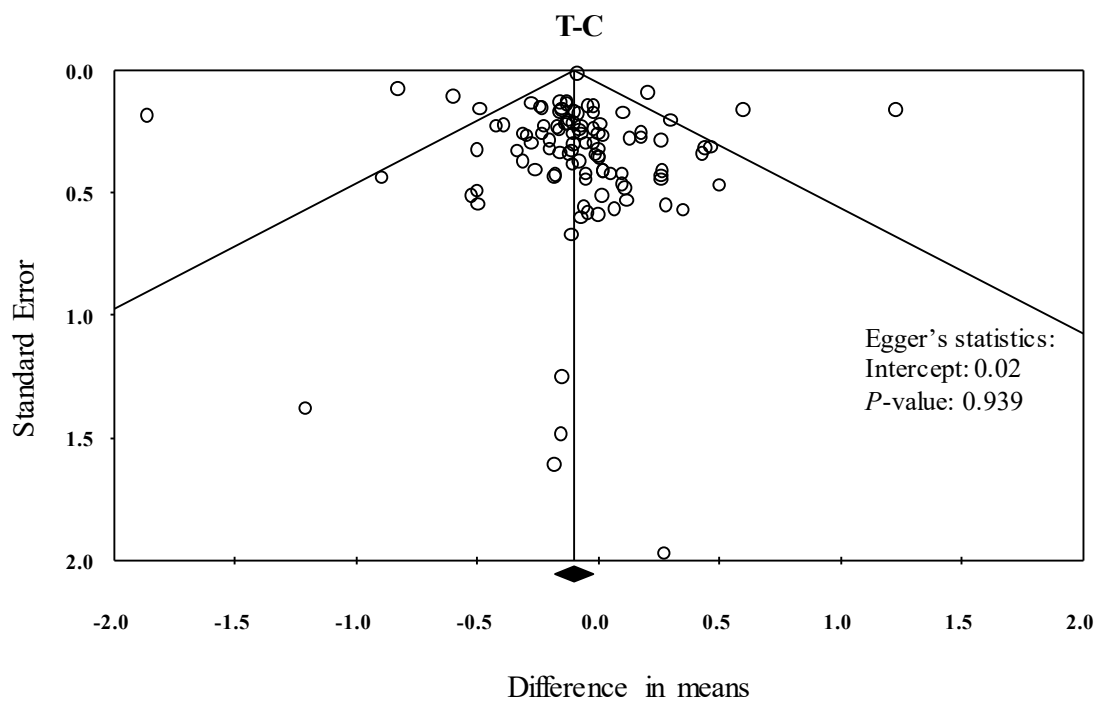

**Supplementary Figure S10.** Forest plot of the meta-analysis evaluating the effects of a prolonged supplementation with ellagitannins and anthocyanins-containing products on LDL-C. A total of 97 studies (displayed in alphabetical order) were analysed. Pooled results are shown at the bottom using a random-effects model. SDM: standardized difference in means, SE: standard error, 95% CI: lower and upper confidence limits for the average SDM, RW: relative weight.

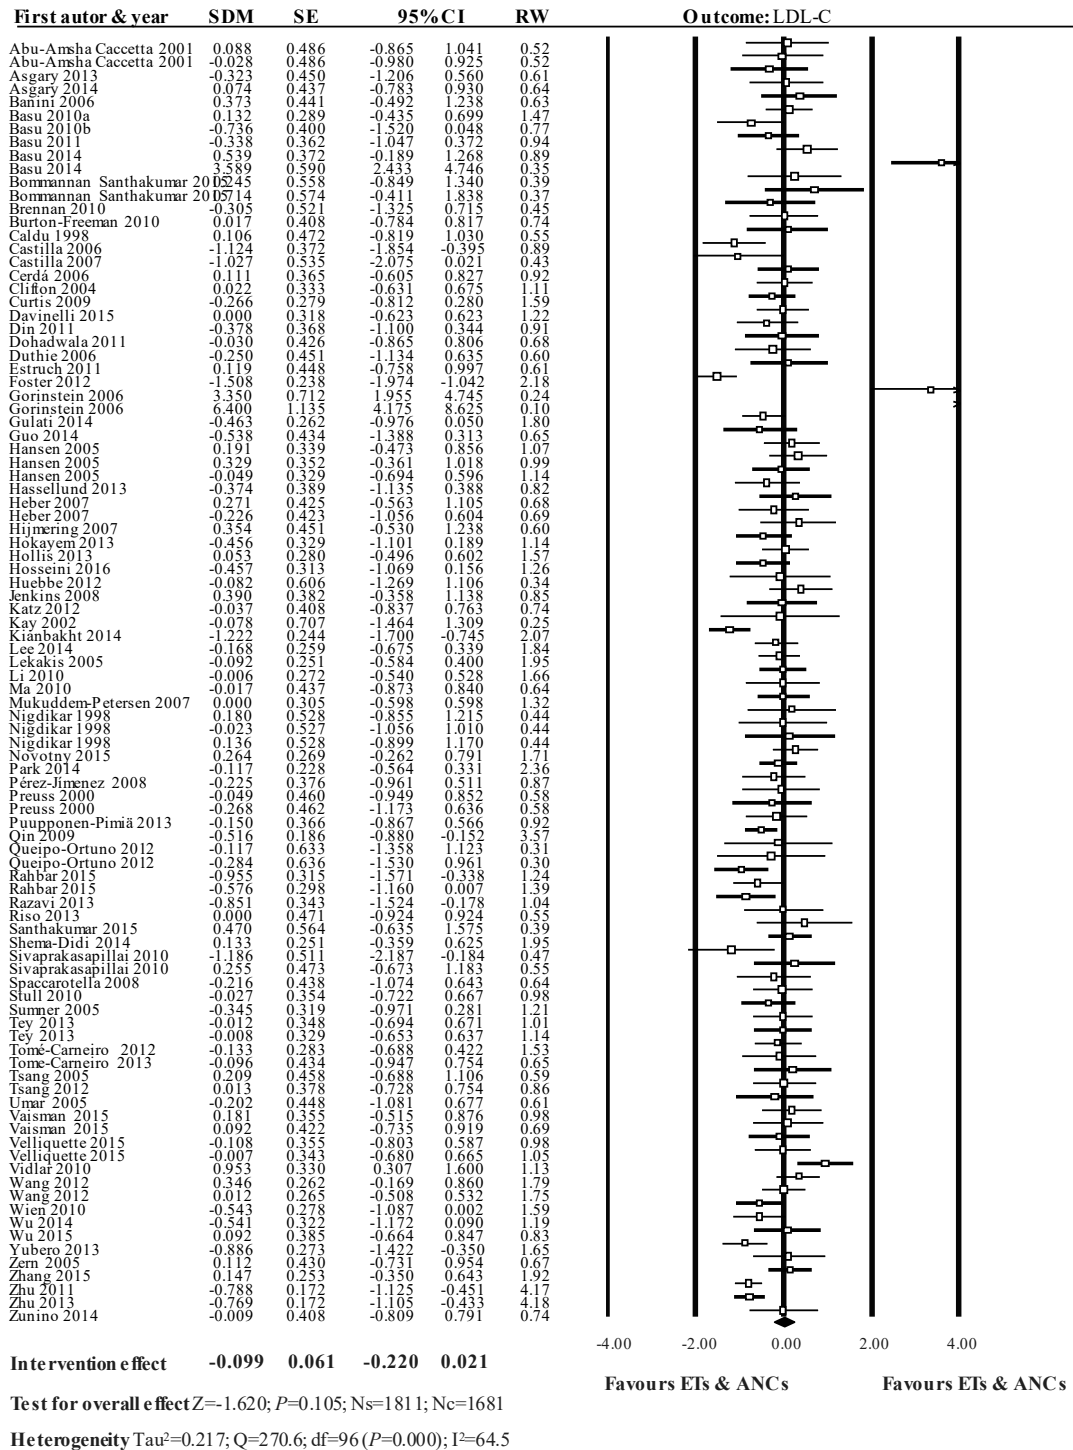

**Supplementary Figure S11.-** Forest plot of the meta-analysis evaluating the effects of a prolonged supplementation with ellagitannins and anthocyanins-containing products on LDL-C. A total of 92 studies (displayed in alphabetical order) were analysed. Pooled results are shown at the bottom using a random-effects model. DM: Difference in means, SE: standard error, 95% CI: lower and upper confidence limits for the average DM, RW: relative weight.

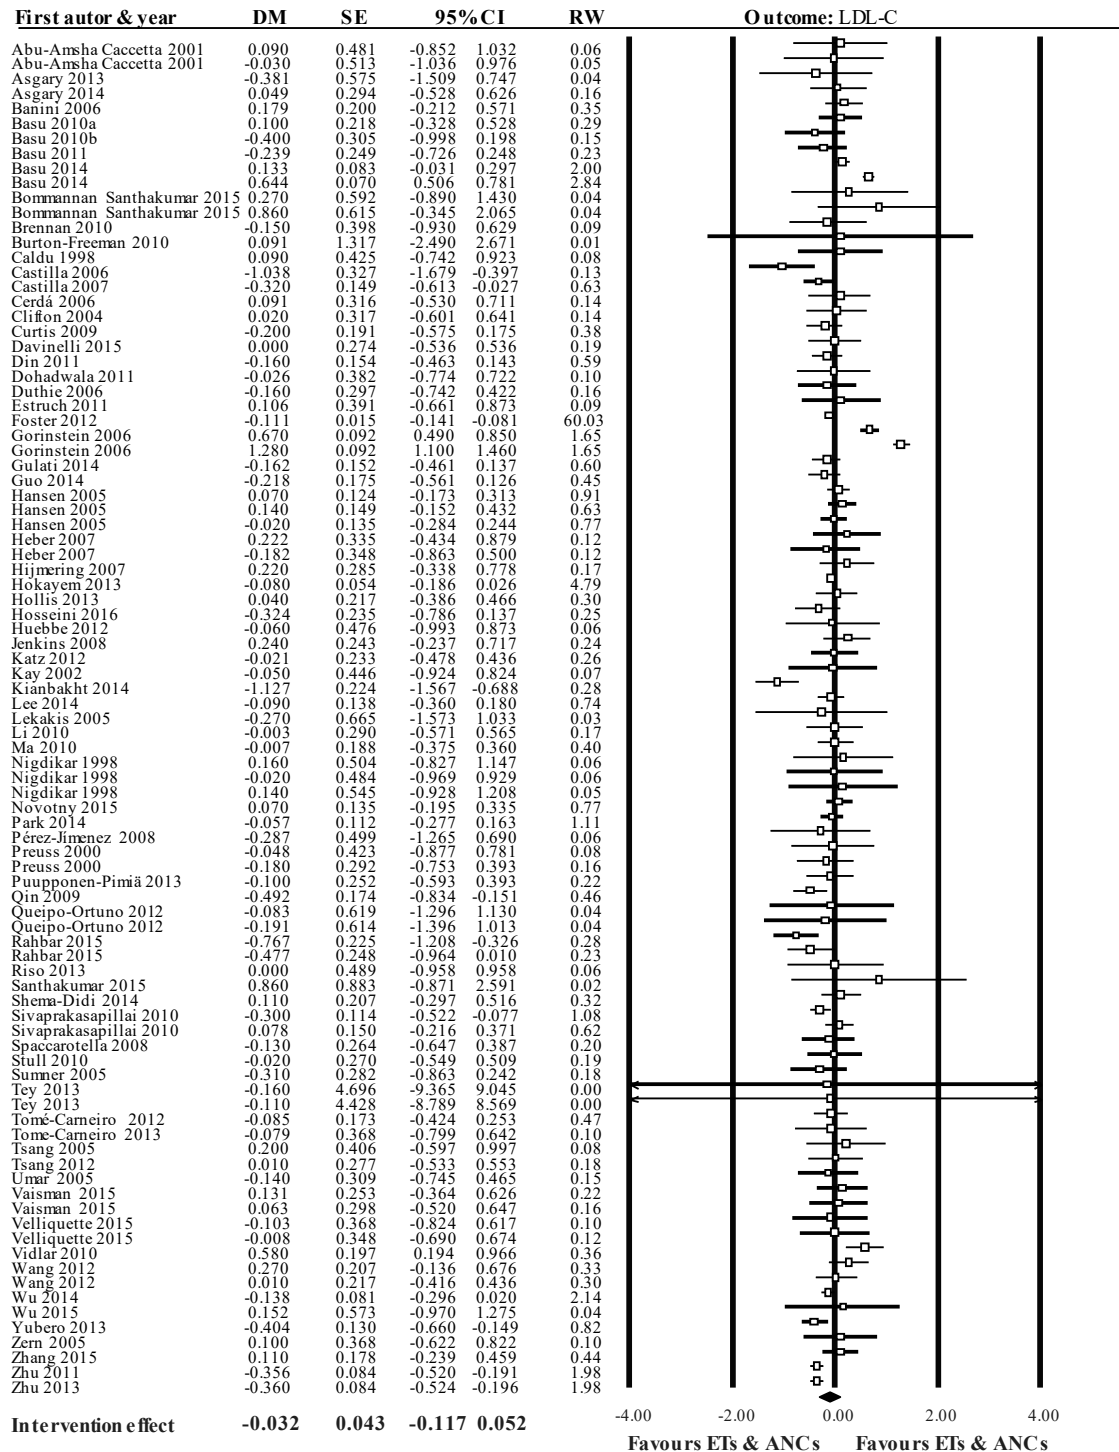

**Supplementary Figure S12.** Funnel plots and Egger statistics (intercept and 2-tailed *P*-value) of the meta-analysis evaluating the effects of a prolonged supplementation with ellagitannins and anthocyanins-containing products on low density lipoprotein- cholesterol (LDL-C).

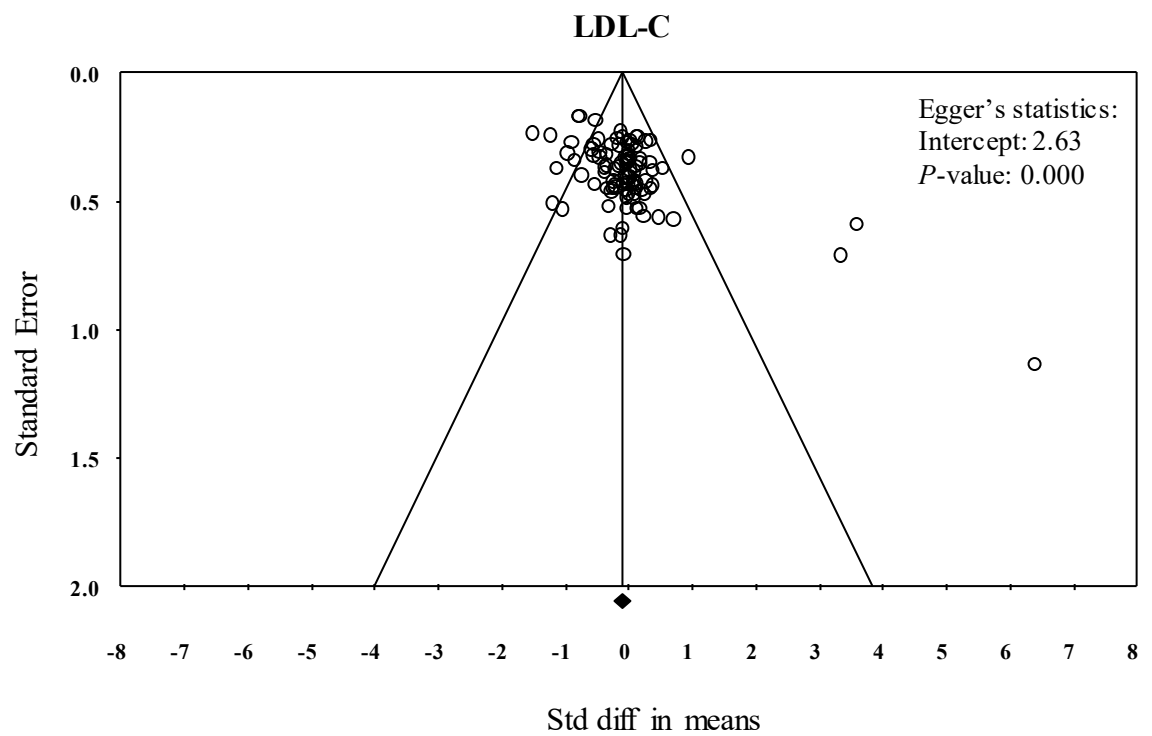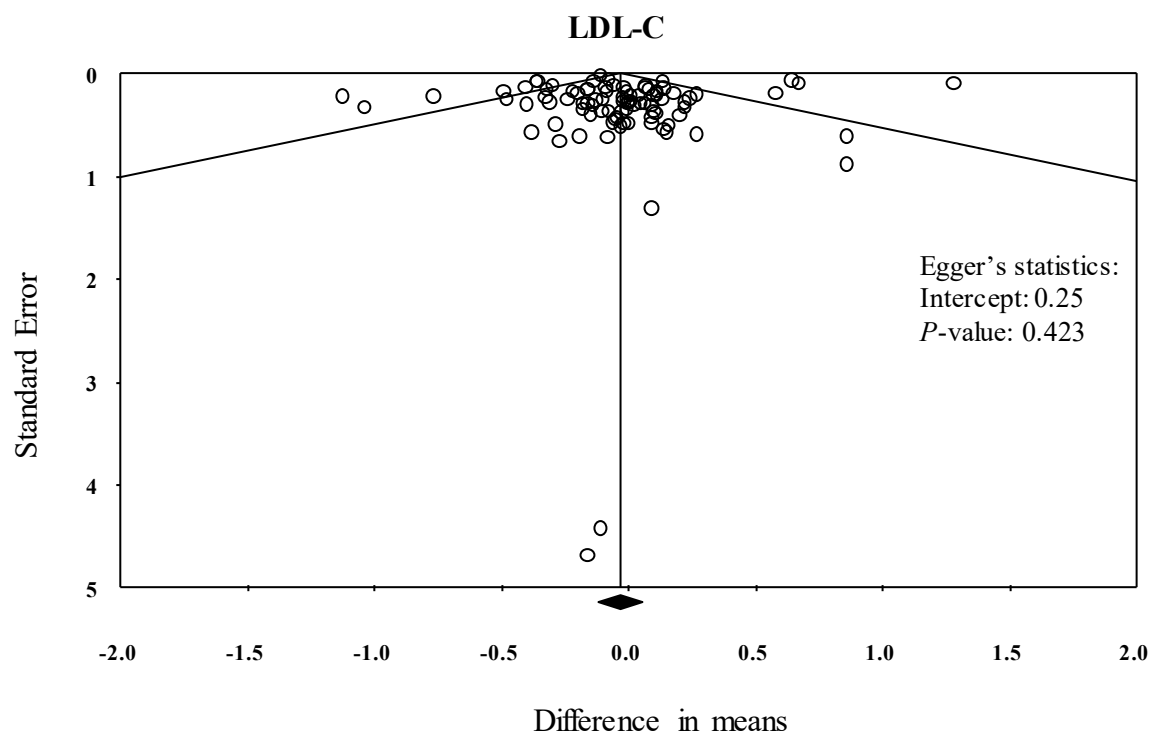

**Supplementary Figure S13.** Forest plot of the meta-analysis evaluating the effects of a prolonged supplementation with ellagitannins and anthocyanins-containing products on HDL-C. A total of 99 studies (displayed in alphabetical order) were analysed. Pooled results are shown at the bottom using a random-effects model. SDM: standardized difference in means, SE: standard error, 95% CI: lower and upper confidence limits for the average SDM, RW: relative weight.

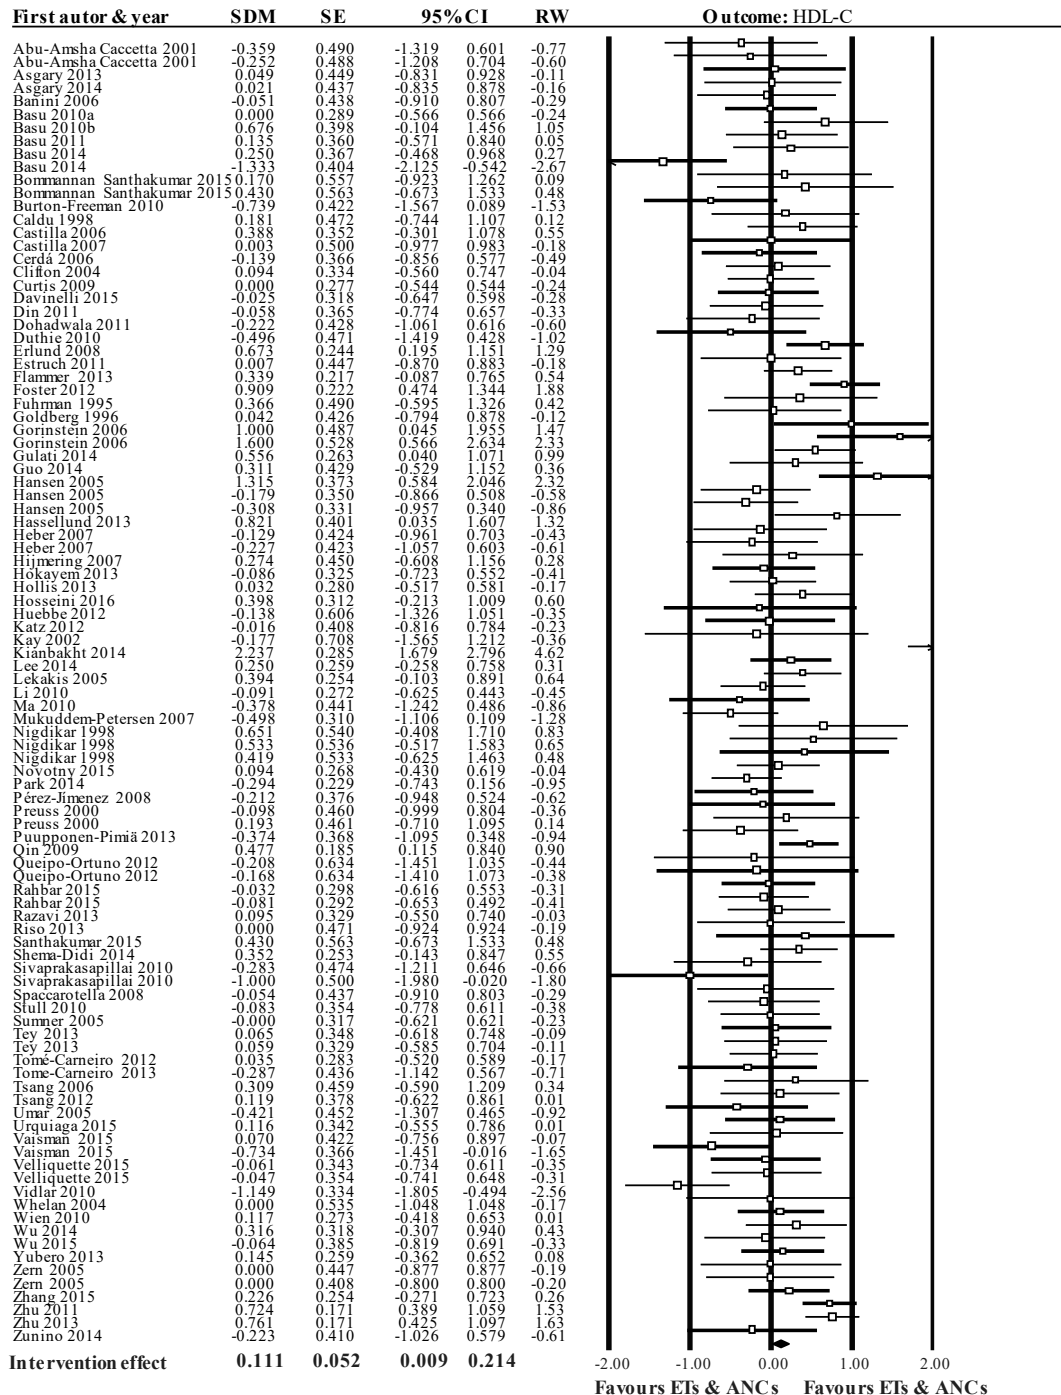

**Supplementary Figure S14.-** Forest plot of the meta-analysis evaluating the effects of a prolonged supplementation with ellagitannins and anthocyanins-containing products on HDL-C. A total of 92 studies (displayed in alphabetical order) were analysed. Pooled results are shown at the bottom using a random-effects model. DM: Difference in means, SE: standard error, 95% CI: lower and upper confidence limits for the average DM, RW: relative weight.

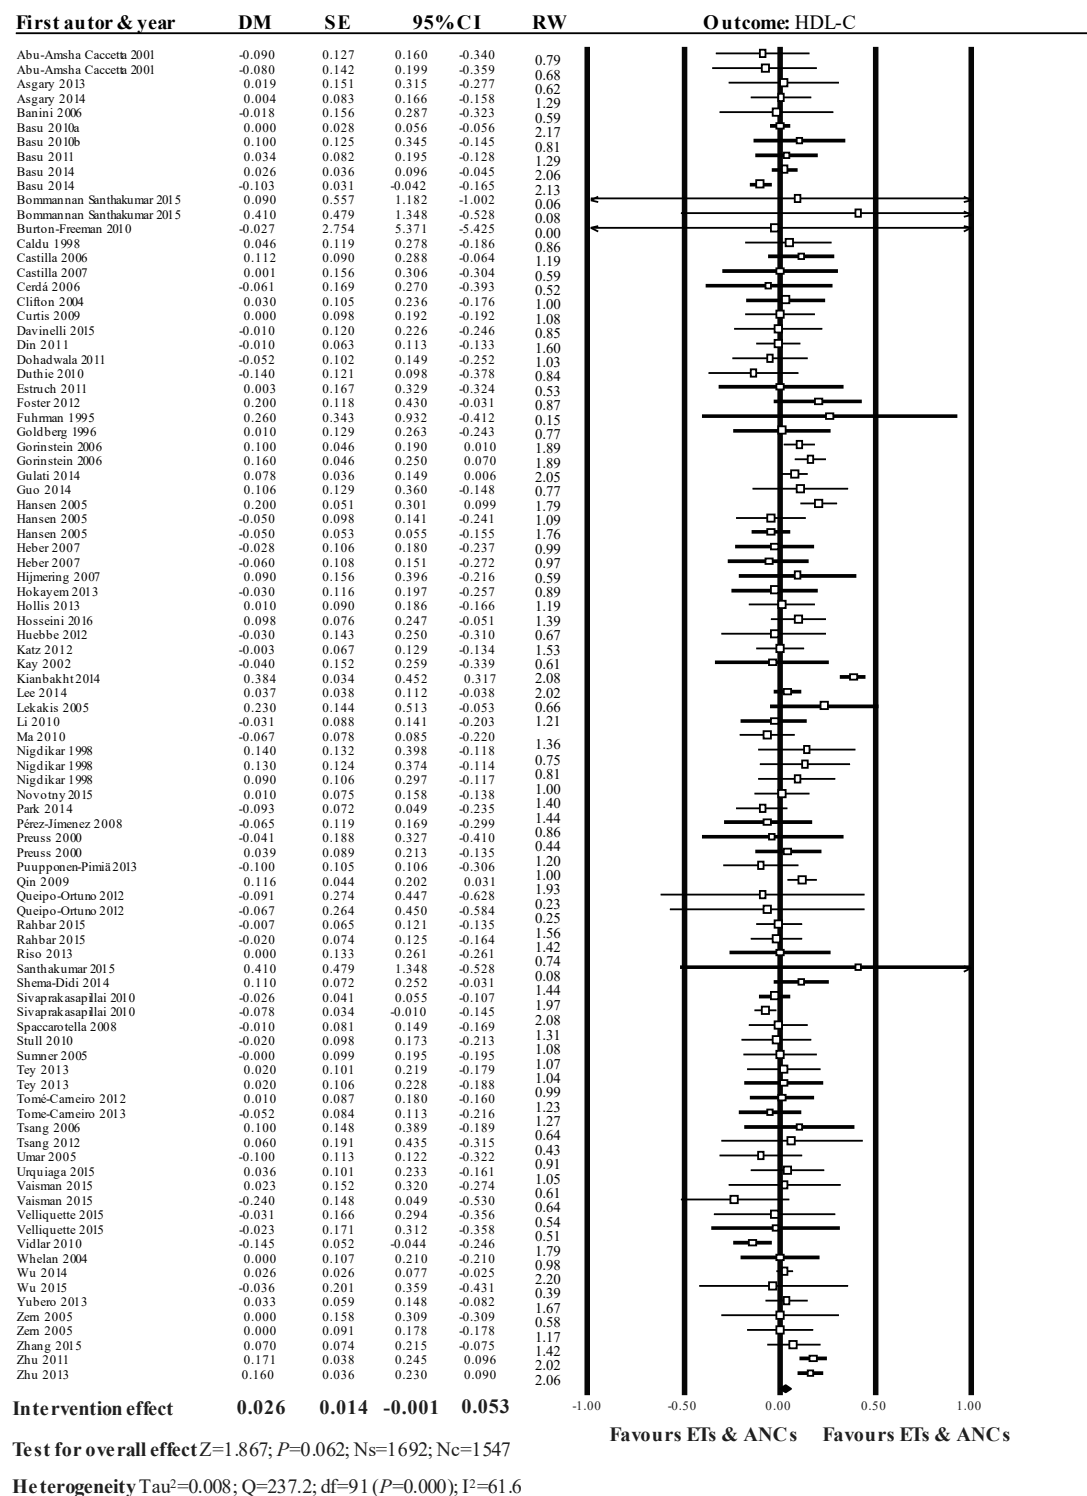

**Supplementary Figure S15.** Funnel plots and Egger statistics (intercept and 2-tailed *P*-value) of the meta-analysis evaluating the effects of a prolonged supplementation with ellagitannins and anthocyanins-containing products on high density lipoprotein- cholesterol (HDL-C).

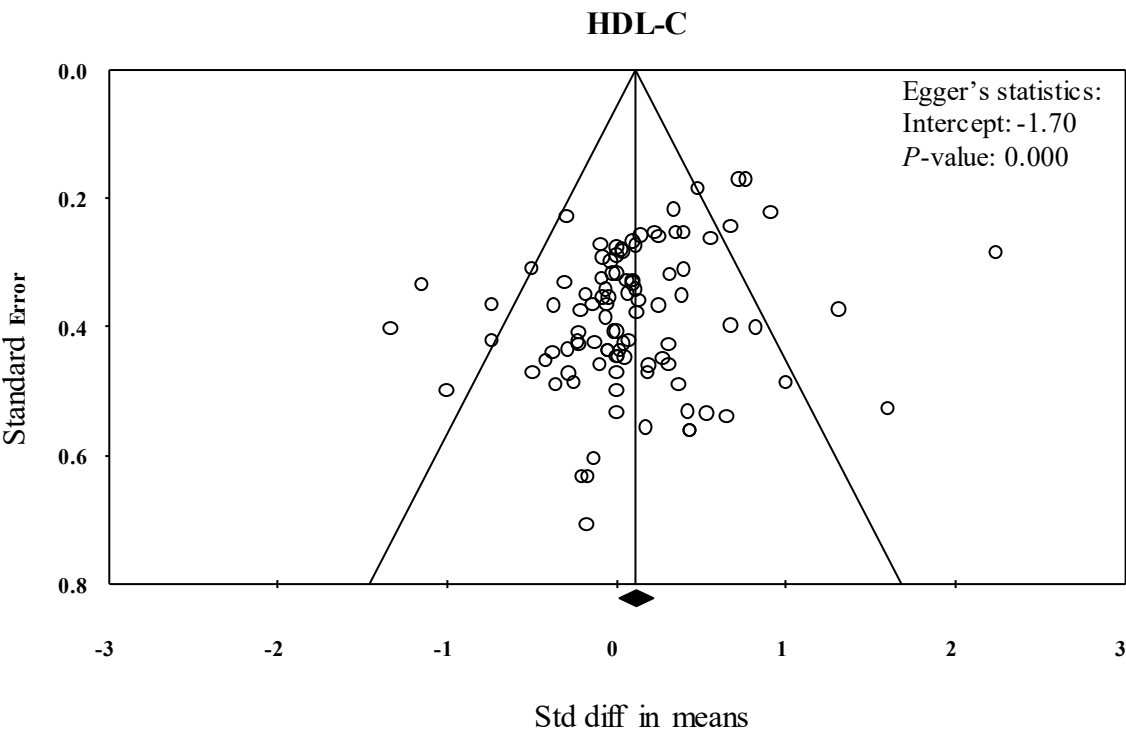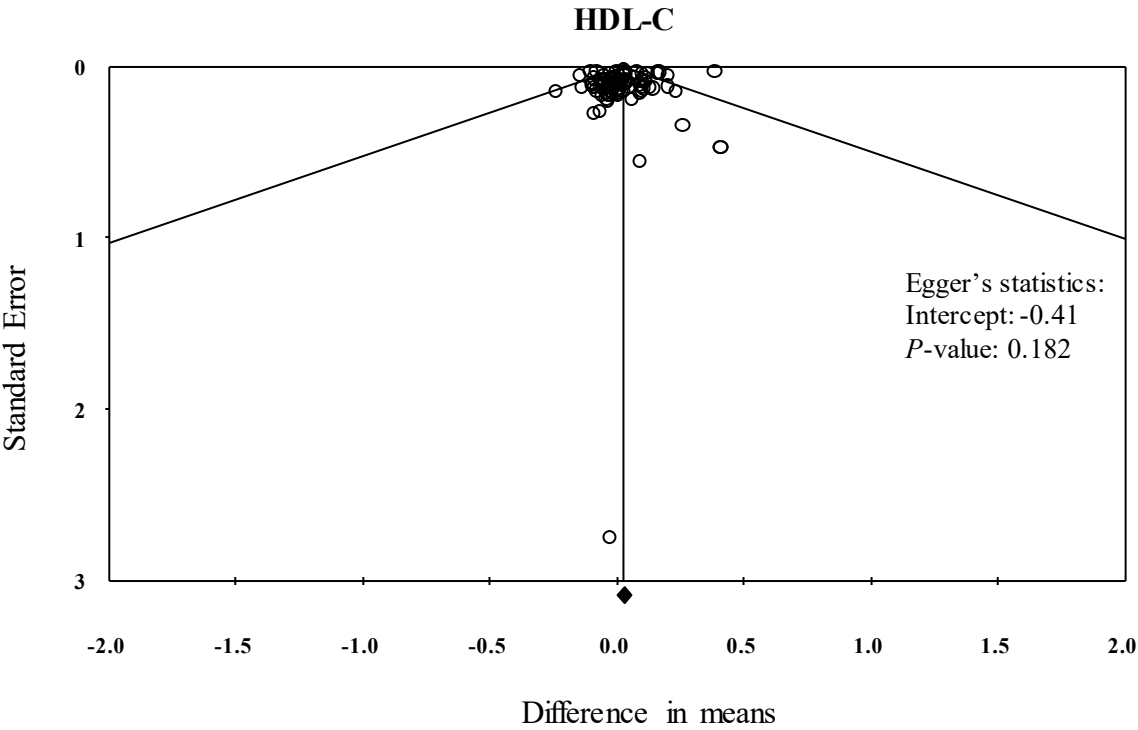

**Supplementary Figure S16.** Forest plot of the meta-analysis evaluating the effects of a prolonged supplementation with ellagitannins and anthocyanins-containing products on TAGs. A total of 97 studies (displayed in alphabetical order) were analysed. Pooled results are shown at the bottom using a random-effects model. SDM: standardized difference in means, SE: standard error, 95% CI: lower and upper confidence limits for the average SDM, RW: relative weight.

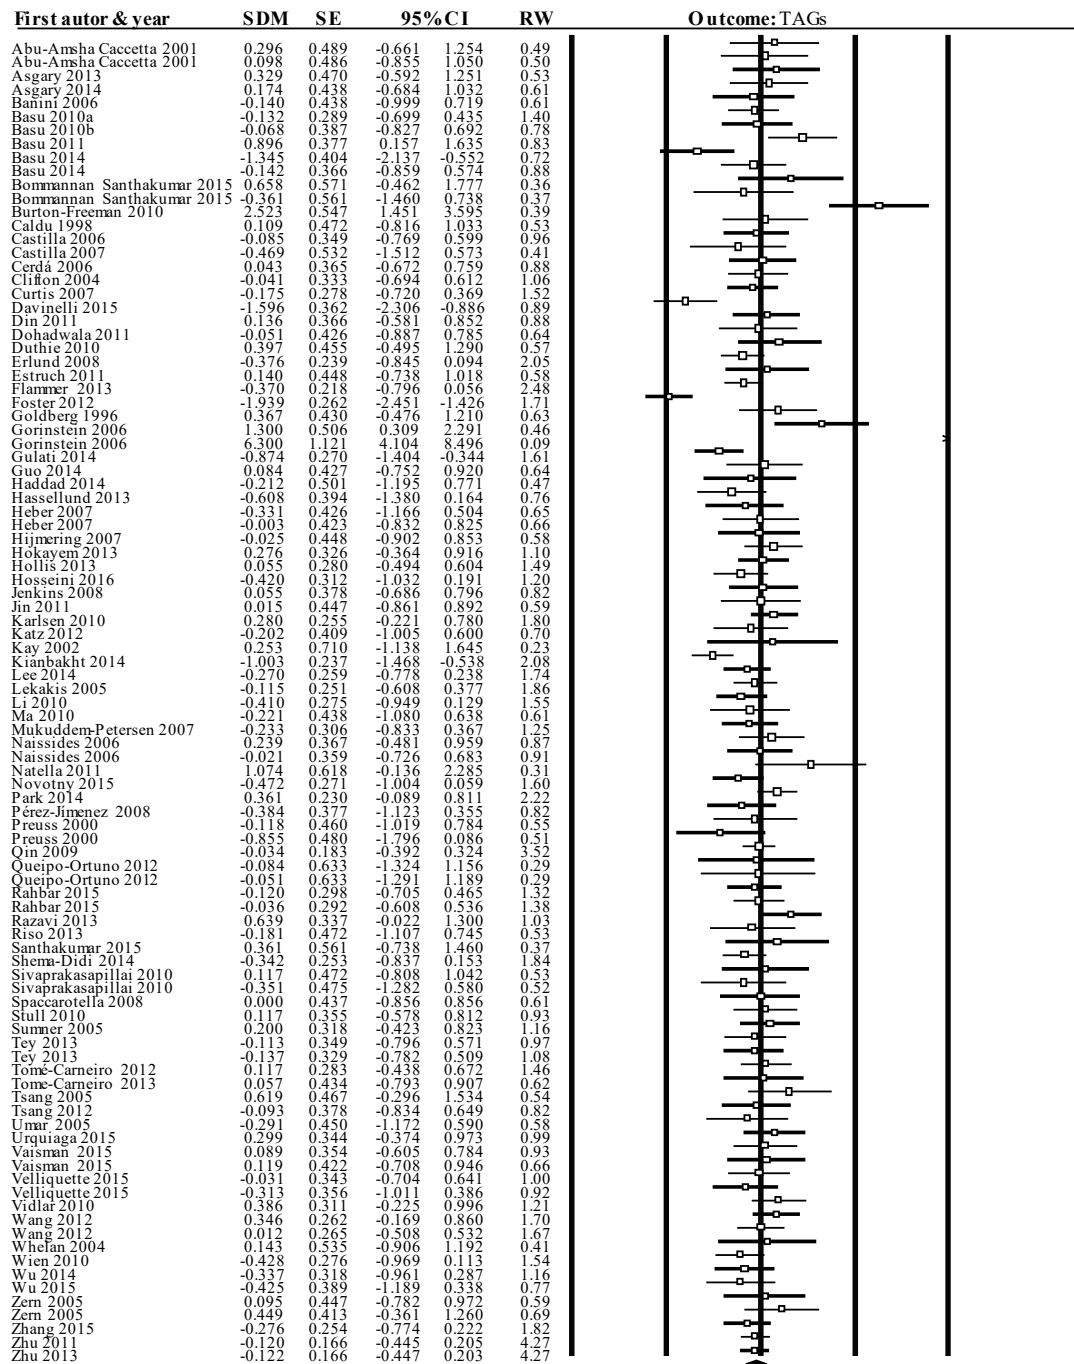

**Intervention effect** -0.065 0.055 -0.174 0.043

-4.00 -2.00 0.00 2.00 4.00  
Favours ETs & ANCs Favours ETs & ANCs

**Test for overall effect**  $Z=-1.182$ ;  $P=0.237$ ;  $Ns=1859$ ;  $Nc=1743$

**Heterogeneity**  $\tau^2=0.157$ ;  $Q=227.7$ ;  $df=96$  ( $P=0.000$ );  $I^2=57.8$



**Supplementary Figure S17.-** Forest plot of the meta-analysis evaluating the effects of a prolonged supplementation with ellagitannins and anthocyanins-containing products on TAGs. A total of 88 studies (displayed in alphabetical order) were analysed. Pooled results are shown at the bottom using a random-effects model. DM: Difference in means, SE: standard error, 95% CI: lower and upper confidence limits for the average DM, RW: relative weight.

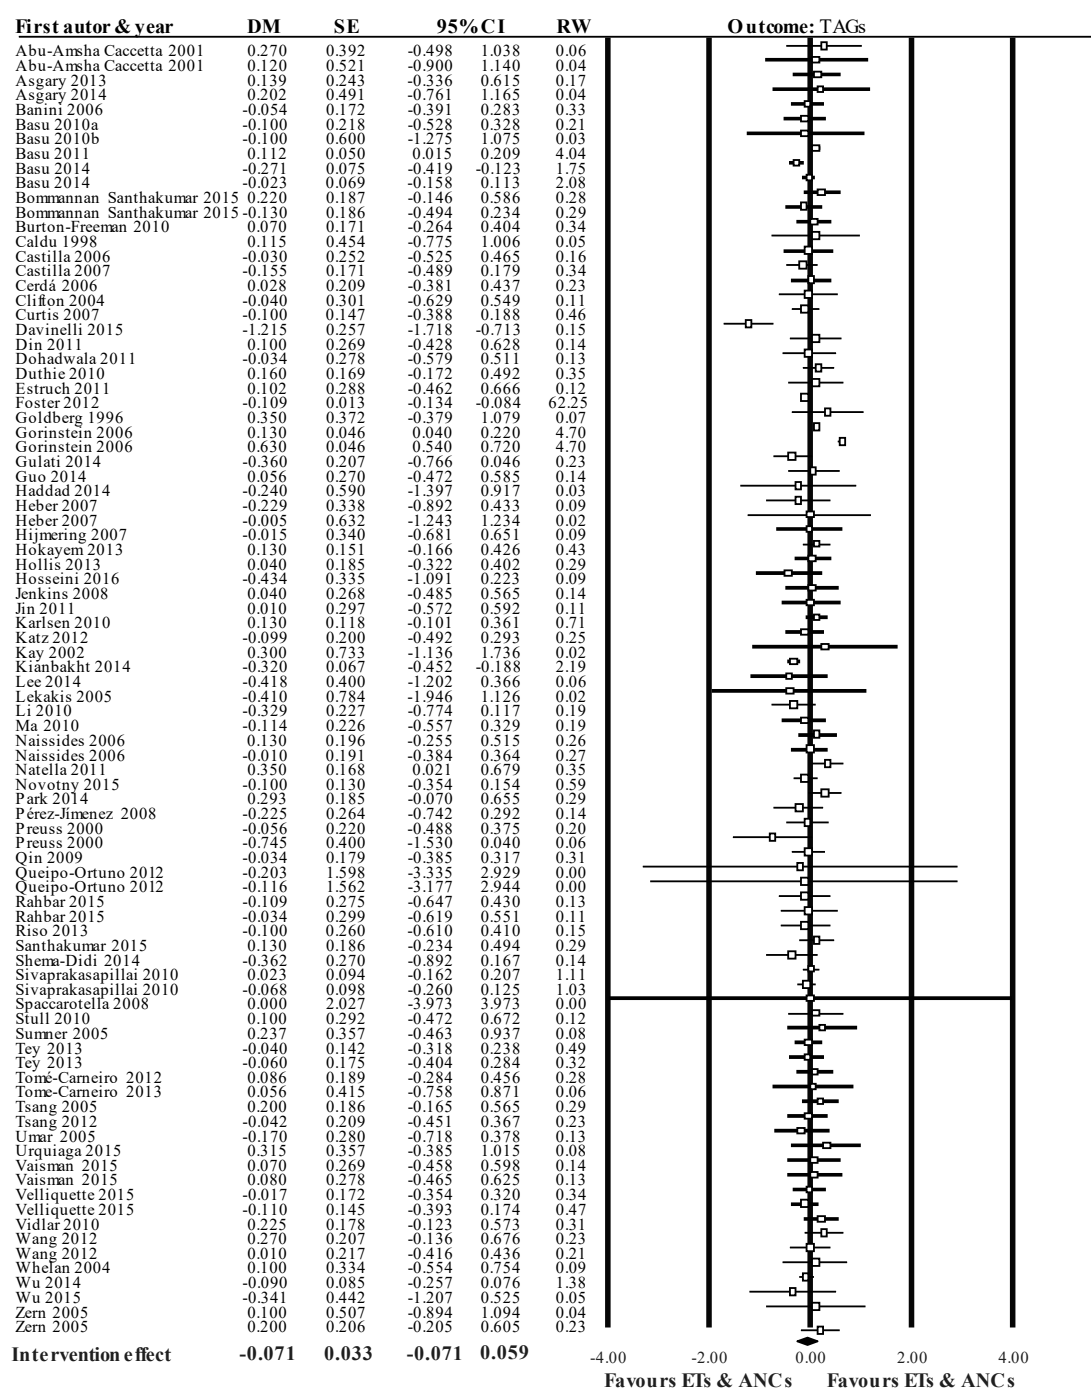

Test for overall effect  $Z=-0.177$ ;  $P=0.086$ ;  $Ns=1525$ ;  $Nc=1404$

Heterogeneity  $\text{Tau}^2=0.045$ ;  $Q=360.4$ ;  $df=87$  ( $P=0.000$ );  $I^2=75.9$

**Supplementary Figure S18.** Funnel plots and Egger statistics (intercept and 2-tailed *P*-value) of the meta-analysis evaluating the effects of a prolonged supplementation with ellagitannins and anthocyanins-containing products on triacylglycerols (TAGs).

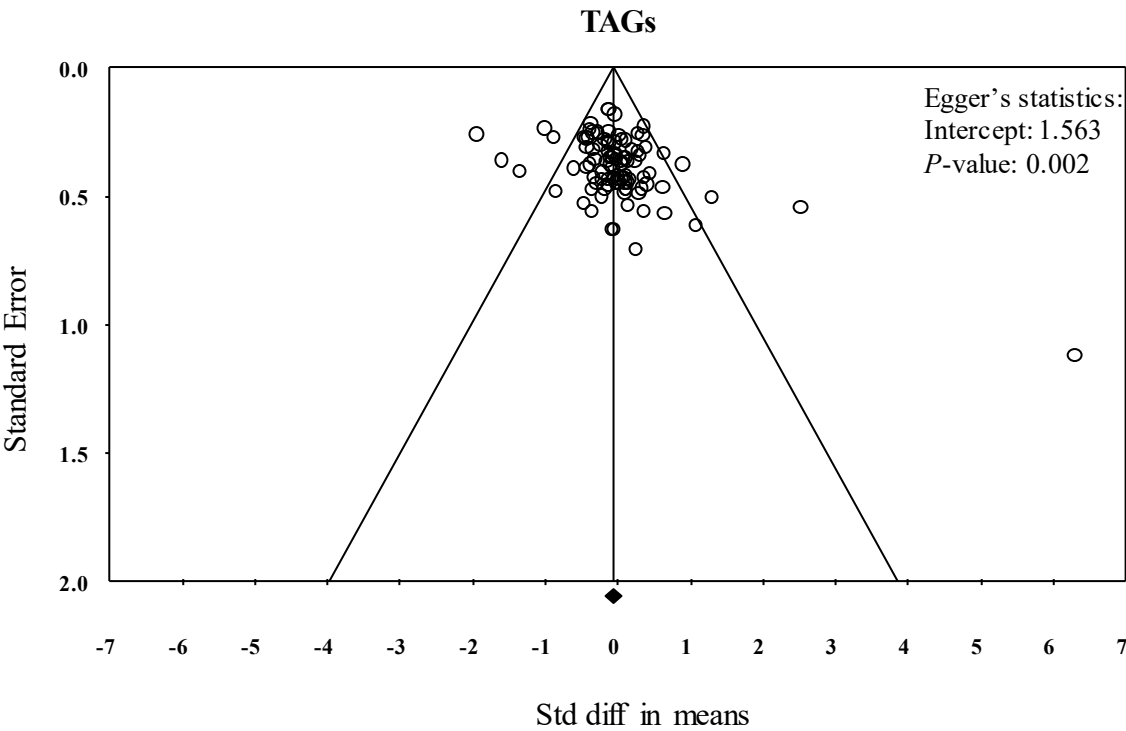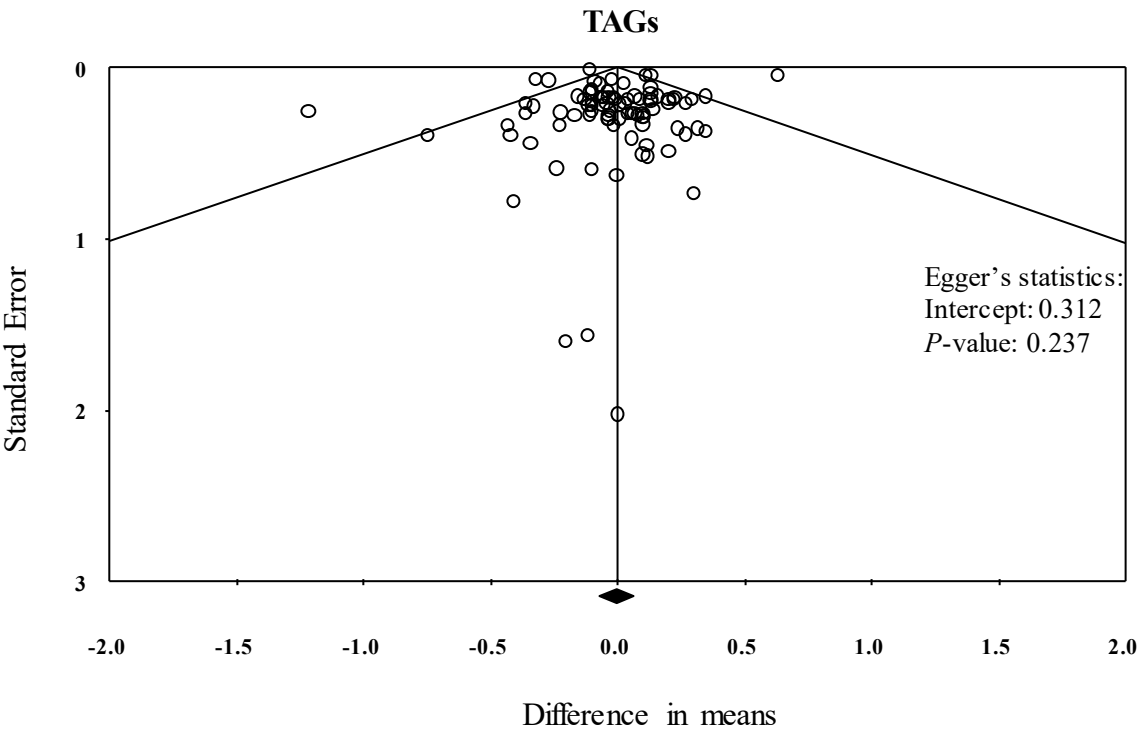

**Supplementary Figure S19.** Forest plot of the meta-analysis evaluating the effects of a prolonged supplementation with ellagitannins and anthocyanins-containing products on SBP. A total of 95 studies (displayed in alphabetical order) were analysed. Pooled results are shown at the bottom using a random-effects model. SDM: standardized difference in means, SE: standard error, 95% CI: lower and upper confidence limits for the average SDM, RW: relative weight.

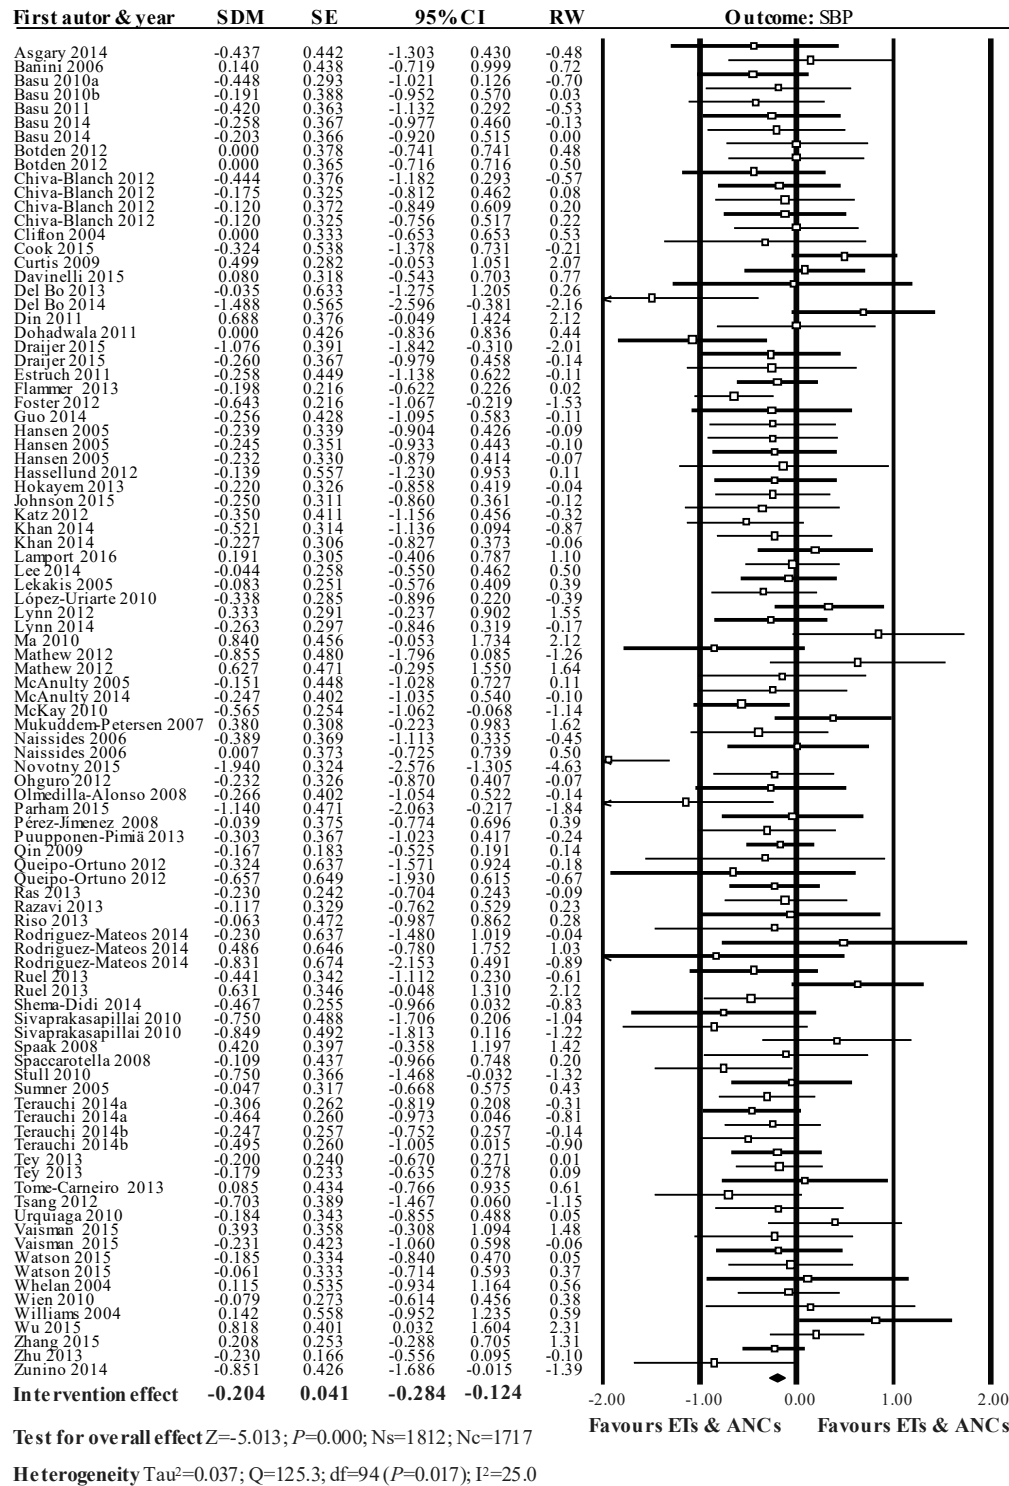

**Supplementary Figure S20.-** Forest plot of the meta-analysis evaluating the effects of a prolonged supplementation with ellagitannins and anthocyanins-containing products on SBP. A total of 83 studies (displayed in alphabetical order) were analysed. Pooled results are shown at the bottom using a random-effects model. DM: Difference in means, SE: standard error, 95% CI: lower and upper confidence limits for the average DM, RW: relative weight.

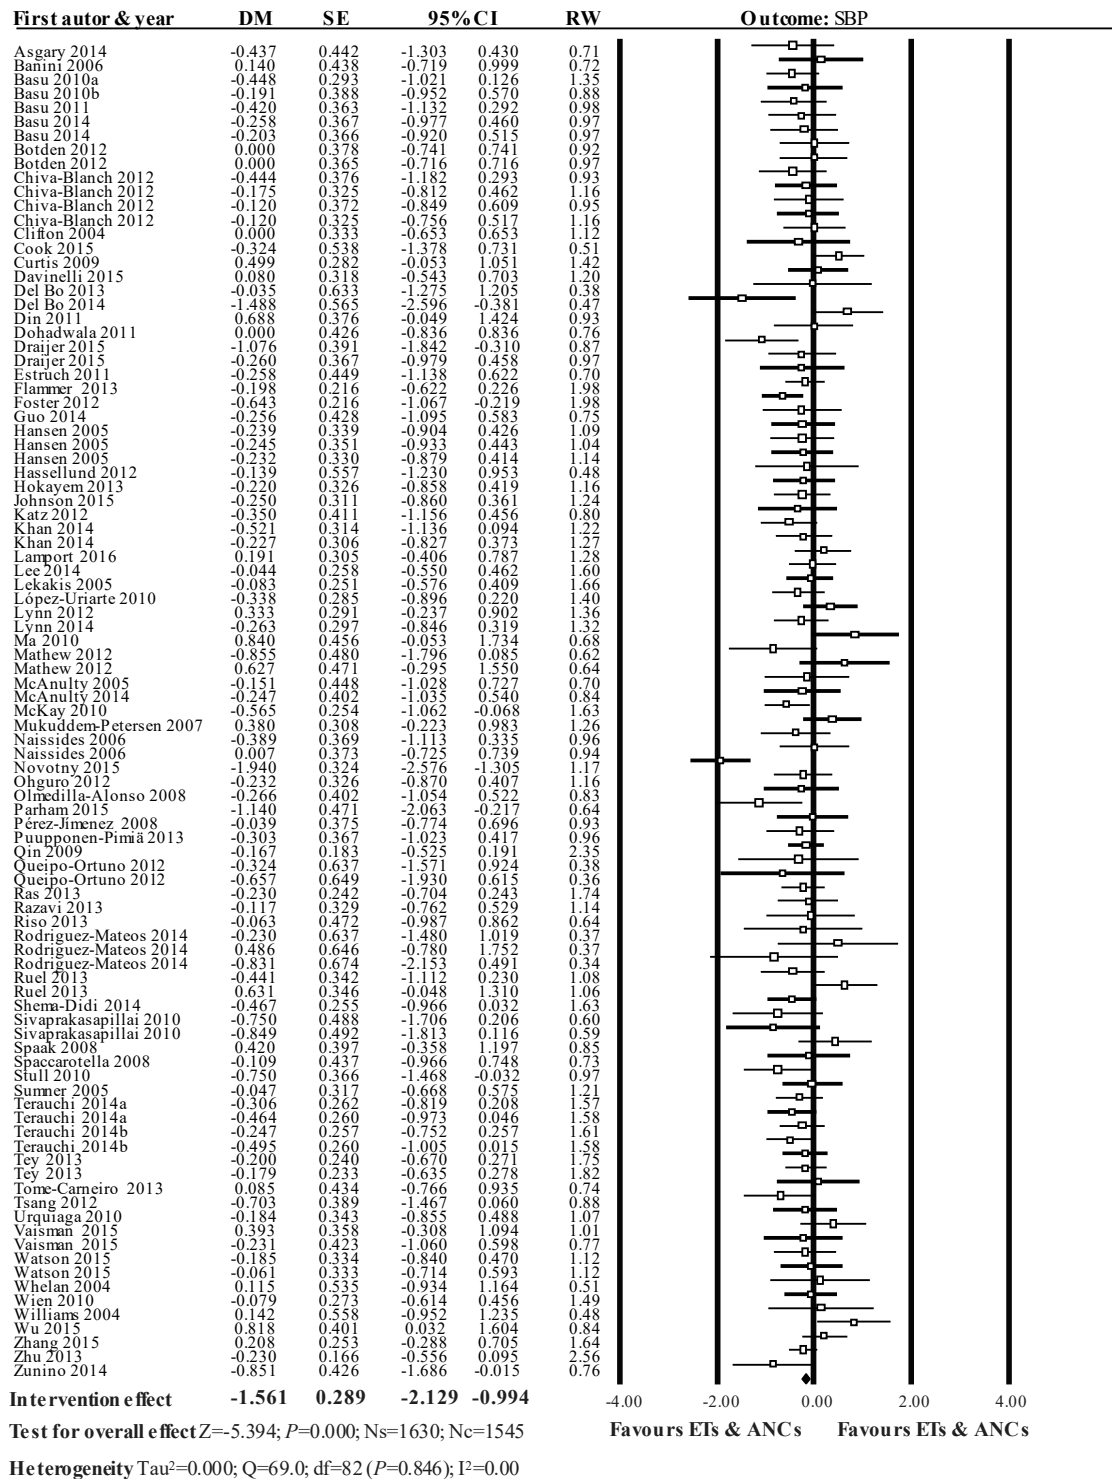

**Supplementary Figure S21.** Funnel plots and Egger statistics (intercept and 2-tailed *P*-value) of the meta-analysis evaluating the effects of a prolonged supplementation with ellagitannins and anthocyanins-containing products on systolic blood pressure (SBP).

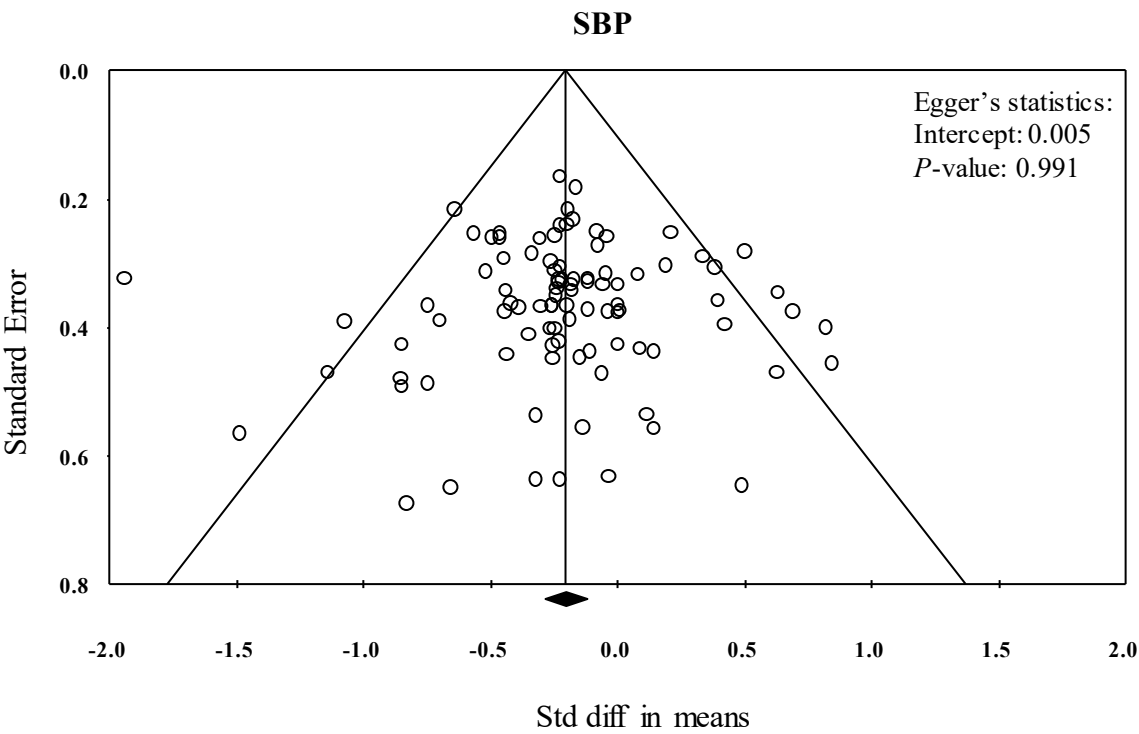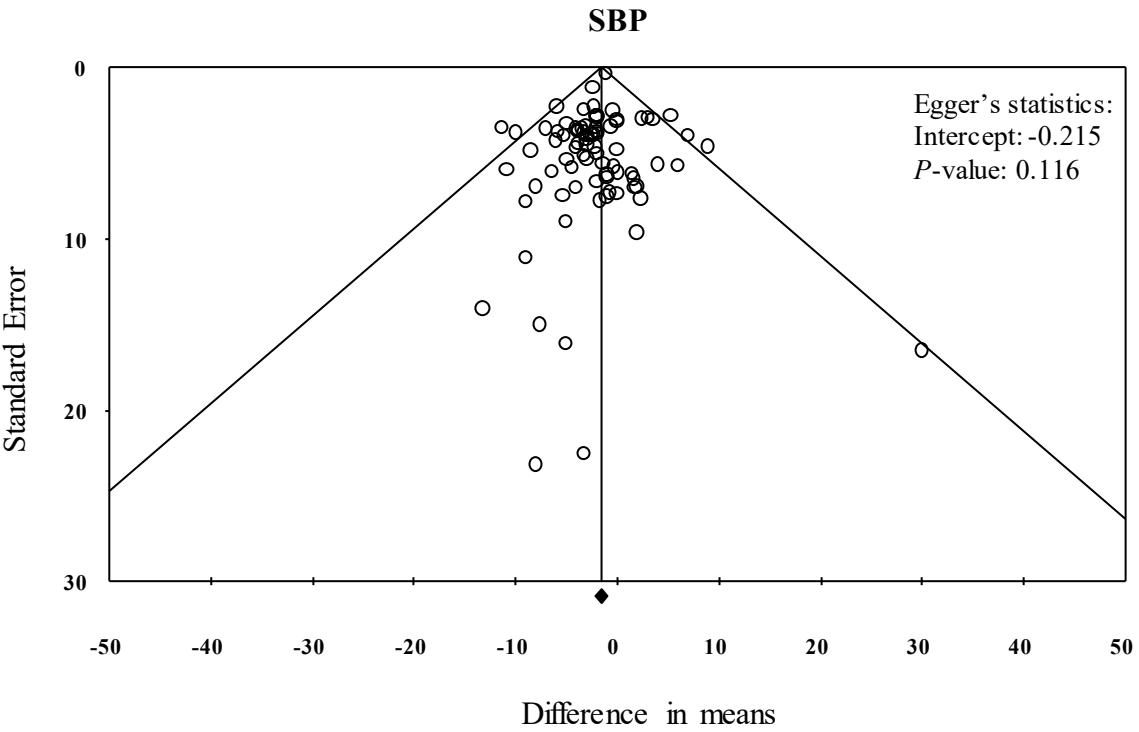

**Supplementary Figure S22.** Forest plot of the meta-analysis evaluating the effects of a prolonged supplementation with ellagitannins and anthocyanins-containing products on DBP. A total of 99 studies (displayed in alphabetical order) were analysed. Pooled results are shown at the bottom using a random-effects model. SDM: standardized difference in means, SE: standard error, 95% CI: lower and upper confidence limits for the average SDM, RW: relative weight.

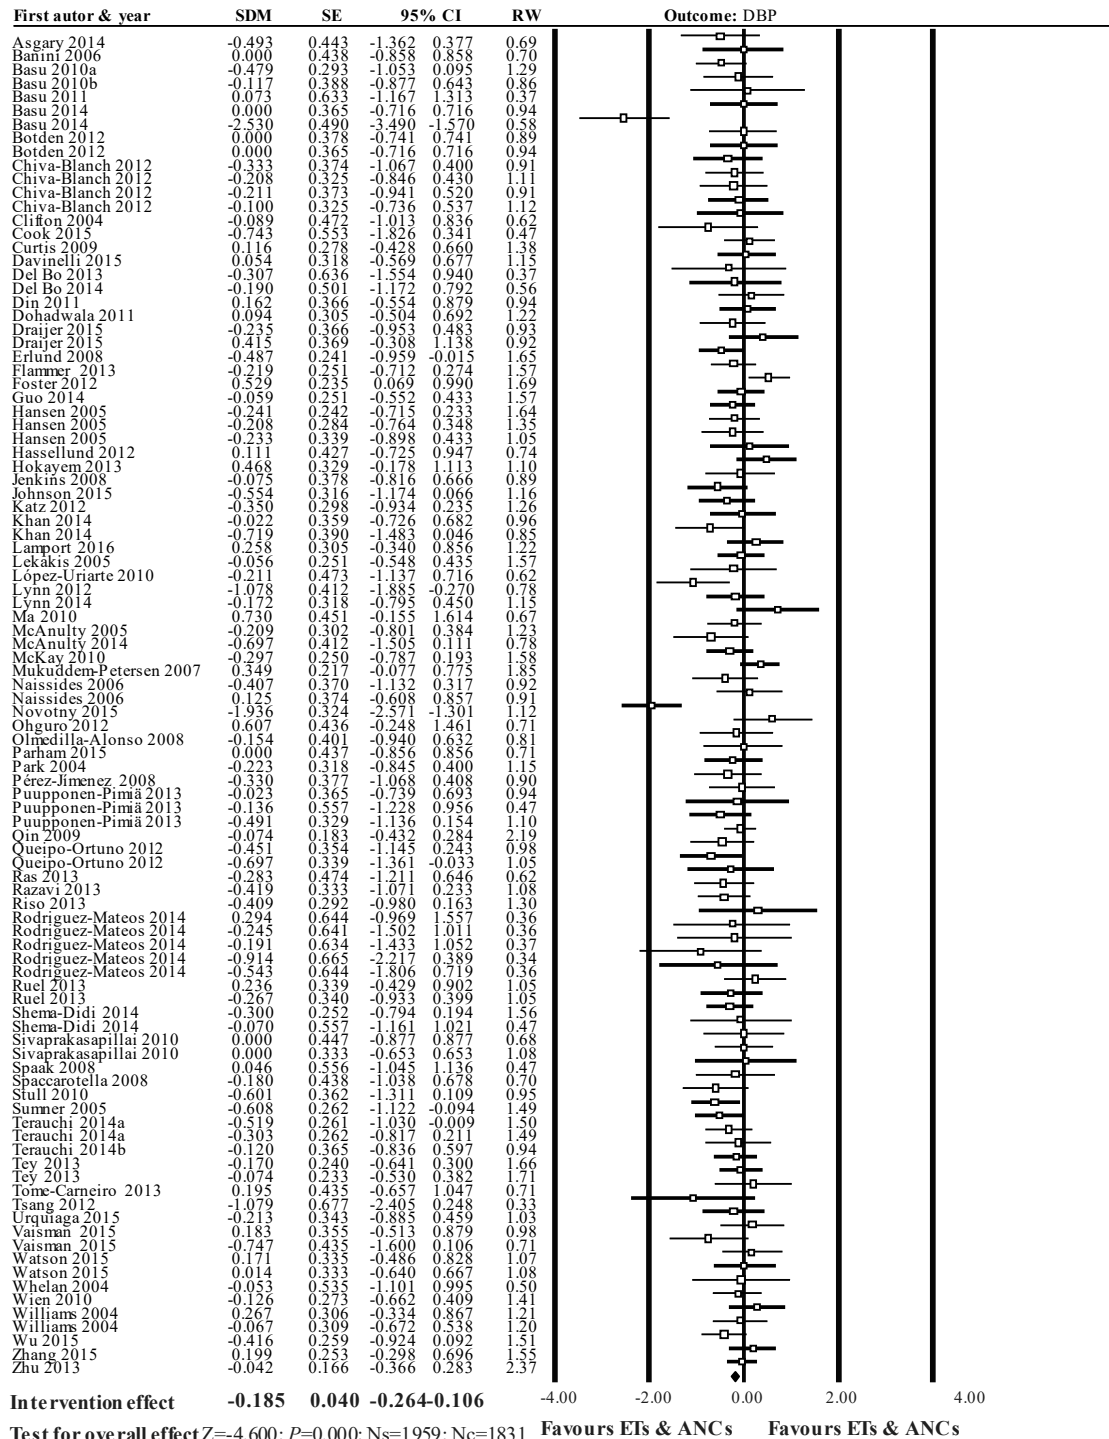

**Supplementary Figure S23.-** Forest plot of the meta-analysis evaluating the effects of a prolonged supplementation with ellagitannins and anthocyanins-containing products on DBP. A total of 90 studies (displayed in alphabetical order) were analysed. Pooled results are shown at the bottom using a random-effects model. DM: Difference in means, SE: standard error, 95% CI: lower and upper confidence limits for the average DM, RW: relative weight.

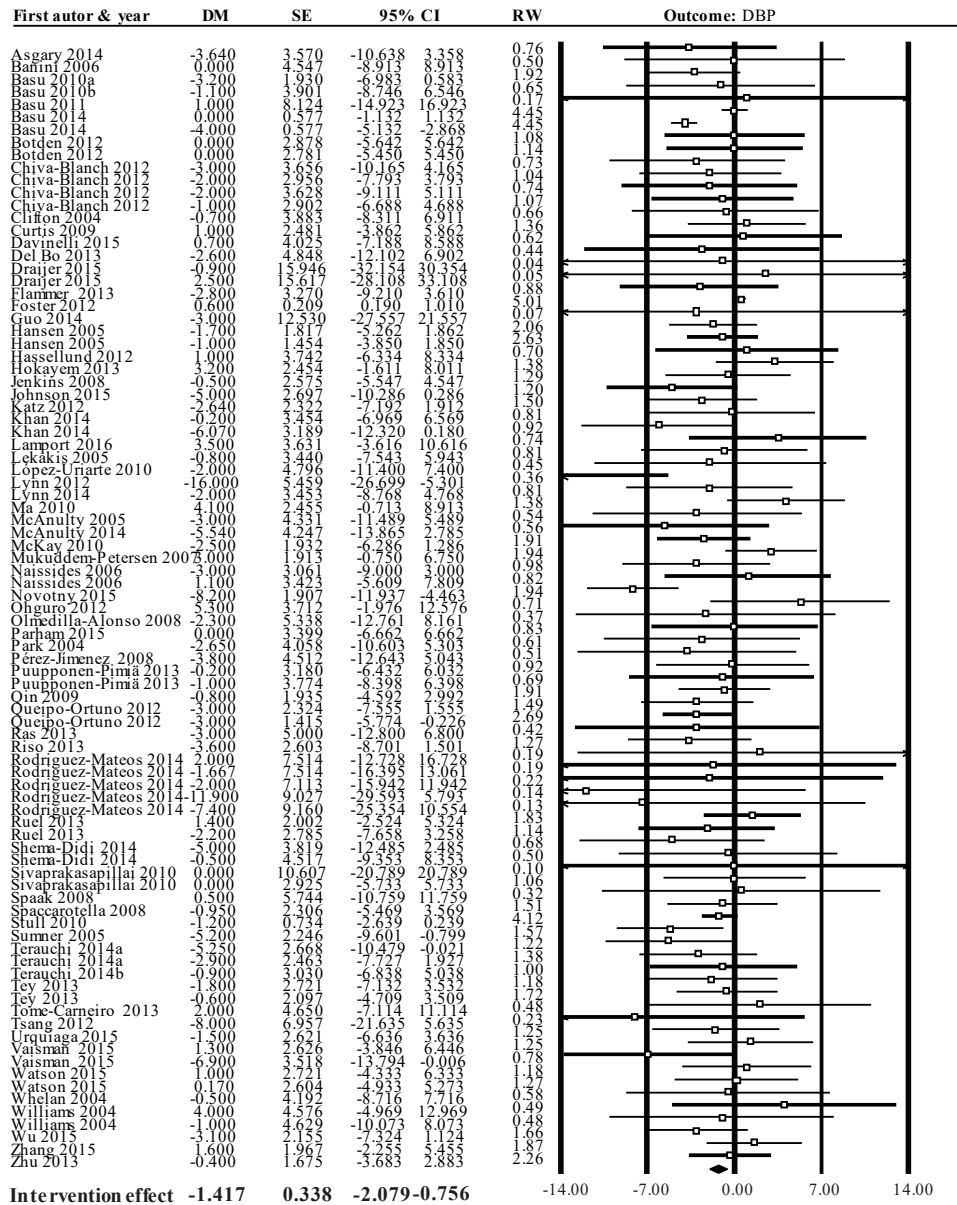

Test for overall effect  $Z=-4.198$ ;  $P=0.000$ ;  $Ns=1782$ ;  $Nc=1655$

Heterogeneity  $\tau^2=2.301$ ;  $Q=152.4$ ;  $df=89$  ( $P=0.000$ );  $I^2=41.6$

**Supplementary Figure S24.** Funnel plots and Egger statistics (intercept and 2-tailed *P*-value) of the meta-analysis evaluating the effects of a prolonged supplementation with ellagitannins and anthocyanins-containing products on diastolic blood pressure (DBP).

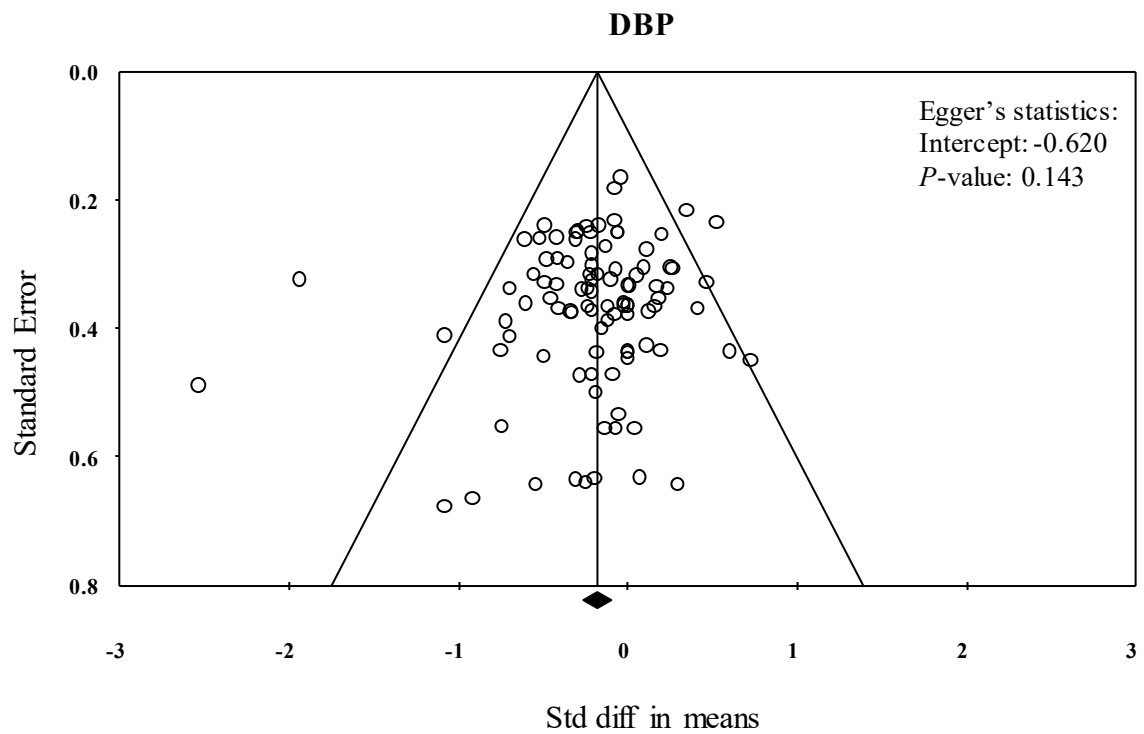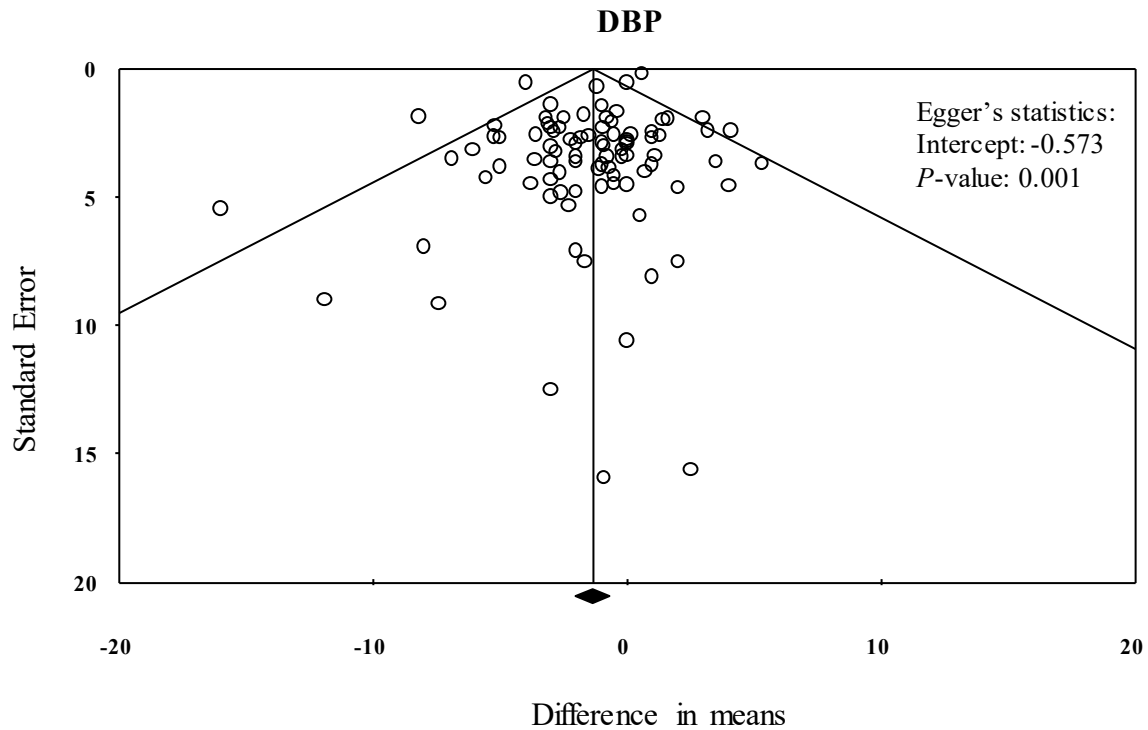



**Supplementary Figure S25.** Forest plot of the meta-analysis evaluating the effects of a prolonged supplementation with ellagitannins and anthocyanins-containing products on FMD. A total of 22 studies (displayed in alphabetical order) were analysed. Pooled results are shown at the bottom using a random-effects model. SDM: standardized difference in means, SE: standard error, 95% CI: lower and upper confidence limits for the average SDM, RW: relative weight.

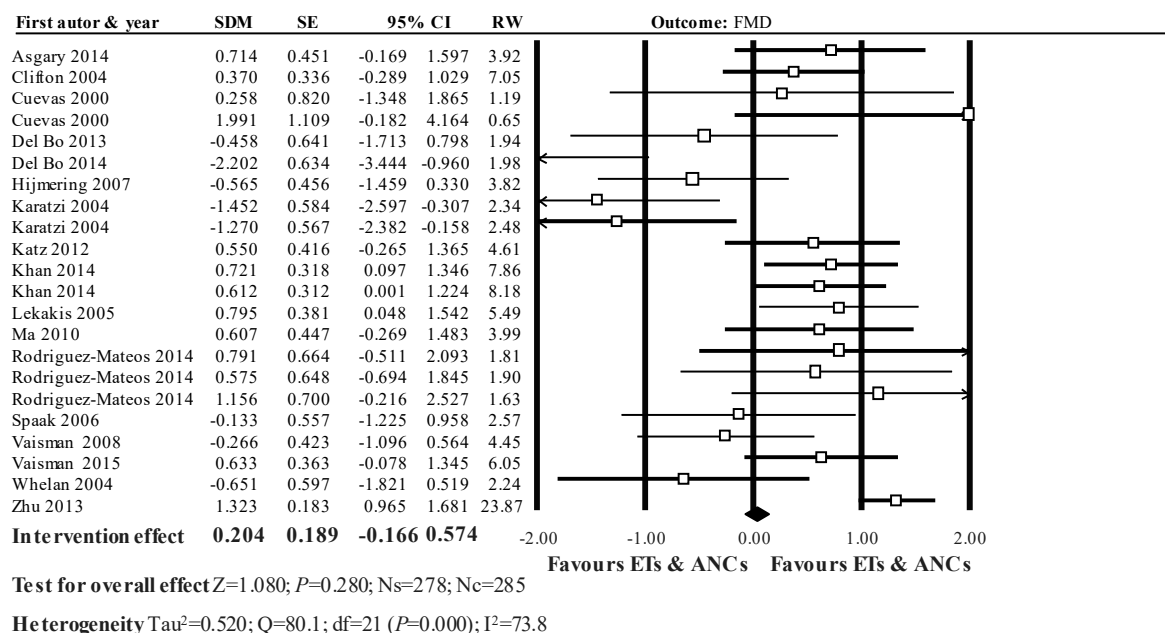

**Supplementary Figure S26.-** Forest plot of the meta-analysis evaluating the effects of a prolonged supplementation with ellagitannins and anthocyanins-containing products on FMD. A total of 21 studies (displayed in alphabetical order) were analysed. Pooled results are shown at the bottom using a random-effects model. DM: Difference in means, SE: standard error, 95% CI: lower and upper confidence limits for the average DM, RW: relative weight.

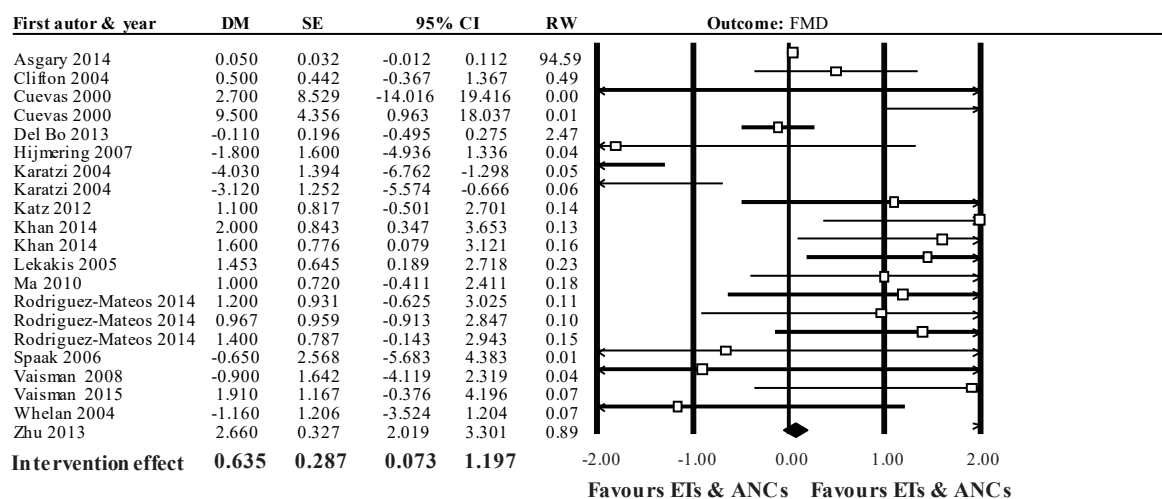

**Supplementary Figure S27.** Funnel plots and Egger statistics (intercept and 2-tailed *P*-value) of the meta-analysis evaluating the effects of a prolonged supplementation with ellagitannins and anthocyanins-containing products on flow mediated dilation (FMD).

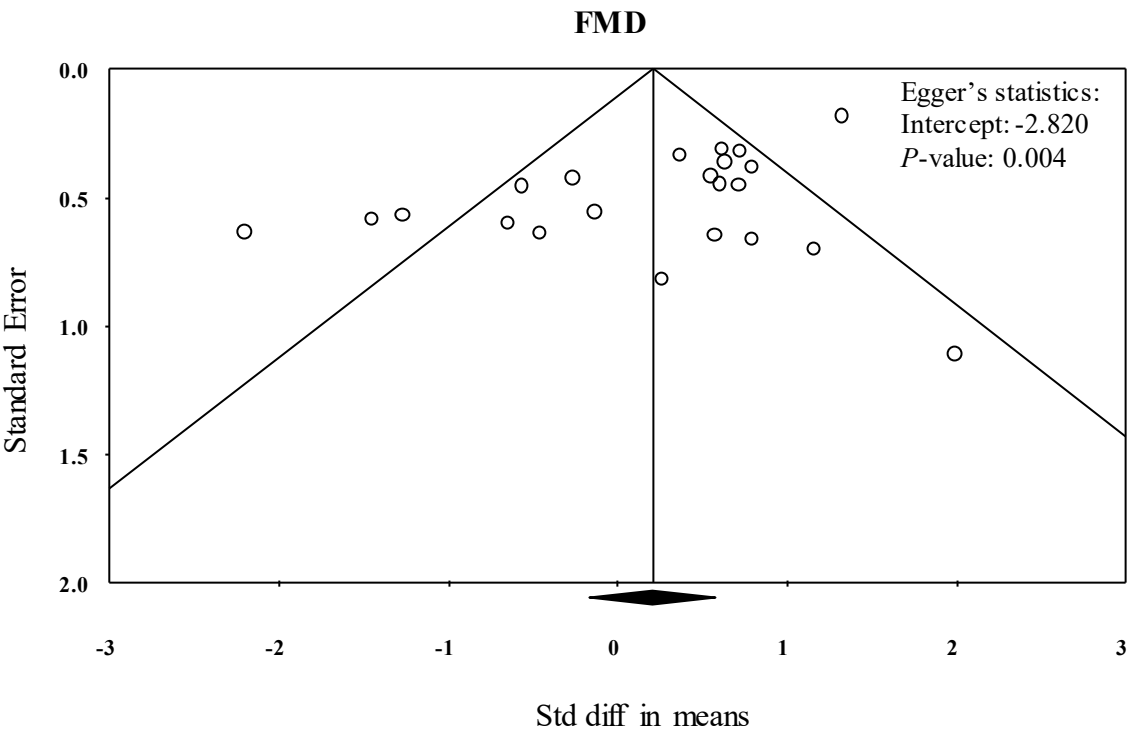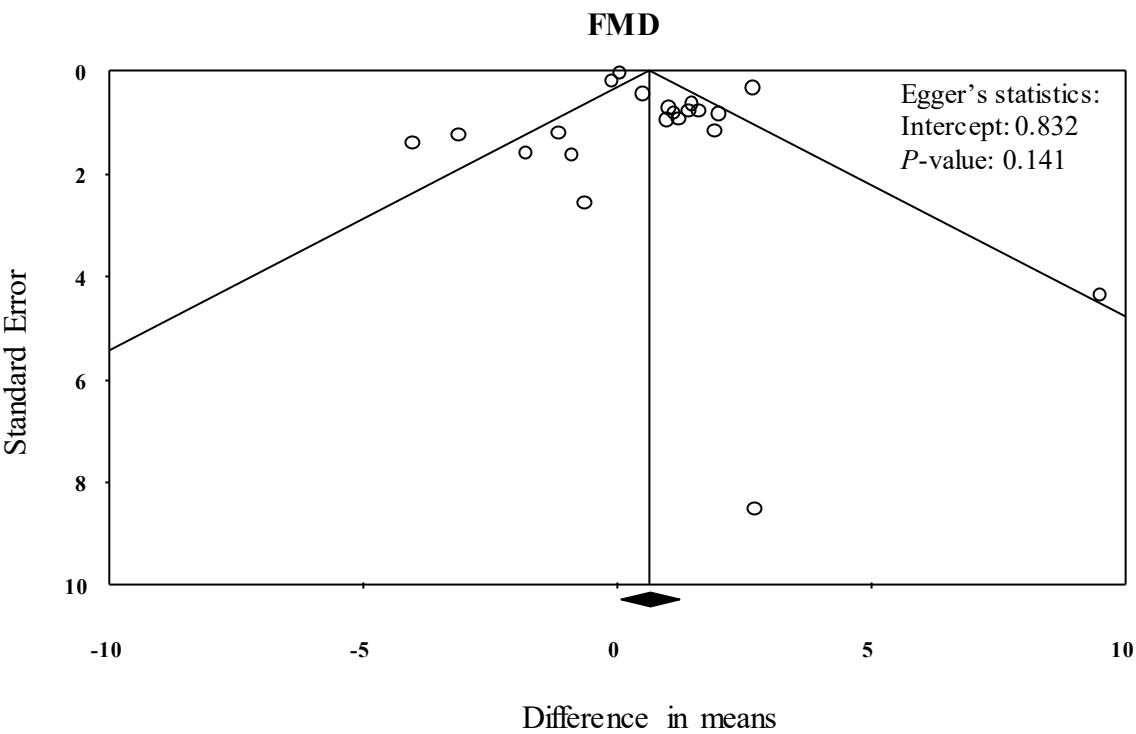

**Supplementary Figure S28.** Forest plot of the meta-analysis evaluating the effects of a prolonged supplementation with ellagitannins and anthocyanins-containing products on glucose. A total of 67 studies (displayed in alphabetical order) were analysed. Pooled results are shown at the bottom using a random-effects model. SDM: standardized difference in means, SE: standard error, 95% CI: lower and upper confidence limits for the average SDM, RW: relative weight.

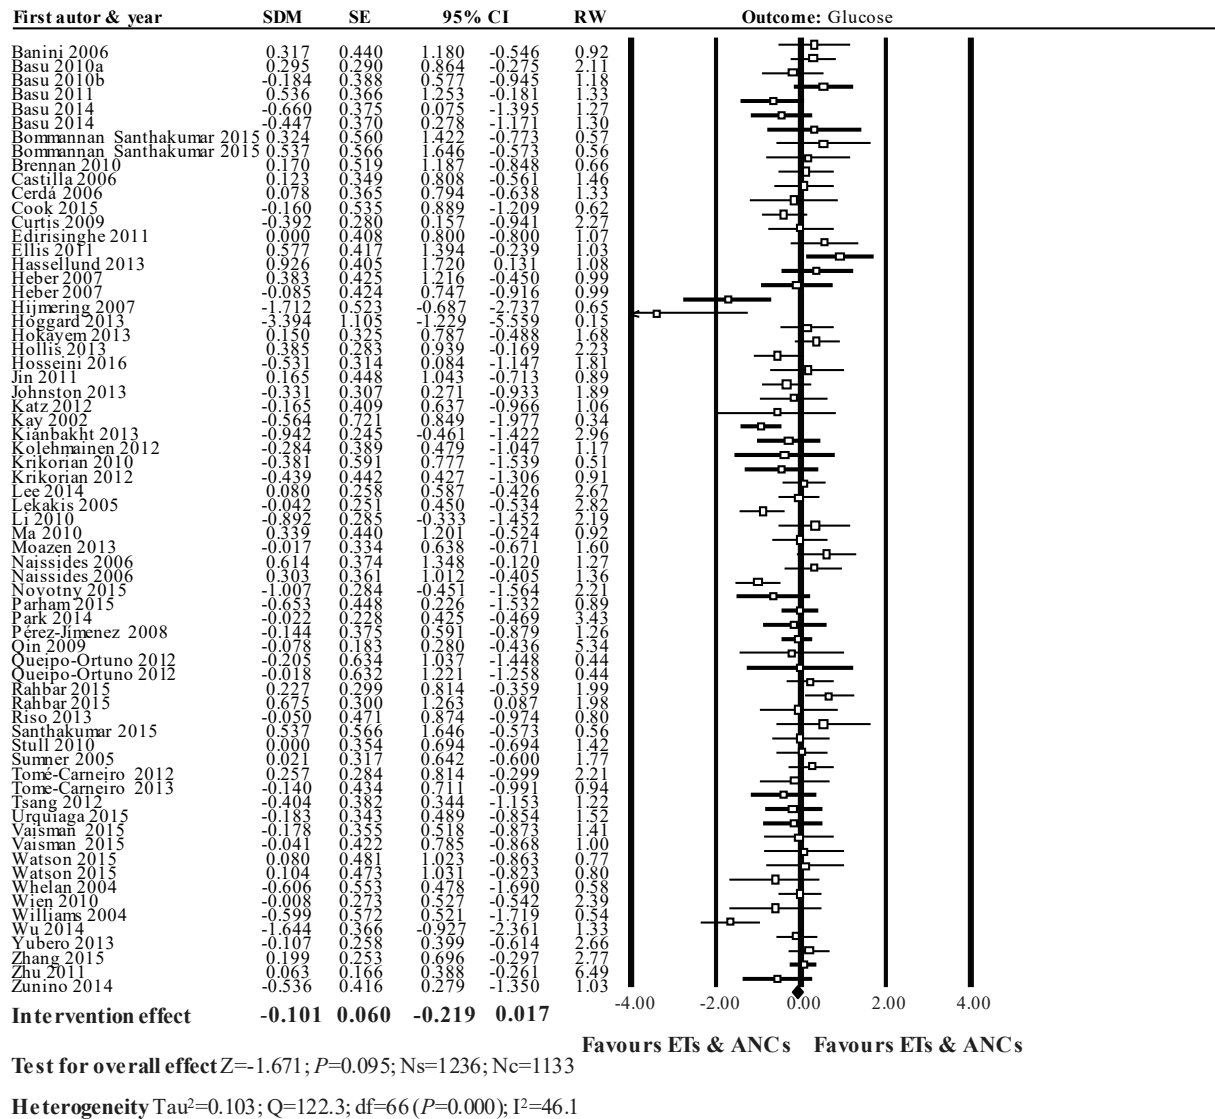

**Supplementary Figure S29.-** Forest plot of the meta-analysis evaluating the effects of a prolonged supplementation with ellagitannins and anthocyanins-containing products on glucose. A total of 60 studies (displayed in alphabetical order) were analysed. Pooled results are shown at the bottom using a random-effects model. DM: Difference in means, SE: standard error, 95% CI: lower and upper confidence limits for the average DM, RW: relative weight.

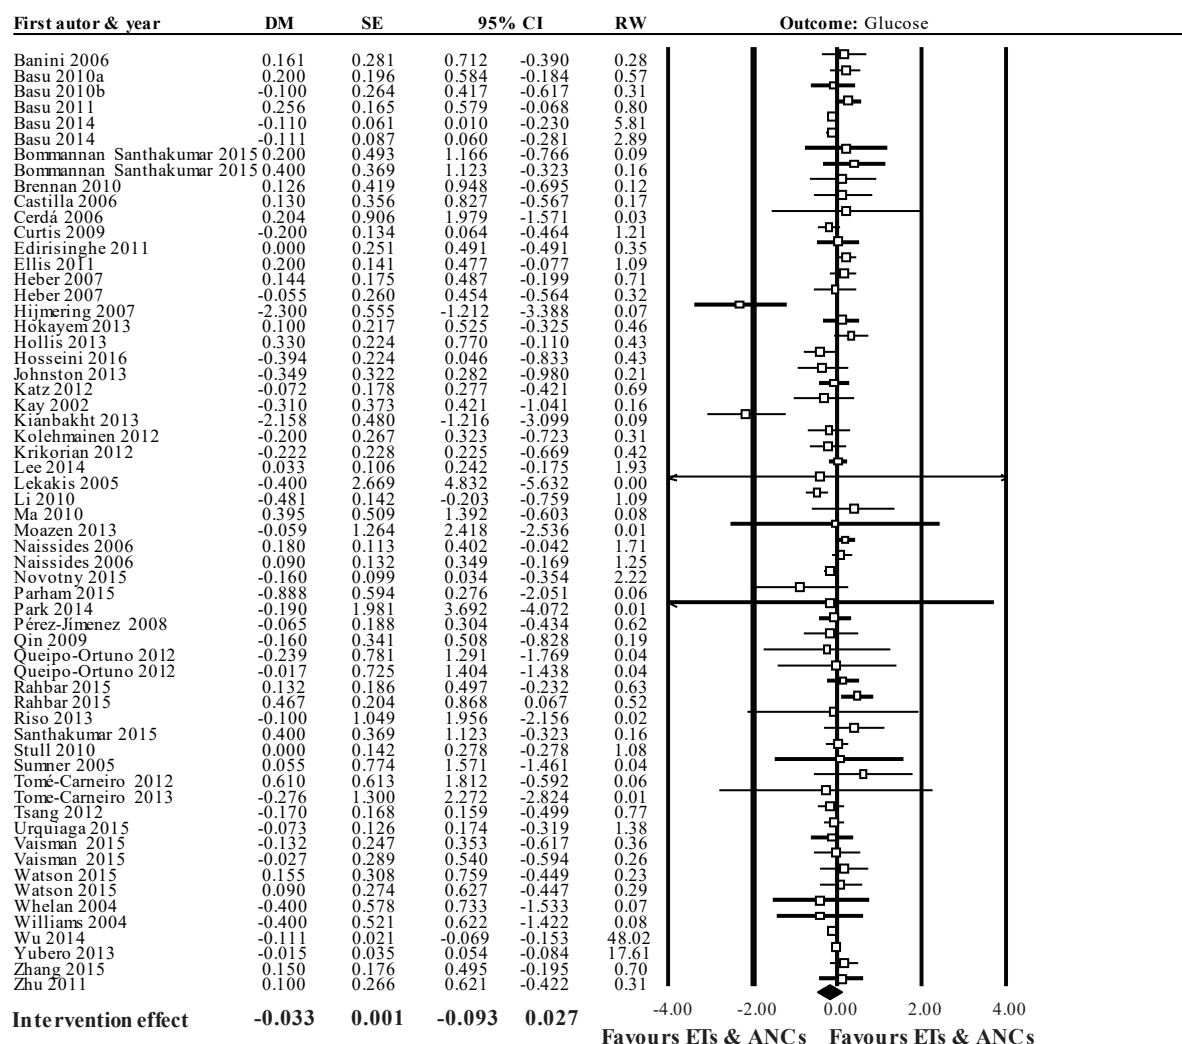

Test for overall effect  $Z=-1.086$ ;  $P=0.277$ ;  $N_s=1156$ ;  $N_c=1054$

Heterogeneity  $\tau^2=0.012$ ;  $Q=99.4$ ;  $df=59$  ( $P=0.001$ );  $I^2=40.6$

**Supplementary Figure S30.** Funnel plots and Egger statistics (intercept and 2-tailed *P*-value) of the meta-analysis evaluating the effects of a prolonged supplementation with ellagitannins and anthocyanins-containing products on glucose.

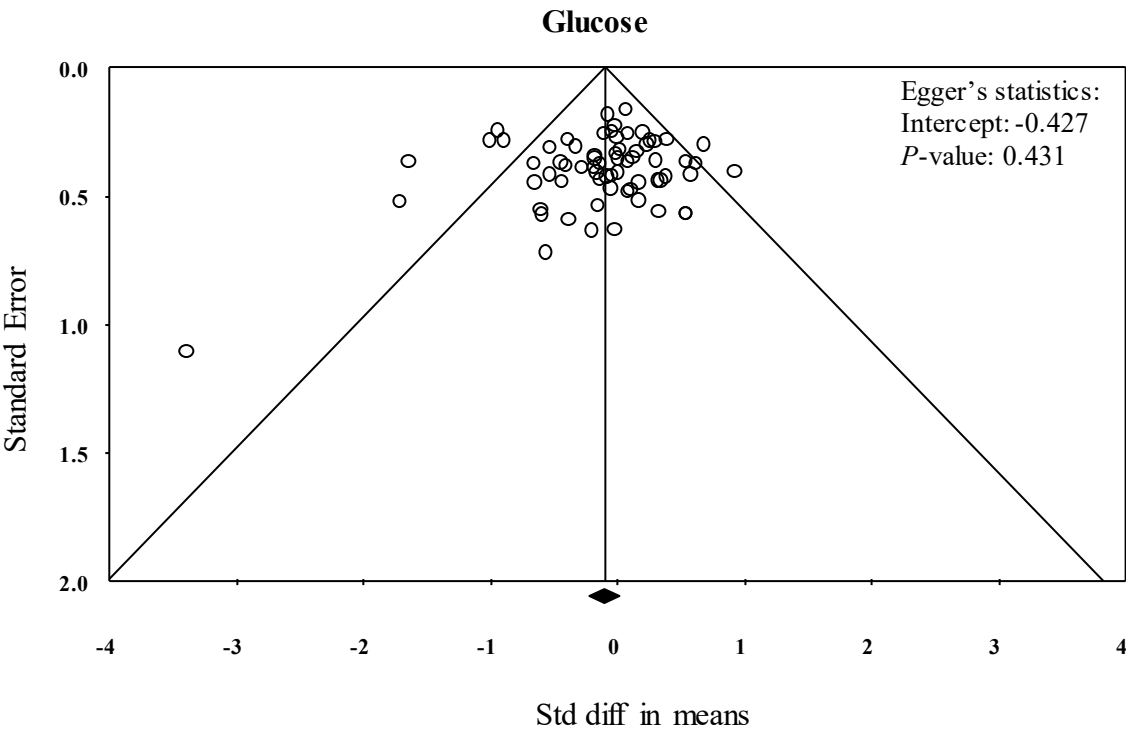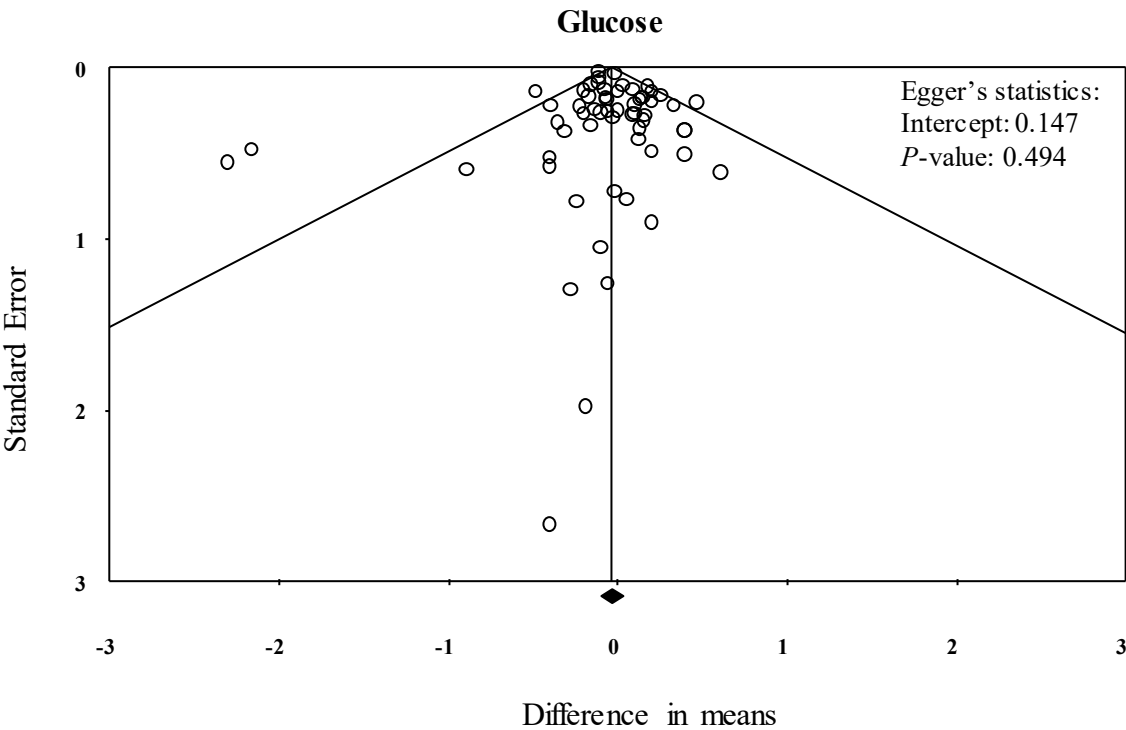

**Supplementary Figure S31.** Forest plot of the meta-analysis evaluating the effects of a prolonged supplementation with ellagitannins and anthocyanins-containing products on insulin. A total of 34 studies (displayed in alphabetical order) were analysed. Pooled results are shown at the bottom using a random-effects model. SDM: standardized difference in means, SE: standard error, 95% CI: lower and upper confidence limits for the average SDM, RW: relative weight.

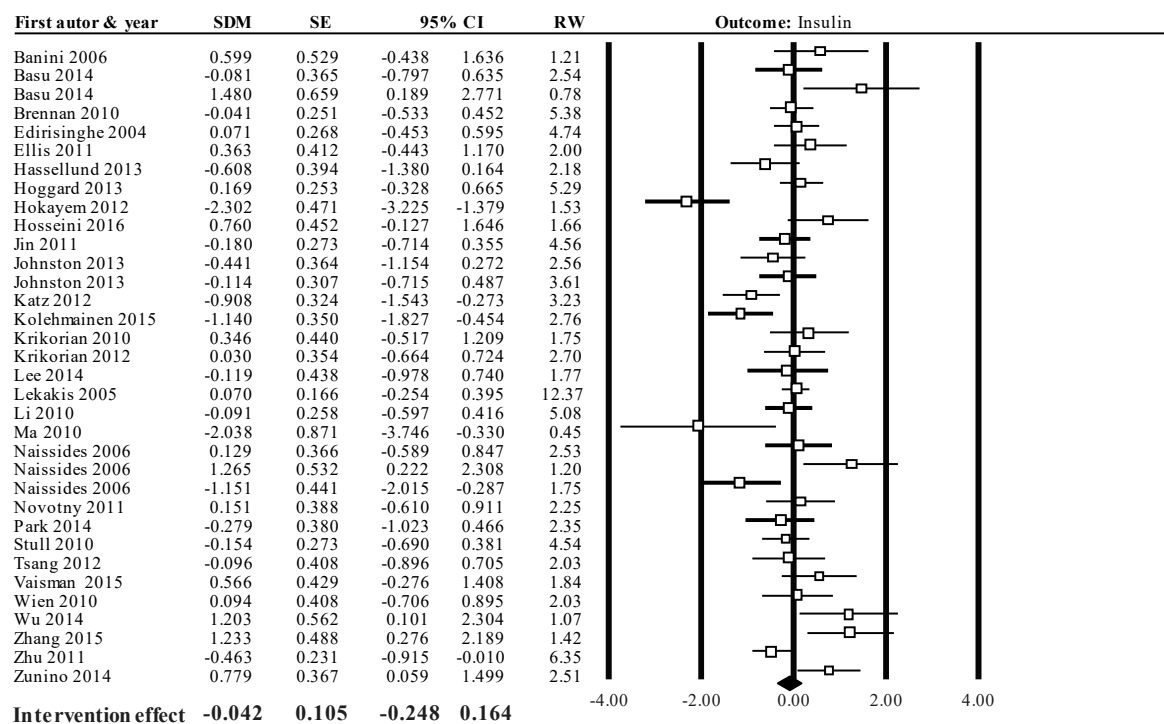

Test for overall effect  $Z=-0.402$ ;  $P=0.688$ ;  $Ns=612$ ;  $Nc=624$

Heterogeneity  $\tau^2=0.229$ ;  $Q=97.3$ ;  $df=33$  ( $P=0.000$ );  $I^2=66.1$

**Supplementary Figure S32.-** Forest plot of the meta-analysis evaluating the effects of a prolonged supplementation with ellagitannins and anthocyanins-containing products on insulin. A total of 24 studies (displayed in alphabetical order) were analysed. Pooled results are shown at the bottom using a random-effects model. DM: Difference in means, SE: standard error, 95% CI: lower and upper confidence limits for the average DM, RW: relative weight.

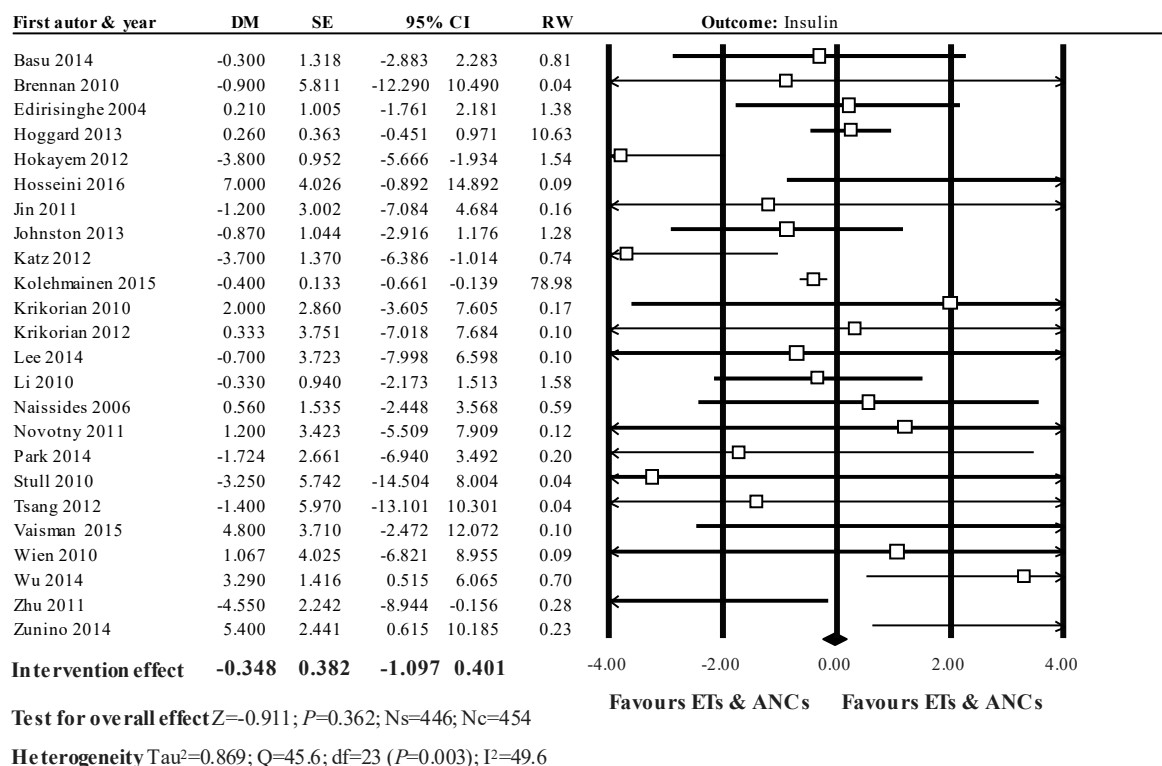



**Supplementary Figure S33.** Funnel plots and Egger statistics (intercept and 2-tailed *P*-value) of the meta-analysis evaluating the effects of a prolonged supplementation with ellagitannins and anthocyanins-containing products on insulin.

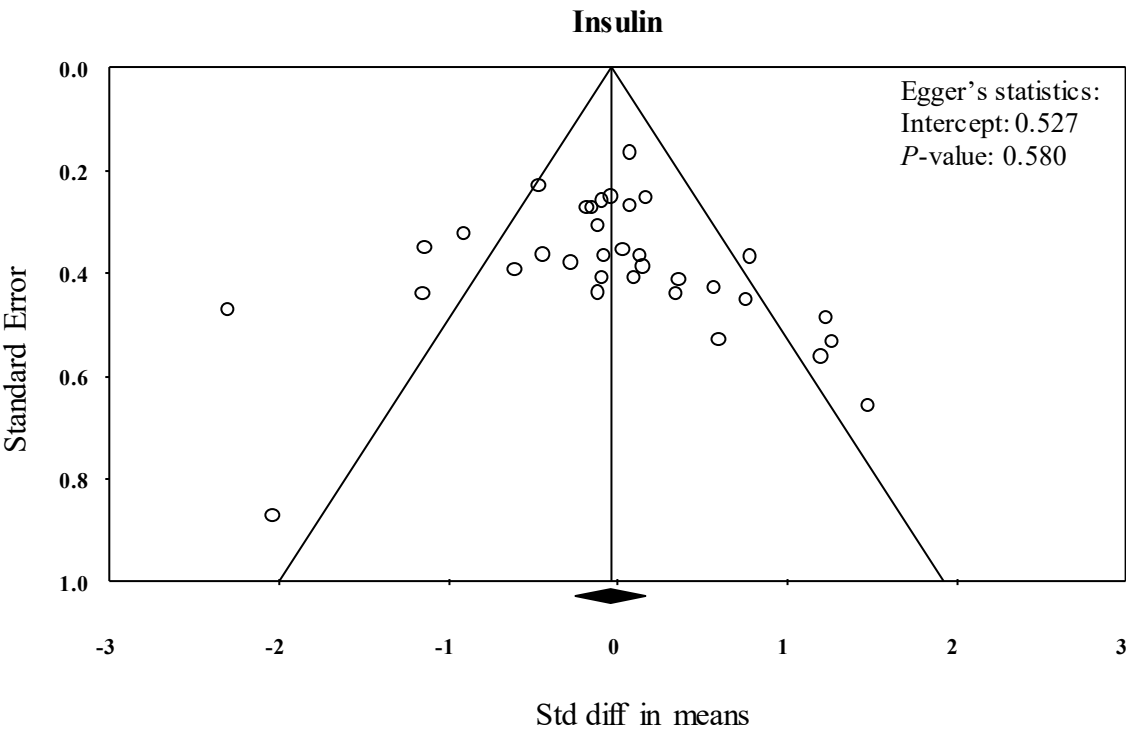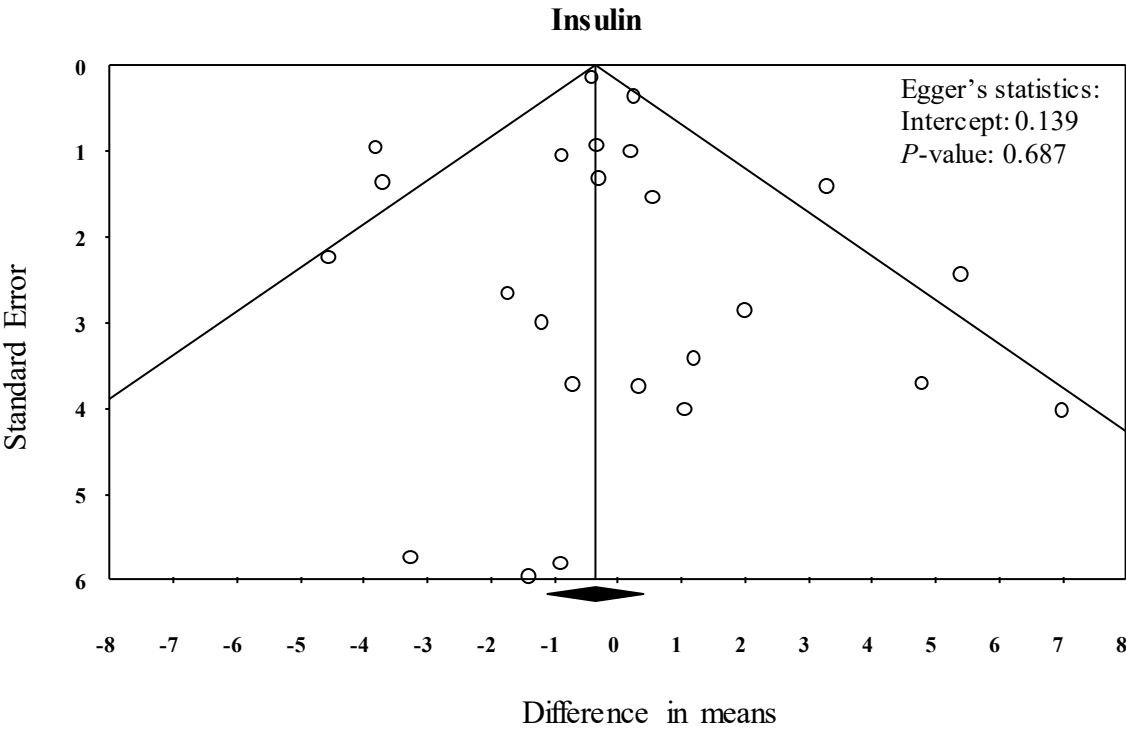

**Supplementary Figure S34.** Forest plot of the meta-analysis evaluating the effects of a prolonged supplementation with ellagitannins and anthocyanins-containing products on Hb1Ac. A total of 20 studies (displayed in alphabetical order) were analysed. Pooled results are shown at the bottom using a random-effects model. SDM: standardized difference in means, SE: standard error, 95% CI: lower and upper confidence limits for the average SDM, RW: relative weight.

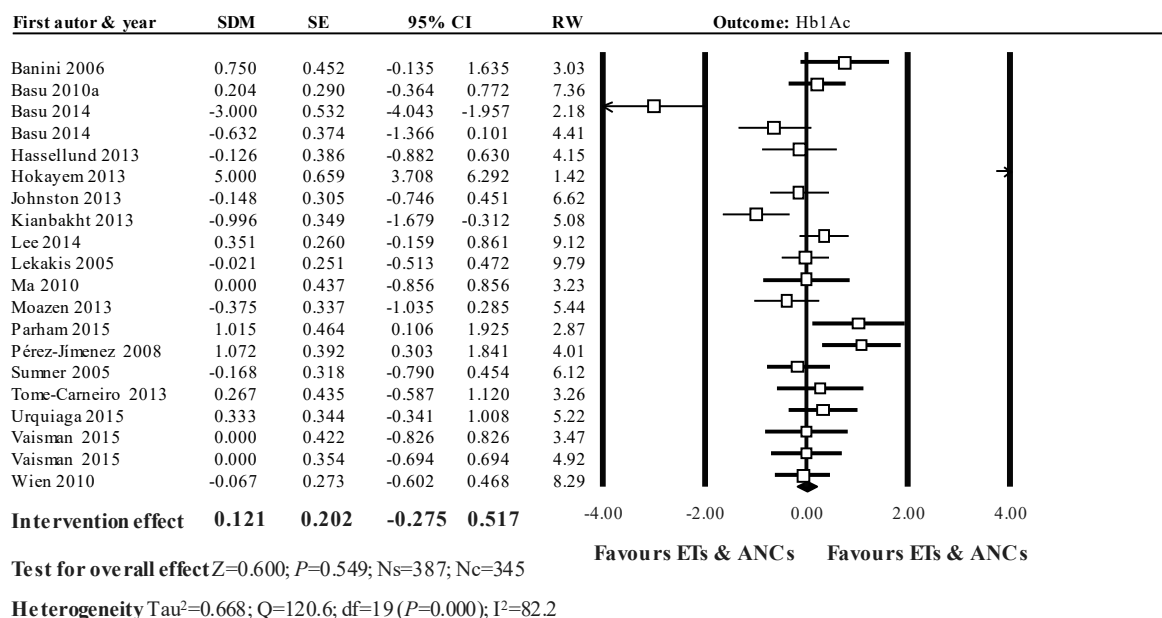

**Supplementary Figure S35.-** Forest plot of the meta-analysis evaluating the effects of a prolonged supplementation with ellagitannins and anthocyanins-containing products on Hb1Ac. A total of 19 studies (displayed in alphabetical order) were analysed. Pooled results are shown at the bottom using a random-effects model. DM: Difference in means, SE: standard error, 95% CI: lower and upper confidence limits for the average DM, RW: relative weight.

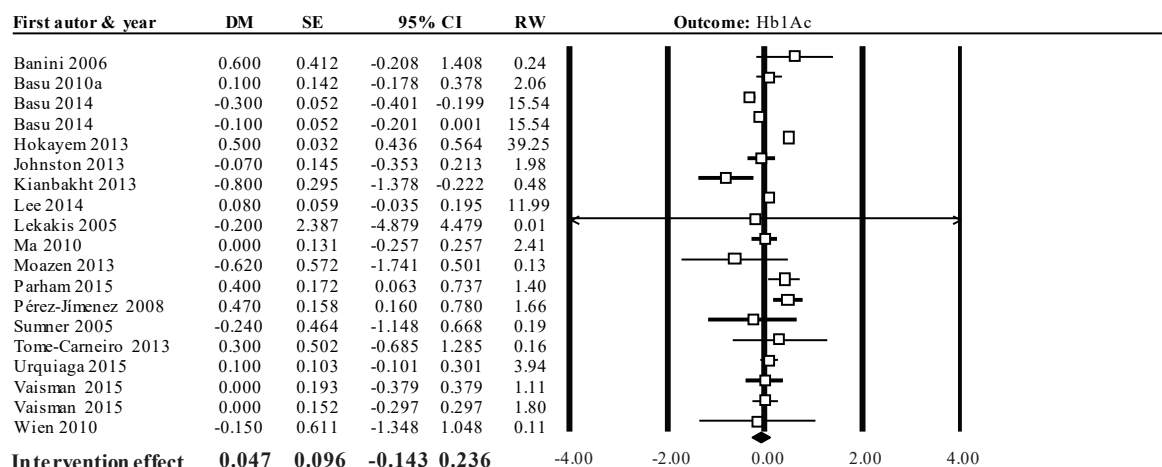

Test for overall effect  $Z=0.482$ ;  $P=0.629$ ;  $Ns=374$ ;  $Nc=331$

Heterogeneity  $\tau^2=0.120$ ;  $Q=242.9$ ;  $df=18$  ( $P=0.000$ );  $I^2=92.6$

**Supplementary Figure S36.** Funnel plots and Egger statistics (intercept and 2-tailed *P*-value) of the meta-analysis evaluating the effects of a prolonged supplementation with ellagitannins and anthocyanins-containing products on glycated haemoglobin (Hb1Ac).

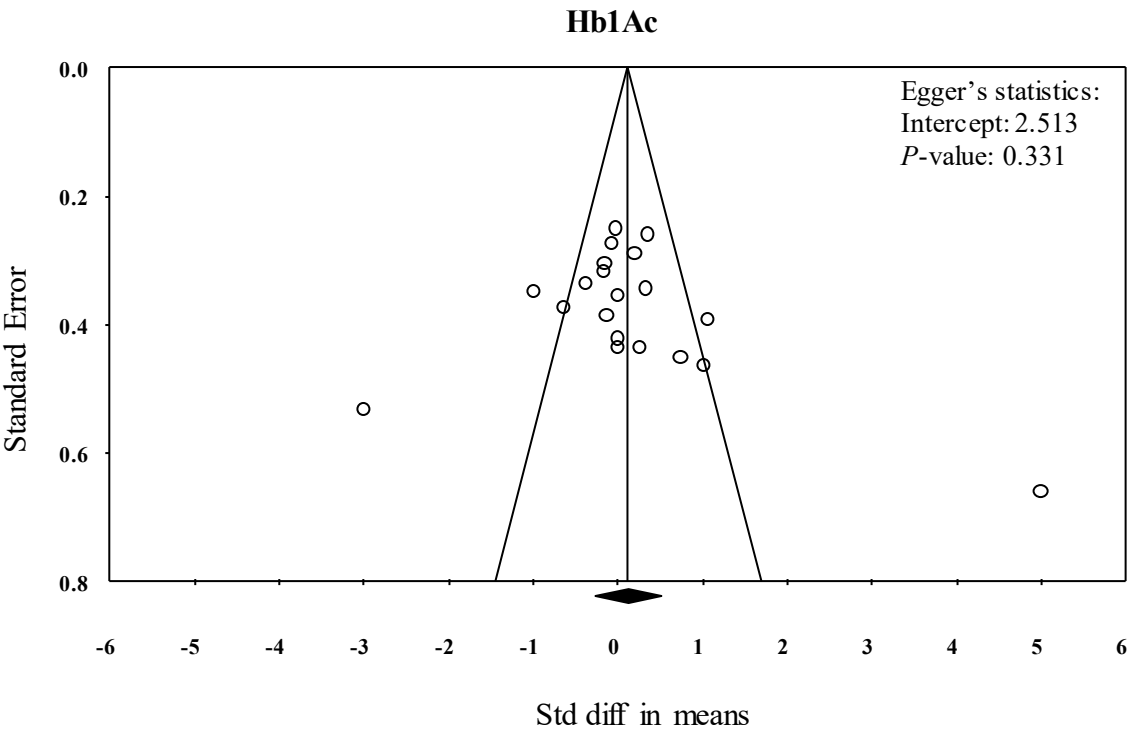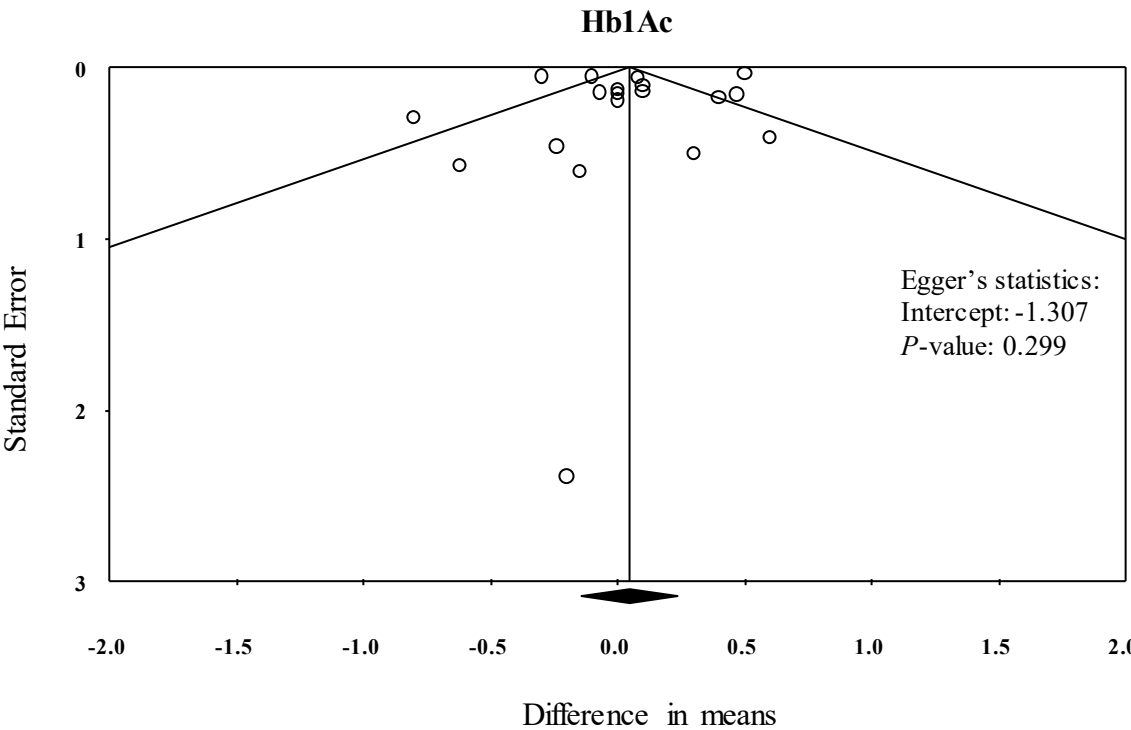

**Supplementary Figure S37.** Forest plot of the meta-analysis evaluating the effects of a prolonged supplementation with ellagitannins and anthocyanins-containing products on HOMA-IR. A total of 18 studies (displayed in alphabetical order) were analysed. Pooled results are shown at the bottom using a random-effects model. SDM: standardized difference in means, SE: standard error, 95% CI: lower and upper confidence limits for the average SDM, RW: relative weight.

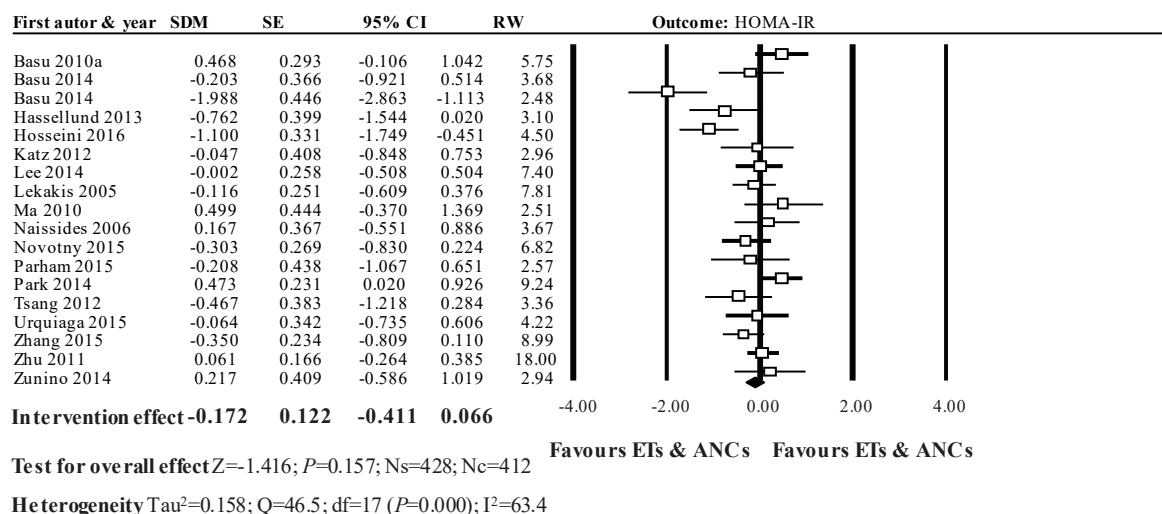

**Supplementary Figure S38.-** Forest plot of the meta-analysis evaluating the effects of a prolonged supplementation with ellagitannins and anthocyanins-containing products on HOMA-IR. A total of 15 studies (displayed in alphabetical order) were analysed. Pooled results are shown at the bottom using a random-effects model. DM: Difference in means, SE: standard error, 95% CI: lower and upper confidence limits for the average DM, RW: relative weight.

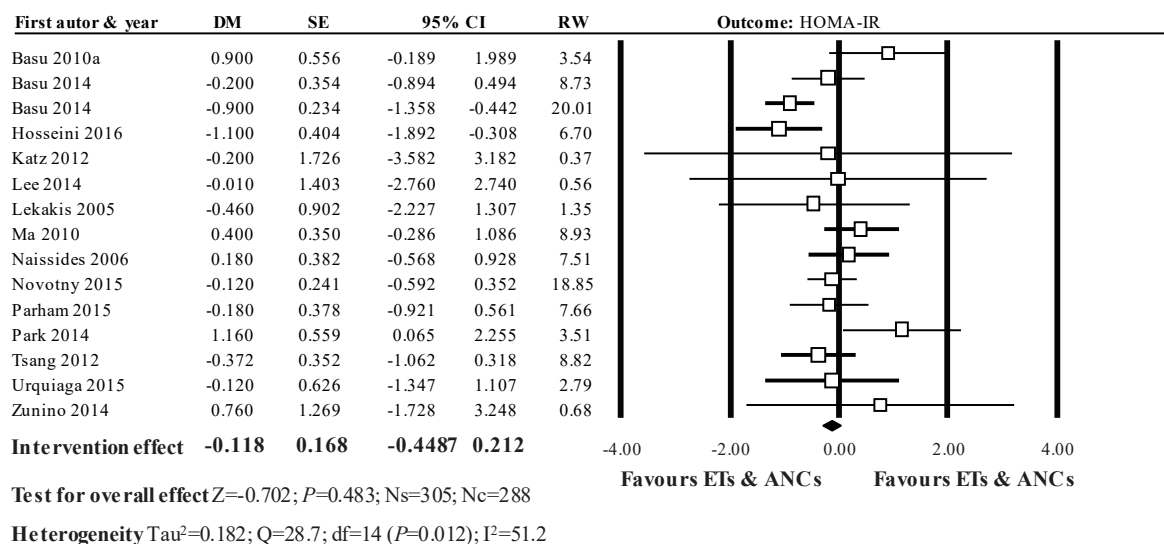

**Supplementary Figure S39.** Funnel plots and Egger statistics (intercept and 2-tailed *P*-value) of the meta-analysis evaluating the effects of a prolonged supplementation with ellagitannins and anthocyanins-containing products on homeostatic model assessment of insulin resistance (HOMA-IR).

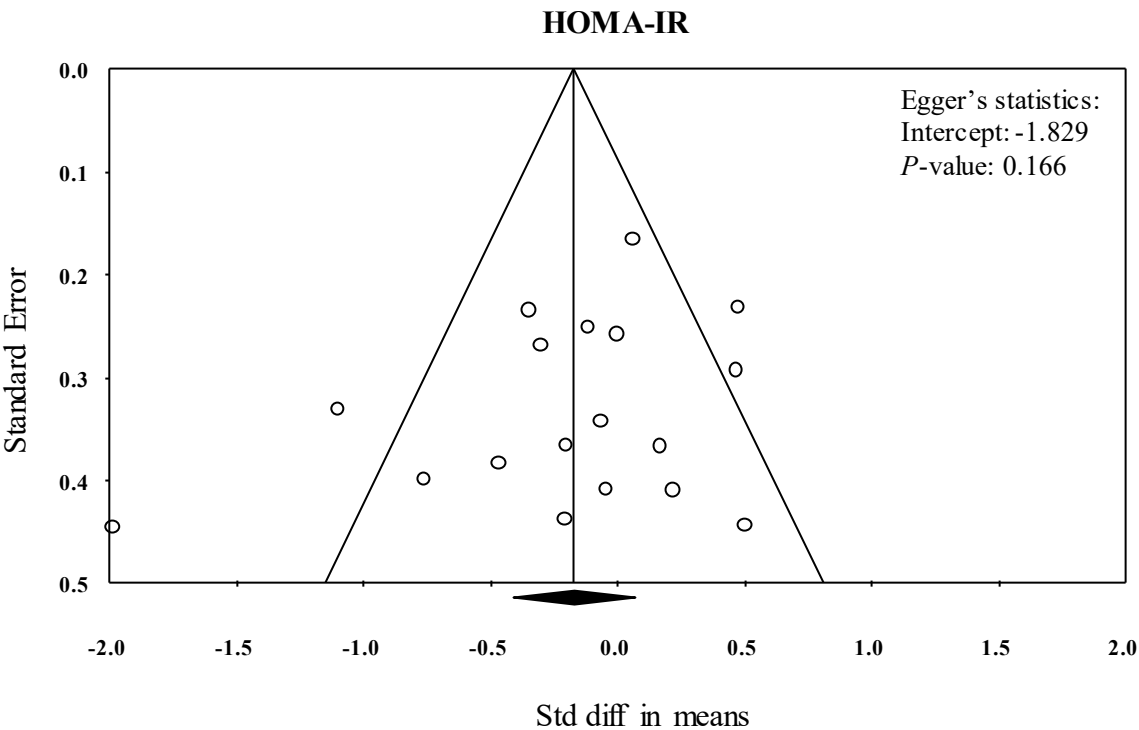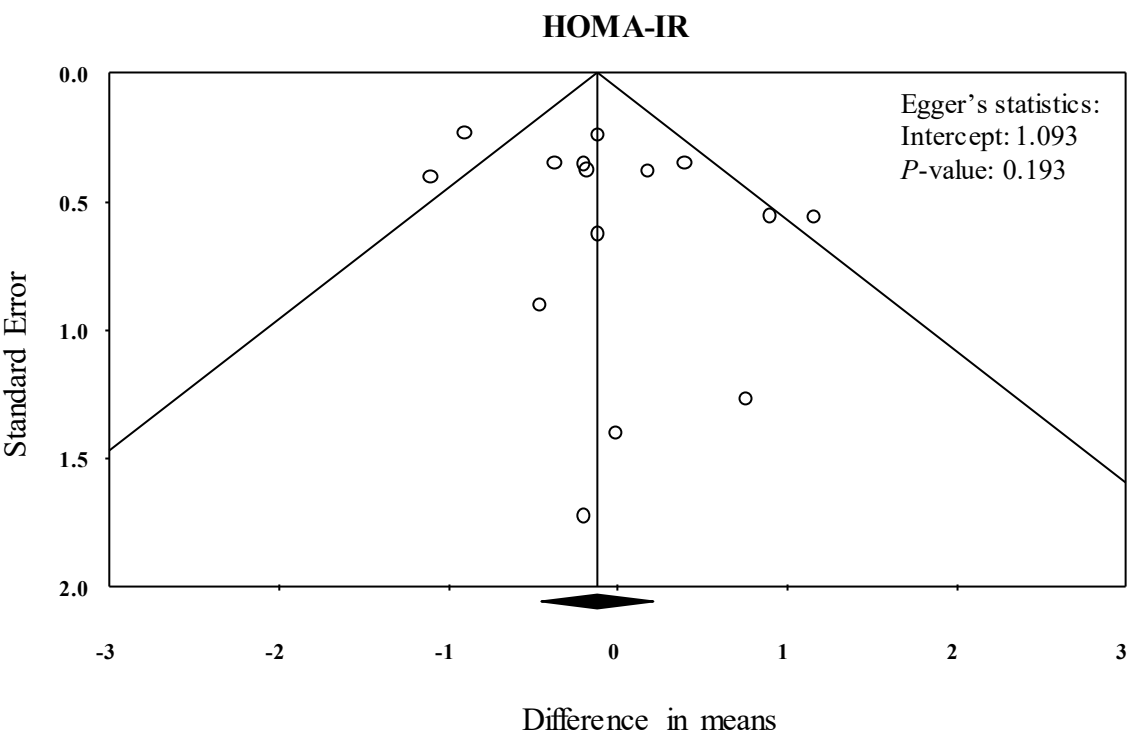

Supplement: s1 [file s1]
