# Supplementary material for: Meta-Analysis of the Effects of Foods and Derived Products Containing Ellagitannins and Anthocyanins on Cardiometabolic Biomarkers: Analysis of Factors Influencing Variability of the Individual Responses
Source: MDPI journal article supplement (doi:10.3390/ijms19030694), 2018-02-28
Supplement: s1 [file s1]

**Supplementary Table S5.** Stratification by the baseline BMI of the study participants: influence on the effect estimations (SDM) and size effect estimations (DM) of the impact of ellagitannins (ETs: pomegranate, nuts) and of anthocyanins (ANCs: berries, red grapes, red wine) containing foods and products on a range of cardiovascular risk associated biomarkers.

| BMI                          | ETs                      |                         |                            |                             | ANCs                     |                         |                            |                            |
|------------------------------|--------------------------|-------------------------|----------------------------|-----------------------------|--------------------------|-------------------------|----------------------------|----------------------------|
|                              | < 25.0 Kg/m <sup>2</sup> |                         | ≥ 25.0 Kg/m <sup>2</sup>   |                             | < 25.0 Kg/m <sup>2</sup> |                         | ≥ 25.0 Kg/m <sup>2</sup>   |                            |
|                              | SDM<br>(S, n, <i>P</i> ) | DM<br>(S, n, <i>P</i> ) | SDM<br>(S, n, <i>P</i> )   | DM<br>(S, n, <i>P</i> )     | SDM<br>(S, n, <i>P</i> ) | DM<br>(S, n, <i>P</i> ) | SDM<br>(S, n, <i>P</i> )   | DM<br>(S, n, <i>P</i> )    |
| BMI<br>(Kg/m <sup>2</sup> )* | -                        | -                       | -0.09<br>(NS, 13, 0.00)    | -0.003<br>(NS, 11, 0.00)    | -0.03<br>(NS, 1, 0.00)   | -0.10<br>(NS, 1, 0.00)  | -0.05<br>(NS, 21, 0.00)    | -0.008<br>(NS, 20, 0.00)   |
| WC<br>(cm)                   | -                        | -                       | -0.70<br>(NS, 4, 88.8)     | -1.71<br>(0.047, 3, 46.6)   | -                        | -                       | -0.11<br>(NS, 10, 0.00)    | -0.70<br>(NS, 10, 0.00)    |
| T-C (mmol/L)                 | -0.34<br>(NS, 1, 0.00)   | -0.13<br>(NS, 1, 0.00)  | -0.12<br>(NS, 20, 33.8)    | -0.08<br>(0.000, 18, 0.00)  | +0.14<br>(NS, 6, 0.00)   | +0.14<br>(NS, 6, 0.00)  | -0.34<br>(0.003, 35, 74.1) | -0.23<br>(0.009, 35, 81.3) |
| LDL-C<br>(mmol/L)            | -0.38<br>(NS, 1, 0.00)   | -0.16<br>(NS, 1, 0.00)  | -0.15<br>(NS, 20, 56.9)    | -0.11,<br>(0.000, 18, 0.00) | -0.10<br>(NS, 5, 0.00)   | -0.11<br>(NS, 5, 0.00)  | -0.13<br>(NS, 30, 69.7)    | -0.11<br>(NS, 29, 82.7)    |
| HDL-C<br>(mmol/L)            | -0.06<br>(NS, 1, 0.00)   | -0.01<br>(NS, 1, 0.00)  | +0.06<br>(NS, 17, 36.2)    | +0.008<br>(NS, 15, 0.00)    | +0.10<br>(NS, 5, 0.00)   | +0.02<br>(NS, 5, 0.00)  | +0.02<br>(NS, 31, 72.5)    | +0.02<br>(NS, 30, 82.0)    |
| TAGs<br>(mmol/L)             | +0.13<br>(NS, 1, 0.00)   | +0.10<br>(NS, 1, 0.00)  | -0.21<br>(NS, 19, 70.2)    | -0.11<br>(0.000, 17, 0.00)  | +0.14<br>(NS, 5, 0.00)   | +0.06<br>(NS, 5, 0.00)  | -0.05<br>(NS, 28, 65.6)    | -0.05<br>(NS, 27, 60.0)    |
| SBP<br>(mm Hg)               | +0.18<br>(NS, 3, 72.6)   | -                       | -0.26<br>(0.012, 14, 35.2) | -3.10<br>(0.033, 11, 39.6)  | +0.03<br>(NS, 13, 45.1)  | +1.38<br>(NS, 9, 0.00)  | -0.25<br>(0.000, 43, 0.58) | -1.54<br>(0.000, 38, 0.00) |
| DBP<br>(mm Hg)               | -                        | -                       | -0.08<br>(NS, 15, 38.5)    | -0.55<br>(NS, 14, 31.1)     | +0.01<br>(NS, 12, 0.00)  | +0.33<br>(NS, 11, 0.00) | -0.22<br>(0.002, 30, 22.9) | -1.62<br>(0.000, 29, 21.9) |
| FMD<br>(%)                   | -                        | -                       | +0.62<br>(0.014, 3, 0.00)  | +0.39<br>(NS, 3, 40.8)      | +0.14<br>(NS, 8, 66.5)   | +0.75<br>(NS, 7, 50.0)  | -0.20<br>(NS, 6, 89.5)     | -0.65<br>(NS, 6, 89.7)     |
| Glucose<br>(mmol/L)          | -                        | -                       | -0.19<br>(0.058, 14, 11.0) | -0.18<br>(0.017, 13, 9.2)   | -0.14<br>(NS, 5, 0.00)   | -0.08<br>(NS, 5, 0.00)  | -0.13<br>(NS, 22, 45.1)    | -0.02<br>(NS, 20, 44.8)    |
| Insulin<br>(mIU/L)           | -                        | -                       | -0.17<br>(NS, 10, 45.5)    | -1.03<br>(NS, 8, 19.5)      | -                        | -                       | +0.14<br>(NS, 9, 65.3)     | +0.06<br>(NS, 7, 44.5)     |
| Hb1Ac                        | -                        | -                       | +0.03<br>(NS, 5, 25.3)     | +0.06<br>(NS, 5, 26.7)      | -                        | -                       | -0.55<br>(NS, 7, 83.3)     | -0.12<br>(NS, 7, 68.9)     |
| HOMA-IR                      | -                        | -                       | -0.14<br>(NS, 6, 72.3)     | -0.08<br>(NS, 6, 64.0)      | -                        | -                       | -0.35<br>(NS, 4, 86.5)     | -0.10<br>(NS, 4, 72.7)     |

BMI: Body Mass Index; WC: Waist Circumference; T-C: Total Cholesterol; LDL-C: Low density Lipoprotein Cholesterol; HDL-C: High Density Lipoprotein Cholesterol; TAGs: Triacylglycerols; SBP: Systolic Blood Pressure; DBP: Diastolic Blood Pressure; FMD: Flow Mediated Dilation; Hb1Ac: Glycated Haemoglobin; HOMA-IR: Homeostatic Model Assessment of Insulin Resistance; SDM: standardized difference in means; DM: Difference in means; n: total number of studies included in the analysis; *P*: heterogeneity index; Q-value: between-categories Q statistic. \*: Units refer to the size effect estimation (DM); S: Significance of the analysis; NS: not significant, *P*-values < 0.05 were significant and indicated. *P*-values: 0.05 ≤ *P*-value < 0.1 were considered marginally significant and are also indicated.
