# Supplementary material for: Meta-Analysis of the Effects of Foods and Derived Products Containing Ellagitannins and Anthocyanins on Cardiometabolic Biomarkers: Analysis of Factors Influencing Variability of the Individual Responses
Source: MDPI journal article supplement (doi:10.3390/ijms19030694), 2018-02-28
Supplement: s1 [file s1]

**Supplementary Table S7.** Stratification by the smoking habits: influence on the effects estimations (SDM, DM) of the impact of ellagitannins (ETs: pomegranate, nuts) and of anthocyanins (ANCs: berries, red grapes, red wine) containing foods and products on a range of cardiovascular risk associated biomarkers.

| Sex                   | ETs                      |                         |                          |                         | ANCs                     |                         |                          |                         |
|-----------------------|--------------------------|-------------------------|--------------------------|-------------------------|--------------------------|-------------------------|--------------------------|-------------------------|
|                       | Non-Smokers              |                         | Smokers                  |                         | Non-Smokers              |                         | Smokers                  |                         |
|                       | SDM<br>(S, n, <i>P</i> ) | DM<br>(S, n, <i>P</i> ) | SDM<br>(S, n, <i>P</i> ) | DM<br>(S, n, <i>P</i> ) | SDM<br>(S, n, <i>P</i> ) | DM<br>(S, n, <i>P</i> ) | SDM<br>(S, n, <i>P</i> ) | DM<br>(S, n, <i>P</i> ) |
| BMI                   | +0.08                    | +0.12                   | -                        | -                       | -0.08                    | -0.06                   | +0.17                    | +0.80                   |
| (Kg/m <sup>2</sup> )* | (NS, 6, 0.00*)           | (NS, 5, 0.00)           |                          |                         | (NS, 9, 0.00)            | (NS, 8, 0.00)           | (NS, 1, 0.00)            | (NS, 1, 0.00)           |
| WC                    | -0.89                    | -1.72                   | -                        | -                       | -0.15                    | -0.83                   | +0.10                    | +0.90                   |
| (cm)                  | (NS, 3, 91.1)            | (0.047, 3, 46.6)        |                          |                         | (NS, 7, 26.5)            | (NS, 7, 24.7)           | (NS, 1, 0.00)            | (NS, 1, 0.00)           |
| T-C                   | -0.11                    | -0.10                   | -                        | -                       | -0.15                    | -0.05                   | +0.03                    | +0.01                   |
| (mmol/L)              | (NS, 10, 0.00)           | (NS, 10, 0.00)          |                          |                         | (NS, 30, 52.9)           | (NS, 28, 75.1)          | (NS, 3, 0.00)            | (NS, 3, 0.00)           |
| LDL-C                 | -0.17                    | -0.11                   | -                        | -                       | -0.02                    | -0.002                  | +0.01                    | +0.01                   |
| (mmol/L)              | (NS, 8, 0.00)            | (0.081, 8, 0.00)        |                          |                         | (NS, 27, 71.8)           | (NS, 25, 82.8)          | (NS, 3, 0.00)            | (NS, 3, 0.00)           |
| HDL-C                 | +0.03                    | +0.01                   | -                        | -                       | +0.13                    | +0.03                   | -0.15                    | -0.06                   |
| (mmol/L)              | (NS, 8, 0.00)            | (NS, 8, 0.00)           |                          |                         | (NS, 30, 51.2)           | (NS, 27, 59.6)          | (NS, 3, 0.00)            | (NS, 3, 0.00)           |
| TAGs                  | -0.09                    | -0.07                   | -                        | -                       | -0.003                   | -0.05                   | -0.44                    | -0.32                   |
| (mmol/L)              | (NS, 9, 0.00)            | (NS, 9, 0.00)           |                          |                         | (NS, 26, 49.4)           | (NS, 22, 0.00)          | (NS, 3, 84.5)            | (NS, 3, 0.00)           |
| SBP                   | -0.05                    | -0.18                   | -                        | -                       | -0.26                    | -1.99                   | -0.42                    | +1.80                   |
| (mm Hg)               | (NS, 10, 27.7)           | (NS, 8, 0.00)           |                          |                         | (0.008, 29, 53.3)        | (0.025, 27, 12.5)       | (NS, 3, 66.3)            | (NS, 1, 0.00)           |
| DBP                   | -0.27                    | -2.14                   | -                        | -                       | -0.19                    | -1.28                   | -0.10                    | -1.01                   |
| (mm Hg)               | (0.035, 9, 32.0)         | (0.092, 9, 49.0)        |                          |                         | (0.041, 30, 58.8)        | (0.043, 28, 44.6)       | (NS, 3, 0.00)            | (NS, 2, 0.00)           |
| FMD                   | +0.62                    | +0.39                   | -                        | -                       | +0.19                    | +0.53                   | -1.61                    | -3.53                   |
| (%)                   | (0.014, 3, 0.00)         | (NS, 3, 40.8)           |                          |                         | (NS, 7, 80.8)            | (NS, 7, 90.3)           | (0.000, 3, 0.00)         | (0.000, 2, 0.00)        |
| Glucose               | -0.37                    | -0.11                   | -                        | -                       | -0.16                    | -0.04                   | -                        | -                       |
| (mmol/L)              | (NS, 5, 75.8)            | (0.000, 5, 0.00)        |                          |                         | (NS, 25, 56.4)           | (NS, 24, 60.5)          |                          |                         |
| Insulin               | -0.36                    | -0.45                   | -                        | -                       | +0.17                    | +0.21                   | -                        | -                       |
| (mIU/L)               | (NS, 5, 73.3)            | (NS, 3, 84.3)           |                          |                         | (NS, 10, 66.7)           | (NS, 6, 46.3)           |                          |                         |
| Hb1Ac                 | -0.13                    | -0.04                   | -                        | -                       | -0.58                    | -0.10                   | -                        | -                       |
|                       | (NS, 3, 0.00)            | (NS, 3, 0.00)           |                          |                         | (NS, 6, 89.0)            | (NS, 6, 84.9)           |                          |                         |
| HOMA-IR               | +0.20                    | +0.38                   | -                        | -                       | -0.17                    | -0.11                   | -                        | -                       |
|                       | (NS, 2, 0.00)            | (NS, 2, 0.00)           |                          |                         | (NS, 7, 75.3)            | (NS, 6, 64.7)           |                          |                         |

BMI: Body Mass Index; WC: Waist Circumference; T-C: Total Cholesterol; LDL-C: Low density Lipoprotein Cholesterol; HDL-C: High Density Lipoprotein Cholesterol; TAGs: Triacylglycerols; SBP: Systolic Blood Pressure; DBP: Diastolic Blood Pressure; FMD: Flow Mediated Dilation; Hb1Ac: Glycated Haemoglobin; HOMA-IR: Homeostatic Model Assessment of Insulin Resistance; SDM: standardized difference in means; DM: Difference in means; n: total number of studies included in the analysis; *P*: heterogeneity index; Q-value: between-categories Q statistic. \*: Units refer to the size effect estimation (DM); S: Significance of the analysis; NS: not significant, *P*-values < 0.05 were significant and indicated. *P*-values: 0.05 ≤ *P*-value < 0.1 were considered marginally significant and are also indicated.
