# Supplementary material for: Meta-Analysis of the Effects of Foods and Derived Products Containing Ellagitannins and Anthocyanins on Cardiometabolic Biomarkers: Analysis of Factors Influencing Variability of the Individual Responses
Source: MDPI journal article supplement (doi:10.3390/ijms19030694), 2018-02-28
Supplement: s1 [file s1]

**Supplementary Table S6.** Stratification by sex: influence on the effects estimations (SDM, DM) of the impact of ellagitannins (ETs: pomegranate, nuts) and of anthocyanins (ANCs: berries, red grapes, red wine) containing foods and products on a range of cardiovascular risk associated biomarkers.

| Sex                          | ETs                                   |                                      |                                       |                                      | ANCs                                  |                                      |                                       |                                      |
|------------------------------|---------------------------------------|--------------------------------------|---------------------------------------|--------------------------------------|---------------------------------------|--------------------------------------|---------------------------------------|--------------------------------------|
|                              | Women                                 |                                      | Men                                   |                                      | Women                                 |                                      | Men                                   |                                      |
|                              | SDM<br>(S, n, <i>I</i> <sup>2</sup> ) | DM<br>(S, n, <i>I</i> <sup>2</sup> ) | SDM<br>(S, n, <i>I</i> <sup>2</sup> ) | DM<br>(S, n, <i>I</i> <sup>2</sup> ) | SDM<br>(S, n, <i>I</i> <sup>2</sup> ) | DM<br>(S, n, <i>I</i> <sup>2</sup> ) | SDM<br>(S, n, <i>I</i> <sup>2</sup> ) | DM<br>(S, n, <i>I</i> <sup>2</sup> ) |
| BMI<br>(Kg/m <sup>2</sup> )* | -0.18<br>(NS, 1, 0.00)                | -0.18<br>(NS, 1, 0.00)               | -                                     | -                                    | +0.10<br>(NS, 2, 0.00)                | +0.25<br>(NS, 2, 0.00)               | -0.04<br>(NS, 9, 0.00)                | -0.13<br>(NS, 9, 0.00)               |
| WC<br>(cm)                   | -                                     | -                                    | -                                     | -                                    | -0.45<br>(NS, 1, 0.00)                | -11.5<br>(NS, 1, 0.00)               | -0.05<br>(NS, 2, 0.00)                | -0.7<br>(NS, 2, 0.00)                |
| T-C<br>(mmol/L)              | -0.11<br>(NS, 1, 0.00)                | -0.10<br>(NS, 1, 0.00)               | -0.20<br>(NS, 3, 0.00)                | -0.12<br>(NS, 3, 0.00)               | +0.04<br>(NS, 6, 0.00)                | +0.03<br>(NS, 6, 0.00)               | -0.05<br>(NS, 17, 0.00)               | -0.03<br>(NS, 16, 0.00)              |
| LDL-C<br>(mmol/L)            | -0.12<br>(NS, 1, 0.00)                | -0.06<br>(NS, 1, 0.00)               | -0.15<br>(NS, 3, 0.00)                | -0.12<br>(NS, 3, 0.00)               | -0.18<br>(NS, 3, 0.00)                | -0.14<br>(NS, 3, 0.00)               | +0.08<br>(NS, 16, 0.00)               | +0.17<br>(NS, 15, 0.00)              |
| HDL-C<br>(mmol/L)            | -0.29<br>(NS, 1, 0.00)                | -0.09<br>(NS, 1, 0.00)               | -0.09<br>(NS, 3, 0.00)                | -0.01<br>(NS, 3, 0.00)               | -0.08<br>(NS, 4, 0.00)                | -0.03<br>(NS, 4, 0.00)               | -0.008<br>(NS, 19, 15.8)              | -0.03<br>(NS, 18, 0.00)              |
| TAGs<br>(mmol/L)             | +0.36<br>(NS, 1, 0.00)                | +0.29<br>(NS, 1, 0.00)               | +0.07<br>(NS, 3, 0.00)                | +0.06<br>(NS, 3, 0.00)               | +0.10<br>(NS, 6, 0.00)                | +0.06<br>(NS, 6, 0.00)               | +0.11<br>(NS, 14, 0.00)               | +0.15<br>(NS, 13, 0.00)              |
| SBP<br>(mm Hg)               | -                                     | -                                    | +0.11<br>(NS, 4, 61.6)                | -1.40<br>(NS, 1, 0.00)               | -0.18<br>(NS, 9, 26.4)                | -2.47<br>(NS, 9, 19.1)               | -0.15<br>(NS, 21, 0.00)               | -0.40<br>(NS, 19, 0.00)              |
| DBP<br>(mm Hg)               | -                                     | -                                    | +0.02<br>(NS, 2, 0.00)                | -0.95<br>(NS, 1, 0.00)               | -0.19<br>(0.092, 8, 7.4)              | -1.81<br>(0.087, 8, 8.4)             | -0.19<br>(0.017, 24, 0.00)            | -1.70<br>(0.012, 22, 0.00)           |
| FMD<br>(%)                   | -                                     | -                                    | -                                     | -                                    | -                                     | -                                    | -0.24<br>(NS, 10, 69.6)               | -0.20<br>(NS, 9, 69.6)               |
| Glucose<br>(mmol/L)          | -0.02<br>(NS, 1, 0.00)                | -0.19<br>(NS, 1, 0.00)               | +0.08<br>(NS, 1, 0.00)                | +0.20<br>(NS, 1, 0.00)               | +0.14<br>(NS, 3, 61.9)                | +0.03<br>(NS, 3, 58.9)               | -0.21<br>(NS, 11, 42.5)               | -0.12<br>(NS, 8, 0.00)               |
| Insulin<br>(mIU/L)           | -0.04<br>(NS, 4, 76.1)                | -0.01<br>(NS, 2, 0.00)               | -0.16<br>(NS, 2, 63.7)                | +0.26<br>(NS, 1, 0.00)               | +0.06<br>(NS, 3, 84.1)                | +0.56<br>(NS, 1, 0.00)               | -0.16<br>(NS, 2, 63.7)                | +0.26<br>(NS, 1, 0.00)               |
| Hb1Ac                        | -                                     | -                                    | -                                     | -                                    | -                                     | -                                    | +0.16<br>(NS, 3, 0.00)                | +0.11<br>(NS, 2, 0.00)               |
| HOMA-IR                      | +0.47<br>(0.041, 1, 0.00)             | +1.16<br>(0.038, 1, 0.00)            | -                                     | -                                    | +0.17<br>(NS, 1, 0.00)                | +0.18<br>(NS, 1, 0.00)               | -0.38<br>(NS, 2, 43.3)                | -0.12<br>(NS, 1, 0.00)               |

BMI: Body Mass Index; WC: Waist Circumference; T-C: Total Cholesterol; LDL-C: Low density Lipoprotein Cholesterol; HDL-C: High Density Lipoprotein Cholesterol; TAGs: Triacylglycerols; SBP: Systolic Blood Pressure; DBP: Diastolic Blood Pressure; FMD: Flow Mediated Dilation; Hb1Ac: Glycated Haemoglobin; HOMA-IR: Homeostatic Model Assessment of Insulin Resistance; SDM: standardized difference in means; DM: Difference in means; n: total number of studies included in the analysis; *I*<sup>2</sup>: heterogeneity index; Q-value: between-categories Q statistic. \*: Units refer to the size effect estimation (DM); S: Significance of the analysis; NS: not significant, *P*-values < 0.05 were significant and indicated. *P*-values: 0.05 ≤ *P*-value < 0.1 were considered marginally significant and are also indicated.
