# Supplementary material for: Meta-Analysis of the Effects of Foods and Derived Products Containing Ellagitannins and Anthocyanins on Cardiometabolic Biomarkers: Analysis of Factors Influencing Variability of the Individual Responses
Source: MDPI journal article supplement (doi:10.3390/ijms19030694), 2018-02-28
Supplement: s1 [file s1]

**Supplementary Table S3.** Overall effect size estimations (DM) of the impact of ellagitannins and (or) anthocyanins containing foods and products on a range of cardiovascular risk associated biomarkers.

|                             | n   | N <sub>T</sub> | N <sub>S</sub> | N <sub>C</sub> | DM     | 95% CI            | Z      | P-value | Tau <sup>2</sup> | Q     | df<br>(P-value) | I <sup>2</sup><br>(%) | Egger's regression |                       |
|-----------------------------|-----|----------------|----------------|----------------|--------|-------------------|--------|---------|------------------|-------|-----------------|-----------------------|--------------------|-----------------------|
|                             |     |                |                |                |        |                   |        |         |                  |       |                 |                       | Intercept          | P-value<br>(2-tailed) |
| BMI<br>(Kg/m <sup>2</sup> ) | 47  | 2145           | 1095           | 1050           | -0.003 | -0.014,<br>0.007  | -0.592 | NS      | 0.000            | 11.7  | 46<br>(1.000)   | 0.00                  | -0.031             | NS                    |
| WC<br>(cm)                  | 22  | 972            | 503            | 469            | -1.219 | -2.073,<br>-0.365 | -2.799 | 0.005   | 0.828            | 33.6  | 21<br>(0.040)   | 37.5                  | 0.152              | NS                    |
| T-C<br>(mmol/L)             | 103 | 3673           | 1902           | 1771           | -0.099 | -0.177,<br>-0.020 | -2.417 | 0.013   | 0.078            | 349.4 | 102<br>(0.000)  | 70.6                  | 0.017              | NS                    |
| LDL-C<br>(mmol/L)           | 92  | 3307           | 1718           | 1589           | -0.032 | -0.117,<br>0.052  | -0.748 | NS      | 91.0             | 523.8 | 91<br>(0.000)   | 82.6                  | 0.256              | NS                    |
| HDL-C<br>(mmol/L)           | 92  | 3239           | 1692           | 1547           | 0.026  | -0.001,<br>0.053  | 1.867  | 0.062   | 0.008            | 237.2 | 91<br>(0.000)   | 61.6                  | -0.412             | NS                    |
| TAGs<br>(mmol/L)            | 88  | 2929           | 1525           | 1404           | -0.006 | -0.071,<br>0.059  | -0.177 | 0.086   | 0.045            | 360.4 | 87<br>(0.000)   | 75.9                  | 0.312              | NS                    |
| SBP<br>(mm Hg)              | 83  | 3175           | 1630           | 1545           | -1.561 | -2.129,<br>-0.994 | -5.394 | 0.000   | 0.000            | 69.0  | 82<br>(0.846)   | 0.00                  | -0.214             | NS                    |
| DBP<br>(mm Hg)              | 90  | 3437           | 1782           | 1655           | -1.417 | -2.079,<br>-0.756 | -4.198 | 0.000   | 2.301            | 152.4 | 89<br>(0.000)   | 41.6                  | -0.590             | 0.0005                |
| FMD<br>(%)                  | 21  | 547            | 270            | 277            | 0.635  | 0.073,<br>1.197   | 2.214  | 0.027   | 0.841            | 112.1 | 20<br>(0.000)   | 82.2                  | 0.831              | NS                    |
| Glucose<br>(mmol/L)         | 60  | 2210           | 1156           | 1054           | -0.033 | -0.093,<br>0.027  | -1.086 | NS      | 0.012            | 99.4  | 59<br>(0.001)   | 40.6                  | 0.147              | NS                    |
| Insulin<br>(mIU/L)          | 24  | 900            | 446            | 454            | -0.348 | -1.097,<br>0.401  | -0.911 | NS      | 0.869            | 45.6  | 23<br>(0.003)   | 49.6                  | 0.139              | NS                    |
| Hb1Ac                       | 19  | 705            | 374            | 331            | 0.047  | -0.143,<br>0.236  | 0.482  | NS      | 0.120            | 242.9 | 18<br>(0.000)   | 92.6                  | -1.307             | NS                    |
| HOMA-IR                     | 15  | 593            | 305            | 288            | -0.118 | -0.448,<br>0.212  | -0.702 | NS      | 0.182            | 28.7  | 14<br>(0.012)   | 51.2                  | 1.093              | NS                    |

BMI: Body Mass Index; WC: Waist Circumference; T-C: Total Cholesterol; LDL-C: Low density Lipoprotein Cholesterol; HDL-C: High Density Lipoprotein Cholesterol; TAGs: Triacylglycerols; SBP: Systolic Blood Pressure; DBP: Diastolic Blood Pressure; FMD: Flow Mediated Dilation; Hb1Ac: Glycated Haemoglobin; HOMA-IR: Homeostatic Model Assessment of Insulin Resistance; n: total number of studies included in the analysis; N<sub>T</sub>: number of total participants; N<sub>S</sub>: number of participants in the supplemented group; N<sub>C</sub>: number of participants in the control group; DM: difference in means; 95% CI: lower and upper confidence limits for the average DM; df: degrees of freedom; Z: statistic for testing the significance of the average DM; Tau<sup>2</sup>: between-studies variance; Q: heterogeneity statistic; I<sup>2</sup>: heterogeneity index. NS: not significant, P-values < 0.05 were significant and indicated. P-values: 0.05 ≤ P-value < 0.1 were considered marginally significant and are also indicated.
