# Supplementary material for: Meta-Analysis of the Effects of Foods and Derived Products Containing Ellagitannins and Anthocyanins on Cardiometabolic Biomarkers: Analysis of Factors Influencing Variability of the Individual Responses
Source: MDPI journal article supplement (doi:10.3390/ijms19030694), 2018-02-28
Supplement: s1 [file s1]

**Supplementary Table S2.** Overall effect estimations (SDM) of the impact of ellagitannins and (or) anthocyanins containing foods and products on a range of cardiovascular risk associated biomarkers.

|         | n   | N <sub>T</sub> | N <sub>S</sub> | N <sub>C</sub> | SDM    | 95% CI            | Z      | P-value | Tau <sup>2</sup> | Q     | df<br>(P-value) | I <sup>2</sup><br>(%) | Egger's regression |                       |
|---------|-----|----------------|----------------|----------------|--------|-------------------|--------|---------|------------------|-------|-----------------|-----------------------|--------------------|-----------------------|
|         |     |                |                |                |        |                   |        |         |                  |       |                 |                       | Intercept          | P-value<br>(2-tailed) |
| BMI     | 51  | 2343           | 1194           | 1149           | -0.042 | -0.123,<br>0.040  | -1.005 | NS      | 0.000            | 14.7  | 50<br>(1.000)   | 0.000                 | 0.203              | NS                    |
| WC      | 23  | 1026           | 528            | 498            | -0.296 | -0.515,<br>-0.078 | -2.659 | 0.008   | 0.167            | 60.1  | 22<br>(0.000)   | 63.4                  | -0.707             | NS                    |
| T-C     | 109 | 3991           | 2060           | 1931           | -0.173 | -0.272,<br>-0.074 | -3.421 | 0.001   | 0.139            | 237.4 | 108<br>(0.000)  | 54.5                  | 0.389              | NS                    |
| LDL-C   | 97  | 3492           | 1811           | 1681           | -0.099 | -0.220,<br>0.021  | -1.620 | NS      | 0.217            | 270.6 | 96<br>(0.000)   | 64.5                  | 2.637              | 0.000                 |
| HDL-C   | 99  | 3581           | 1858           | 1723           | 0.111  | 0.009,<br>0.214   | 2.124  | 0.034   | 0.133            | 208.9 | 98<br>(0.000)   | 53.1                  | -1.698             | 0.000                 |
| TAGs    | 97  | 3602           | 1859           | 1743           | -0.065 | -0.174,<br>0.043  | -1.182 | NS      | 0.157            | 227.7 | 96<br>(0.000)   | 57.8                  | 1.560              | 0.002                 |
| SBP     | 95  | 3539           | 1812           | 1717           | -0.204 | -0.284,<br>-0.124 | -5.013 | 0.000   | 0.037            | 125.3 | 94<br>(0.017)   | 25.0                  | 0.005              | NS                    |
| DBP     | 99  | 3790           | 1959           | 1831           | -0.185 | -0.264,<br>-0.106 | -4.600 | 0.000   | 0.042            | 135.8 | 98<br>(0.007)   | 27.9                  | -0.579             | NS                    |
| FMD     | 22  | 563            | 278            | 285            | 0.204  | -0.166,<br>0.574  | 1.080  | NS      | 0.520            | 80.1  | 21<br>(0.000)   | 73.8                  | -2.820             | 0.004                 |
| Glucose | 67  | 2369           | 1236           | 1133           | -0.101 | -0.219,<br>0.017  | -1.671 | 0.095   | 0.103            | 122.3 | 66<br>(0.000)   | 46.1                  | -0.427             | NS                    |
| Insulin | 34  | 1236           | 612            | 624            | -0.042 | -0.248,<br>0.164  | -0.402 | NS      | 0.229            | 97.3  | 33<br>(0.000)   | 66.1                  | 0.527              | NS                    |
| Hb1Ac   | 20  | 732            | 387            | 345            | 0.121  | -0.275,<br>0.517  | 0.600  | NS      | 0.668            | 120.6 | 19<br>(0.000)   | 82.2                  | 2.513              | NS                    |
| HOMA-IR | 18  | 840            | 428            | 412            | -0.172 | -0.411,<br>0.066  | -1.416 | NS      | 0.158            | 46.5  | 17<br>(0.000)   | 63.4                  | -1.892             | NS                    |

BMI: Body Mass Index; WC: Waist Circumference; T-C: Total Cholesterol; LDL-C: Low density Lipoprotein Cholesterol; HDL-C: High Density Lipoprotein Cholesterol; TAGs: Triacylglycerols; SBP: Systolic Blood Pressure; DBP: Diastolic Blood Pressure; FMD: Flow Mediated Dilation; Hb1Ac: Glycated Haemoglobin; HOMA-IR: Homeostatic Model Assessment of Insulin Resistance; n: total number of studies included in the analysis; N<sub>T</sub>: number of total participants; N<sub>S</sub>: number of participants in the supplemented group; N<sub>C</sub>: number of participants in the control group; SDM: standardized difference in means; 95% CI: lower and upper confidence limits for the average SDM; df: degrees of freedom; Z: statistic for testing the significance of the average SDM; Tau<sup>2</sup>: between-studies variance; Q: heterogeneity statistic; I<sup>2</sup>: heterogeneity index. NS: not significant, P-values < 0.05 were significant and indicated. P-values: 0.05 ≤ P-value < 0.1 were considered marginally significant and are also indicated.
