# Supplementary material for: Meta-Analysis of the Effects of Foods and Derived Products Containing Ellagitannins and Anthocyanins on Cardiometabolic Biomarkers: Analysis of Factors Influencing Variability of the Individual Responses
Source: MDPI journal article supplement (doi:10.3390/ijms19030694), 2018-02-28

**Supplementary Figure S40.** Overall effects of the ellagitannins and/or anthocyanins supplementation and the duration of the intervention (days) using random-effects meta-regression analysis on high density lipoprotein- cholesterol (HDL-C) (slope and 2-tailed *P*-value).

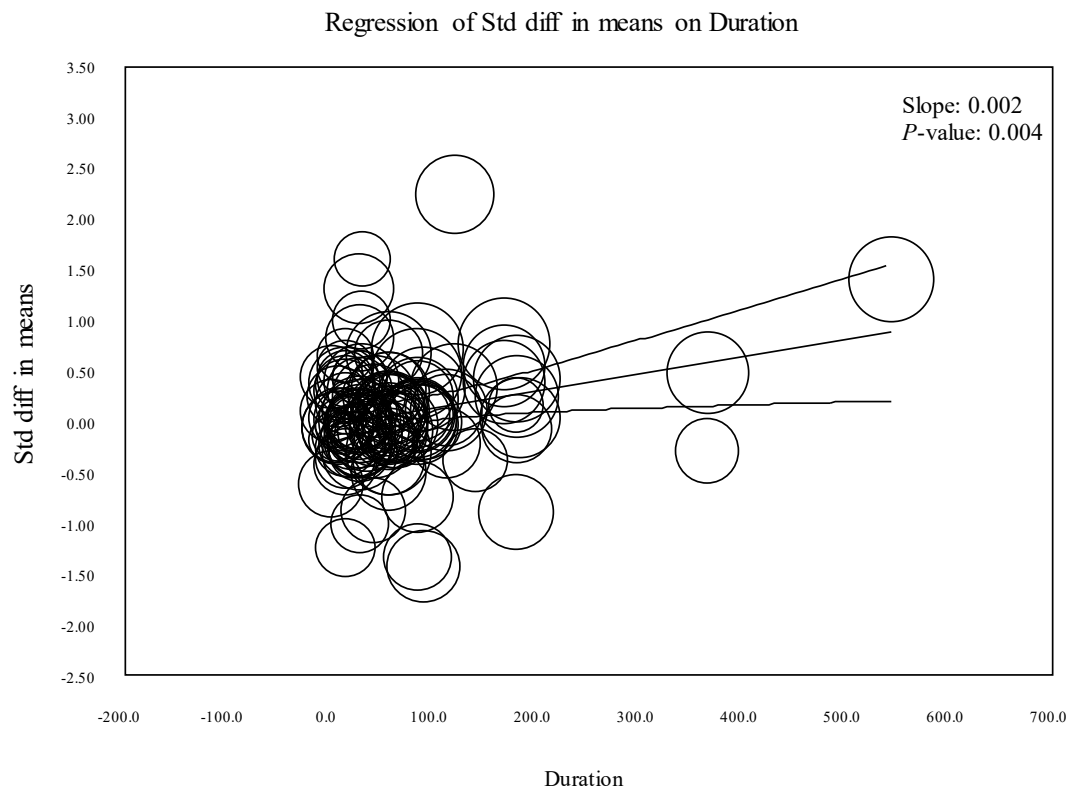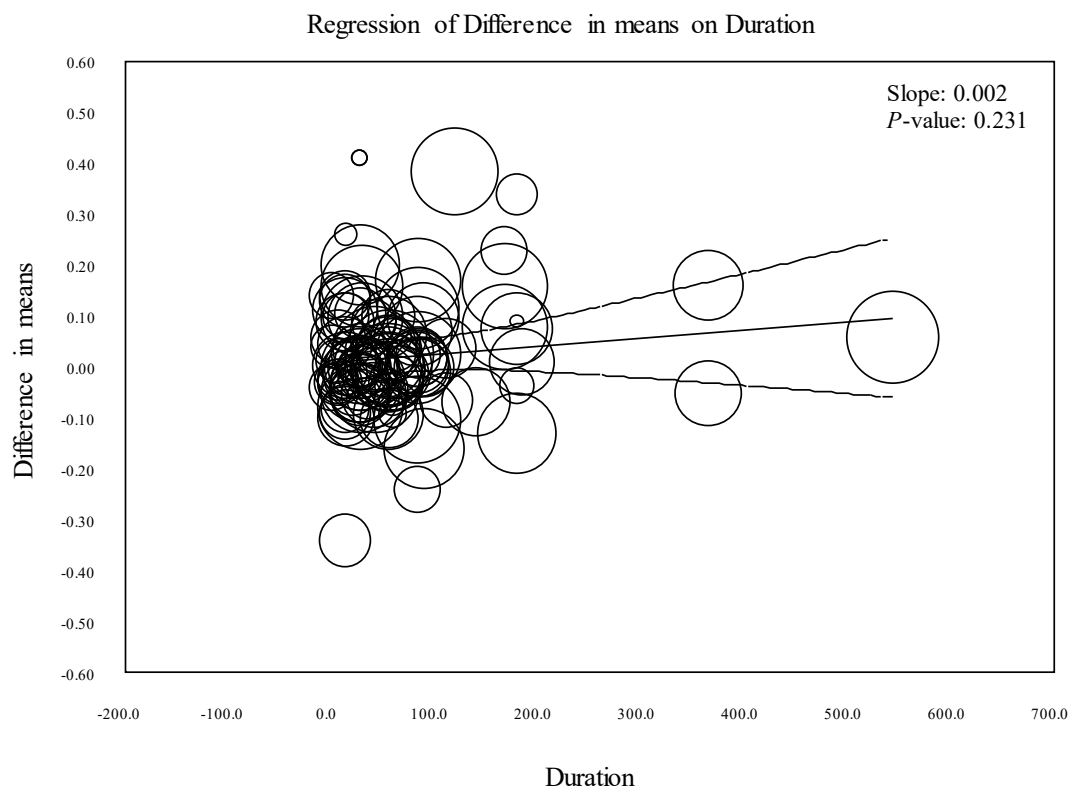

Supplement: s1 [file s1]
