# Supplementary material for: Meta-Analysis of the Effects of Foods and Derived Products Containing Ellagitannins and Anthocyanins on Cardiometabolic Biomarkers: Analysis of Factors Influencing Variability of the Individual Responses
Source: MDPI journal article supplement (doi:10.3390/ijms19030694), 2018-02-28
Supplement: s1 [file s1]

**Supplementary Table S4.** Effect estimations (SDM) and effect size estimations (DM) of the impact of ellagitannins (ETs: pomegranate, nuts) and of anthocyanins (ANCS: berries, red grapes, red wine) containing foods and products on a range of cardiovascular risk associated biomarkers.

|                           | SDM    | <i>P</i> -value | n  | <i>I</i> <sup>2</sup> | Q-value | <i>P</i> -value | DM     | <i>P</i> -value | n  | <i>I</i> <sup>2</sup> | Q-value | <i>P</i> -value |
|---------------------------|--------|-----------------|----|-----------------------|---------|-----------------|--------|-----------------|----|-----------------------|---------|-----------------|
| BMI (Kg/m <sup>2</sup> )* |        |                 |    |                       |         |                 |        |                 |    |                       |         |                 |
| ETs                       | -0.076 | NS              | 17 | 0.00                  | 0.358   | NS              | -0.003 | NS              | 14 | 0.00                  | 0.001   | NS              |
| ANCS                      | -0.023 | NS              | 34 | 0.00                  |         |                 | -0.006 | NS              | 33 | 0.00                  |         |                 |
| WC (cm)                   |        |                 |    |                       |         |                 |        |                 |    |                       |         |                 |
| ETs                       | -0.693 | 0.025           | 7  | 83.0                  | 6.696   | 0.010           | -1.527 | 0.031           | 6  | 75.9                  | 0.663   | NS              |
| ANCS                      | -0.118 | NS              | 16 | 0.00                  |         |                 | -0.749 | NS              | 16 | 0.00                  |         |                 |
| T-C (mmol/L)              |        |                 |    |                       |         |                 |        |                 |    |                       |         |                 |
| ETs                       | -0.184 | 0.006           | 28 | 18.1                  | 0.005   | NS              | -0.087 | 0.000           | 26 | 0.00                  | 0.131   | NS              |
| ANCS                      | -0.172 | 0.008           | 81 | 60.9                  |         |                 | -0.102 | 0.094           | 77 | 76.6                  |         |                 |
| LDL-C (mmol/L)            |        |                 |    |                       |         |                 |        |                 |    |                       |         |                 |
| ETs                       | -0.188 | 0.031           | 26 | 46.9                  | 0.700   | NS              | -0.107 | 0.000           | 24 | 0.00                  | 0.062   | NS              |
| ANCS                      | 0.054  | NS              | 71 | 68.7                  |         |                 | -0.029 | NS              | 68 | 85.7                  |         |                 |
| HDL-C (mmol/L)            |        |                 |    |                       |         |                 |        |                 |    |                       |         |                 |
| ETs                       | 0.104  | NS              | 23 | 24.9                  | 0.111   | NS              | 0.026  | 0.066           | 21 | 0.00                  | 0.191   | NS              |
| ANCS                      | 0.117  | 0.073           | 76 | 58.0                  |         |                 | 0.027  | NS              | 71 | 68.5                  |         |                 |
| TAGs (mmol/L)             |        |                 |    |                       |         |                 |        |                 |    |                       |         |                 |
| ETs                       | -0.235 | 0.025           | 26 | 63.0                  | 4.061   | 0.044           | -0.106 | 0.000           | 24 | 0.00                  | 1.443   | NS              |
| ANCS                      | 0.004  | NS              | 71 | 54.2                  |         |                 | 0.016  | NS              | 64 | 75.6                  |         |                 |
| SBP (mm Hg)               |        |                 |    |                       |         |                 |        |                 |    |                       |         |                 |
| ETs                       | -0.114 | NS              | 21 | 51.1                  | 1.191   | NS              | -1.855 | NS              | 15 | 38.1                  | 2.854   | 0.091           |
| ANCS                      | -0.228 | 0.000           | 74 | 12.4                  |         |                 | -2.188 | 0.000           | 68 | 0.00                  |         |                 |
| DBP (mm Hg)               |        |                 |    |                       |         |                 |        |                 |    |                       |         |                 |
| ETs                       | -0.141 | NS              | 20 | 38.0                  | 0.410   | NS              | -1.282 | NS              | 18 | 46.2                  | 0.962   | NS              |
| ANCS                      | -0.199 | 0.000           | 79 | 25.2                  |         |                 | -1.580 | 0.000           | 72 | 9.3                   |         |                 |
| FMD (%)                   |        |                 |    |                       |         |                 |        |                 |    |                       |         |                 |
| ETs                       | 0.619  | 0.014           | 3  | 0.00                  | 0.836   | NS              | 0.388  | NS              | 3  | 40.8                  | 0.011   | NS              |
| ANCS                      | 0.123  | NS              | 19 | 77.4                  |         |                 | 0.530  | NS              | 18 | 81.4                  |         |                 |
| Glucose (mmol/L)          |        |                 |    |                       |         |                 |        |                 |    |                       |         |                 |
| ETs                       | -0.241 | 0.052           | 16 | 52.0                  | 1.922   | NS              | -0.121 | 0.010           | 15 | 14.2                  | 3.100   | 0.078           |
| ANCS                      | -0.051 | NS              | 51 | 42.7                  |         |                 | 0.001  | NS              | 45 | 39.6                  |         |                 |
| Insulin (mIU/L)           |        |                 |    |                       |         |                 |        |                 |    |                       |         |                 |
| ETs                       | -0.128 | NS              | 12 | 48.5                  | 0.320   | NS              | -0.214 | NS              | 10 | 45.8                  | 0.003   | NS              |
| ANCS                      | 0.006  | NS              | 22 | 72.1                  |         |                 | -0.364 | NS              | 14 | 55.2                  |         |                 |
| Hb1Ac                     |        |                 |    |                       |         |                 |        |                 |    |                       |         |                 |
| ETs                       | 0.105  | NS              | 6  | 24.5                  | 0.060   | NS              | 0.071  | NS              | 6  | 9.10                  | 0.001   | NS              |
| ANCS                      | 0.127  | NS              | 14 | 88.6                  |         |                 | 0.040  | NS              | 13 | 94.9                  |         |                 |
| HOMA-IR                   |        |                 |    |                       |         |                 |        |                 |    |                       |         |                 |
| ETs                       | -0.114 | NS              | 7  | 66.8                  | 0.149   | NS              | -0.077 | NS              | 7  | 56.8                  | 0.017   | NS              |
| ANCS                      | -0.208 | NS              | 11 | 64.3                  |         |                 | -0.148 | NS              | 8  | 50.9                  |         |                 |

BMI: Body Mass Index; WC: Waist Circumference; T-C: Total Cholesterol; LDL-C: Low density Lipoprotein Cholesterol; HDL-C: High Density Lipoprotein Cholesterol; TAGs: Triacylglycerols; SBP: Systolic Blood Pressure; DBP: Diastolic Blood Pressure; FMD: Flow Mediated Dilation; Hb1Ac: Glycated Haemoglobin; HOMA-IR: Homeostatic Model Assessment of Insulin Resistance; SDM: standardized difference in means; DM: Difference in means; n: total number of studies included in the analysis; *I*<sup>2</sup>: heterogeneity index; Q-value: between-categories Q statistic. \*: Units refer to the size effect estimation (DM); NS: not significant, *P*-values < 0.05 were significant and indicated. *P*-values: 0.05 ≤ *P*-value < 0.1 were considered marginally significant and are also indicated.
