# Supplementary material for: Meta-Analysis of the Effects of Foods and Derived Products Containing Ellagitannins and Anthocyanins on Cardiometabolic Biomarkers: Analysis of Factors Influencing Variability of the Individual Responses
Source: MDPI journal article supplement (doi:10.3390/ijms19030694), 2018-02-28
Supplement: s1 [file s1]

**Supplementary Table S11.** Stratification by the source of bioactive compounds: influence on the effects estimations (SDM) and effect size estimation (DM) of the impact of ETs containing pomegranate and nuts, and ANCs containing berries, and red grapes/wine on a range of cardiovascular risk associated biomarkers.

| Source                       | ETs                                   |                                      |                                       |                                      |                                                        | ANCs                                  |                                      |                                       |                                      |                                                        |
|------------------------------|---------------------------------------|--------------------------------------|---------------------------------------|--------------------------------------|--------------------------------------------------------|---------------------------------------|--------------------------------------|---------------------------------------|--------------------------------------|--------------------------------------------------------|
|                              | Pomegranate                           |                                      | Nuts                                  |                                      | Comparison<br>between<br>subgroups<br>(Q statistic, S) | Berries                               |                                      | Red Wine / Red grapes                 |                                      | Comparison<br>between<br>subgroups<br>(Q statistic, S) |
|                              | SDM<br>(S, n, <i>I</i> <sup>2</sup> ) | DM<br>(S, n, <i>I</i> <sup>2</sup> ) | SDM<br>(S, n, <i>I</i> <sup>2</sup> ) | DM<br>(S, n, <i>I</i> <sup>2</sup> ) |                                                        | SDM<br>(S, n, <i>I</i> <sup>2</sup> ) | DM<br>(S, n, <i>I</i> <sup>2</sup> ) | SDM<br>(S, n, <i>I</i> <sup>2</sup> ) | DM<br>(S, n, <i>I</i> <sup>2</sup> ) |                                                        |
| BMI<br>(Kg/m <sup>2</sup> )* | -0.18<br>(NS, 5, 0.00)                | -0.20<br>(NS, 4, 0.00)               | -0.04<br>(NS, 12, 0.00)               | -0.01<br>(NS, 10, 0.00)              | SDM: 0.82, NS<br>DM: 0.78, NS                          | -0.05<br>(NS, 16, 0.00)               | +0.03<br>(NS, 15, 0.00)              | -0.14<br>(NS, 15, 0.00)               | -0.05<br>(NS, 15, 0.00)              | SDM: 0.01, NS<br>DM: 0.01, NS                          |
| WC<br>(cm)                   | -0.20<br>(NS, 1, 0.00)                | -3.90<br>(NS, 1, 0.00)               | -0.78<br>(0.027, 6, 85.10)            | -1.51<br>(0.038, 5, 80.70)           | SDM: 0.40, NS<br>DM: 0.08, NS                          | -0.15<br>(0.088, 10, 5.43)            | -0.94<br>(NS, 10, 14.15)             | -0.02<br>(NS, 6, 0.00)                | -0.09<br>(NS, 6, 0.00)               | SDM: 0.56, NS<br>DM: 0.22, NS                          |
| T-C<br>(mmol/L)              | -0.04<br>(NS, 11, 0.00)               | -0.02<br>(NS, 11, 0.00)              | -0.32<br>(0.000, 17, 2.57)            | -0.098<br>(0.000, 15, 0.00)          | SDM: 10.83, 0.001<br>DM: 3.31, 0.069                   | -0.21<br>(0.021, 38, 67.59)           | -0.16<br>(0.093, 35, 81.53)          | -0.14<br>(NS, 44, 52.96)              | -0.06<br>(NS, 43, 67.94)             | SDM: 0.30, NS<br>DM: 0.70, NS                          |
| LDL-C<br>(mmol/L)            | -0.07<br>(NS, 10, 0.00)               | -0.05<br>(NS, 10, 0.00)              | -0.26<br>(0.047, 16, 62.28)           | -0.11<br>(0.000, 14, 0.00)           | SDM: 1.31, NS<br>DM: 0.66, NS                          | -0.05<br>(NS, 31, 74.63)              | -0.05<br>(NS, 30, 83.56)             | -0.06<br>(NS, 40, 62.56)              | -0.01<br>(NS, 38, 87.17)             | SDM: 0.07, NS<br>DM: 0.13, NS                          |
| HDL-C<br>(mmol/L)            | +0.11<br>(NS, 10, 0.00)               | +0.01<br>(NS, 10, 0.00)              | +0.14<br>(NS, 13, 44.66)              | +0.03<br>(0.029, 11, 0.00)           | SDM: 0.09, NS<br>DM: 0.30, NS                          | +0.17<br>(NS, 33, 74.13)              | +0.04<br>(NS, 30, 82.66)             | +0.05<br>(NS, 43, 5.60)               | +0.02<br>(NS, 41, 17.09)             | SDM: 1.06, 0.03<br>DM: 0.52, NS                        |
| TAGs<br>(mmol/L)             | -0.05<br>(NS, 10, 0.00)               | -0.01<br>(NS, 10, 0.00)              | -0.33<br>(0.031, 16, 71.93)           | -0.11<br>(0.000, 14, 0.00)           | SDM: 1.44, NS<br>DM: 1.10, NS                          | -0.10<br>(NS, 34, 62.44)              | -0.05<br>(NS, 28, 60.50)             | +0.13<br>(NS, 37, 34.63)              | +0.07<br>(NS, 36, 72.18)             | SDM: 3.83, 0.05<br>DM: 2.46, NS                        |
| SBP<br>(mm Hg)               | -0.09<br>(NS, 8, 59.78)               | -0.26<br>(NS, 6, 56.47)              | -0.13<br>(NS, 13, 48.51)              | -1.63<br>(NS, 9, 27.99)              | SDM: 0.03, NS<br>DM: 0.03, NS                          | -0.25<br>(0.000, 38, 37.16)           | -2.41<br>(0.000, 34, 0.00)           | -0.21<br>(0.000, 36, 0.00)            | -3.31<br>(0.014, 34, 0.00)           | SDM: 0.11, NS<br>DM: 0.35, NS                          |
| DBP<br>(mm Hg)               | -0.46<br>(0.000, 8, 0.00)             | -4.31<br>(0.000, 8, 0.00)            | +0.06<br>(NS, 12, 0.00)               | +0.58<br>(0.004, 10, 0.00)           | SDM: 12.95, 0.000<br>DM: 17.32, 0.000                  | -0.25<br>(0.001, 42, 48.42)           | -1.57<br>(0.002, 37, 38.28)          | -0.16<br>(0.000, 39, 26.88)           | -1.50<br>(0.002, 35, 0.00)           | SDM: 0.80, NS<br>DM: 0.06, NS                          |
| FMD<br>(%)                   | +0.71<br>(NS, 1, 0.00)                | +0.05<br>(NS, 1, 0.00)               | +0.58<br>(0.058, 2, 0.00)             | +1.04<br>(0.053, 2, 40.84)           | SDM: 0.07, NS<br>DM: 3.37, NS                          | +0.46<br>(NS, 9, 77.27)               | +1.39<br>(0.011, 8, 80.08)           | -0.19<br>(NS, 10, 58.02)              | -0.73<br>(NS, 10, 64.95)             | SDM: 2.89, NS<br>DM: 5.68, NS                          |
| Glucose<br>(mmol/L)          | -0.10<br>(NS, 7, 0.00)                | -0.09<br>(NS, 7, 0.00)               | -0.36<br>(0.079, 9, 67.48)            | -0.14<br>(0.061, 8, 42.92)           | SDM: 1.17, NS<br>DM: 0.10, NS                          | -0.05<br>(NS, 30, 51.12)              | -0.01<br>(NS, 26, 39.54)             | -0.04<br>(NS, 21, 27.67)              | +0.01<br>(NS, 19, 40.85)             | SDM: 0.00, NS<br>DM: 0.04, NS                          |
| Insulin<br>(mIU/L)           | +0.09<br>(NS, 3, 39.96)               | +1.17<br>(NS, 3, 41.19)              | -0.20<br>(NS, 9, 53.19)               | -0.39<br>(NS, 7, 53.60)              | SDM: 0.62, NS<br>DM: 0.25, NS                          | -0.01<br>(NS, 14, 59.16)              | -0.29<br>(0.082, 8, 4.07)            | -0.04<br>(NS, 8, 83.85)               | +1.05<br>(NS, 6, 75.14)              | SDM: 0.04, NS<br>DM: 0.03, NS                          |
| Hb1Ac                        | -0.17<br>(NS, 1, 0.00)                | -0.24<br>(NS, 1, 0.00)               | +0.17<br>(NS, 5, 30.72)               | +0.08<br>(NS, 5, 20.65)              | SDM: 0.62, NS<br>DM: 0.45, NS                          | -0.63<br>(0.044, 7, 82.51)            | -0.20<br>(0.040, 6, 69.89)           | +0.97<br>(0.038, 7, 88.49)            | +0.26<br>(0.026, 7, 78.75)           | SDM: 8.59, 0.003<br>DM: 9.41, 0.002                    |
| HOMA-IR                      | -0.42<br>(NS, 3, 87.63)               | -0.17<br>(NS, 3, 81.41)              | +0.04<br>(NS, 4, 0.00)                | +0.12<br>(NS, 4, 0.00)               | SDM: 0.56, NS<br>DM: 0.22, NS                          | -0.32<br>(0.098, 8, 73.43)            | -0.23<br>(NS, 5, 65.74)              | +0.09<br>(NS, 3, 0.00)                | +0.14<br>(NS, 3, 0.00)               | SDM: 1.25, NS<br>DM: 0.64, NS                          |

BMI: Body Mass Index; WC: Waist Circumference; T-C: Total Cholesterol; LDL-C: Low density Lipoprotein Cholesterol; HDL-C: High Density Lipoprotein Cholesterol; TAGs: Triacylglycerols; SBP: Systolic Blood Pressure; DBP: Diastolic Blood Pressure; FMD: Flow Mediated Dilation; Hb1Ac: Glycated Haemoglobin; HOMA-IR: Homeostatic Model Assessment of Insulin Resistance; SDM: standardized difference in means; DM: Difference in means; n: total number of studies included in the analysis; *I*<sup>2</sup>: heterogeneity index; Q-value: between-categories Q statistic. \*: Units refer to the size effect estimation (DM); S: Significance of the analysis; NS: not significant, *P*-values < 0.05 were significant and indicated. *P*-values: 0.05 ≤ *P*-value < 0.1 were considered marginally significant and are also indicated.
