# Supplementary material for: Meta-Analysis of the Effects of Foods and Derived Products Containing Ellagitannins and Anthocyanins on Cardiometabolic Biomarkers: Analysis of Factors Influencing Variability of the Individual Responses
Source: MDPI journal article supplement (doi:10.3390/ijms19030694), 2018-02-28
Supplement: s1 [file s1]

**Supplementary Table S10a.** Stratification by the country where the study was carried out (Asian countries *vs.* all other countries): influence on the effects estimations (SDM, DM) of the impact of ellagitannins (ETs: pomegranate, nuts) and of anthocyanins (ANCs: berries, red grapes, red wine) containing foods and products on a range of cardiovascular risk associated biomarkers.

| Country                      | ETs                                   |                                      |                                       |                                      | ANCs                                  |                                      |                                       |                                      |
|------------------------------|---------------------------------------|--------------------------------------|---------------------------------------|--------------------------------------|---------------------------------------|--------------------------------------|---------------------------------------|--------------------------------------|
|                              | East Asian countries                  |                                      | All other countries                   |                                      | East Asian countries                  |                                      | All other countries                   |                                      |
|                              | SDM<br>(S, n, <i>I</i> <sup>2</sup> ) | DM<br>(S, n, <i>I</i> <sup>2</sup> ) | SDM<br>(S, n, <i>I</i> <sup>2</sup> ) | DM<br>(S, n, <i>I</i> <sup>2</sup> ) | SDM<br>(S, n, <i>I</i> <sup>2</sup> ) | DM<br>(S, n, <i>I</i> <sup>2</sup> ) | SDM<br>(S, n, <i>I</i> <sup>2</sup> ) | DM<br>(S, n, <i>I</i> <sup>2</sup> ) |
| BMI<br>(Kg/m <sup>2</sup> )* | -0.08<br>(NS, 4, 15.87)               | -0.02<br>(NS, 4, 18.12)              | -0.07<br>(NS, 13, 0.00)               | +0.06<br>(NS, 10, 0.00)              | -0.05<br>(NS, 5, 0.00)                | -0.05<br>(NS, 5, 0.00)               | -0.01<br>(NS, 29, 0.00)               | -0.01<br>(NS, 28, 0.00)              |
| WC<br>(cm)                   | -0.48<br>(0.066, 1, 0.00)             | -0.62<br>(0.063, 1, 0.00)            | -0.73<br>(0.055, 6, 85.58)            | -2.38<br>(0.000, 5, 3.76)            | -0.10<br>(NS, 4, 0.00)                | -0.78<br>(NS, 4, 0.00)               | -0.14<br>(NS, 12, 0.00)               | -0.73<br>(NS, 12, 0.00)              |
| T-C<br>(mmol/L)              | -0.20<br>(NS, 4, 0.00)                | -0.19<br>(0.050, 4, 0.00)            | -0.17<br>(0.029, 24, 24.88)           | -0.08<br>(0.000, 22, 0.00)           | -0.45<br>(NS, 6, 0.00)                | -0.05<br>(NS, 6, 0.00)               | -0.18<br>(0.015, 75, 62.83)           | -0.11<br>(NS, 71, 78.11)             |
| LDL-C<br>(mmol/L)            | +0.07<br>(NS, 4, 0.00)                | -0.02<br>(NS, 4, 0.00)               | -0.23<br>(0.021, 22, 48.52)           | -0.11<br>(0.000, 20, 0.00)           | -0.45<br>(0.003, 6, 65.23)            | -0.30<br>(0.000, 6, 33.84)           | -0.01<br>(NS, 64, 66.77)              | 0.00<br>(NS, 61, 84.76)              |
| HDL-C<br>(mmol/L)            | -0.04<br>(NS, 2, 59.46)               | -0.01<br>(NS, 2, 60.50)              | +0.13<br>(NS, 21, 21.73)              | +0.03<br>(0.057, 19, 0.00)           | +0.57<br>(0.000, 6, 0.00)             | +0.15<br>(0.000, 6, 0.00)            | +0.07<br>(NS, 70, 54.03)              | +0.01<br>(NS, 65, 66.67)             |
| TAGs<br>(mmol/L)             | +0.12<br>(NS, 4, 29.59)               | +0.15<br>(NS, 4, 10.79)              | -0.32<br>(0.006, 22, 58.96)           | -0.11<br>(0.000, 20, 0.00)           | -0.11<br>(NS, 6, 0.00)                | -0.02<br>(NS, 3, 0.00)               | +0.03<br>(NS, 65, 57.75)              | +0.02<br>(NS, 61, 76.68)             |
| SBP<br>(mm Hg)               | -0.04<br>(NS, 1, 0.00)                | -0.43<br>(NS, 1, 0.00)               | -0.12<br>(NS, 20, 53.34)              | -2.12<br>(NS, 14, 42.33)             | -0.22<br>(0.004, 10, 0.00)            | -3.08<br>(0.008, 9, 0.00)            | -0.23<br>(0.000, 64, 19.15)           | -2.02<br>(0.000, 59, 0.00)           |
| DBP<br>(mm Hg)               | -                                     | -                                    | -0.14<br>(NS, 20, 38.05)              | -1.28<br>(NS, 16, 46.21)             | -0.08<br>(NS, 9, 0.00)                | -0.66<br>(NS, 9, 0.00)               | -0.22<br>(0.000, 69, 26.88)           | -1.66<br>(0.000, 62, 9.18)           |
| FMD<br>(%)                   | -                                     | -                                    | +0.62<br>(0.014, 3, 0.00)             | +0.39<br>(NS, 3, 40.84)              | +1.17<br>(0.000, 2, 35.93)            | +2.19<br>(0.000, 2, 64.06)           | -0.27<br>(NS, 3, 78.22)               | -0.86<br>(NS, 3, 80.08)              |
| Glucose<br>(mmol/L)          | +0.02<br>(NS, 2, 0.00)                | +0.03<br>(NS, 2, 0.00)               | -0.29<br>(0.041, 14, 53.82)           | -0.15<br>(0.007, 13, 16.55)          | +0.03<br>(NS, 4, 0.00)                | +0.09<br>(NS, 4, 0.00)               | -0.07<br>(NS, 47, 46.35)              | -0.01<br>(NS, 41, 44.10)             |
| Insulin<br>(mIU/L)           | -0.21<br>(NS, 2, 0.00)                | -1.38<br>(NS, 2, 0.00)               | -0.11<br>(NS, 10, 57.61)              | +0.01<br>(NS, 8, 57.13)              | +0.15<br>(NS, 3, 81.07)               | -4.55<br>(0.042, 1, 0.00)            | -0.02<br>(NS, 19, 72.16)              | -0.23<br>(NS, 13, 52.90)             |
| Hb1Ac                        | +0.35<br>(NS, 1, 0.00)                | +0.08<br>(NS, 1, 0.00)               | +0.03<br>(NS, 5, 25.26)               | +0.06<br>(NS, 5, 26.70)              | -0.02<br>(NS, 1, 0.00)                | -0.20<br>(NS, 1, 0.00)               | +0.15<br>(NS, 13, 89.44)              | +0.04<br>(NS, 12, 95.29)             |
| HOMA-IR                      | +0.25<br>(NS, 2, 46.82)               | +1.00<br>(0.054, 2, 0.00)            | -0.31<br>(NS, 5, 58.00)               | -0.29<br>(NS, 5, 50.15)              | -0.09<br>(NS, 3, 3.24)                | -0.46<br>(NS, 1, 0.00)               | -0.27<br>(NS, 8, 72.63)               | -0.12<br>(NS, 7, 57.80)              |

**Supplementary Table S10b.** Stratification by the country where the study was carried out (North America *vs.* all European countries): influence on the effects estimations (SDM, DM) of the impact of ellagitannins (ETs: pomegranate, nuts) and of anthocyanins (ANCs: berries, red grapes, red wine) containing foods and products on a range of cardiovascular risk associated biomarkers.

| Country               | ETs                |                   |                        |                   | ANCs               |                    |                        |                   |
|-----------------------|--------------------|-------------------|------------------------|-------------------|--------------------|--------------------|------------------------|-------------------|
|                       | North America      |                   | All European countries |                   | North America      |                    | All European countries |                   |
|                       | SDM<br>(S, n, P)   | DM<br>(S, n, P)   | SDM<br>(S, n, P)       | DM<br>(S, n, P)   | SDM<br>(S, n, P)   | DM<br>(S, n, P)    | SDM<br>(S, n, P)       | DM<br>(S, n, P)   |
| BMI                   | +0.04              | +0.27             | -0.19                  | -0.09             | +0.01              | +0.03              | -0.01                  | -0.01             |
| (Kg/m <sup>2</sup> )* | (NS, 5, 14.24)     | (NS, 5, 0.00)     | (NS, 4, 0.00)          | (NS, 1, 0.00)     | (NS, 11, 0.00)     | (NS, 11, 0.00)     | (NS, 16, 0.00)         | (NS, 16, 0.00)    |
| WC                    | -0.59              | -1.98             | -                      | -                 | -0.23              | -1.56              | +0.01                  | +0.14             |
| (cm)                  | (NS, 5, 85.60)     | (0.002, 4, 20.56) |                        |                   | (NS, 7, 26.64)     | (NS, 7, 38.25)     | (NS, 4, 0.00)          | (NS, 4, 0.00)     |
| T-C                   | -0.23              | -0.08             | -0.23                  | -0.14             | -0.20              | -0.13              | -0.18                  | -0.17             |
| (mmol/L)              | (NS, 11, 52.24)    | (0.000, 10, 0.00) | (NS, 6, 0.00)          | (0.079, 6, 0.00)  | (0.098, 24, 57.46) | (NS, 23, 77.81)    | (0.017, 33, 23.61)     | (0.000, 31, 4.92) |
| LDL-C                 | -0.30              | -0.11             | -0.23                  | -0.12             | +0.10              | +0.04              | -0.13                  | -0.07             |
| (mmol/L)              | (NS, 10, 70.09)    | (0.000, 9, 0.00)  | (NS, 4, 0.00)          | (0.069, 4, 0.00)  | (NS, 21, 61.22)    | (NS, 20, 74.28)    | (NS, 28, 25.07)        | (NS, 27, 26.98)   |
| HDL-C                 | +0.08              | -0.01             | +0.08                  | +0.02             | -0.05              | -0.03              | +0.06                  | +0.01             |
| (mmol/L)              | (NS, 10, 43.99)    | (NS, 9, 0.00)     | (NS, 4, 0.00)          | (NS, 4, 0.00)     | (NS, 23, 12.64)    | (0.036, 21, 0.00)  | (NS, 29, 38.94)        | (NS, 27, 23.14)   |
| TAGs                  | -0.39              | -0.11             | -0.83                  | -0.06             | -0.02              | -0.03              | -0.07                  | 0.00              |
| (mmol/L)              | (0.070, 11, 74.64) | (0.000, 10, 0.00) | (NS, 4, 0.00)          | (NS, 4, 0.00)     | (NS, 23, 56.34)    | (NS, 22, 18.69)    | (NS, 22, 41.08)        | (NS, 20, 45.60)   |
| SBP                   | 0.00               | +0.56             | -0.06                  | -2.40             | -0.36              | -2.97              | -0.19                  | -1.57             |
| (mm Hg)               | (NS, 7, 62.81)     | (NS, 6, 41.52)    | (NS, 7, 58.91)         | (NS, 3, 58.60)    | (0.002, 21, 54.97) | (0.001, 19, 14.43) | (0.007, 29, 0.00)      | (0.083, 27, 0.00) |
| DBP                   | -0.09              | -1.00             | -0.33                  | -5.21             | -0.36              | -2.23              | -0.18                  | -1.33             |
| (mm Hg)               | (NS, 7, 63.71)     | (NS, 6, 63.86)    | (0.097, 6, 26.57)      | (0.048, 5, 11.51) | (0.005, 21, 64.62) | (0.001, 20, 55.38) | (0.004, 36, 0.00)      | (0.014, 31, 0.00) |
| FMD                   | +0.56              | +1.04             | -                      | -                 | -0.13              | -0.65              | -0.06                  | -0.06             |
| (%)                   | (0.058, 2, 0.00)   | (0.053, 2, 0.00)  |                        |                   | (NS, 1, 0.00)      | (NS, 1, 0.00)      | (NS, 9, 75.81)         | (NS, 8, 75.81)    |
| Glucose               | -0.15              | -0.13             | -0.66                  | -0.11             | -0.12              | -0.02              | -0.12                  | -0.11             |
| (mmol/L)              | (NS, 8, 33.13)     | (NS, 7, 40.93)    | (NS, 3, 83.00)         | (0.000, 3, 0.00)  | (NS, 15, 48.47)    | (NS, 13, 22.74)    | (NS, 16, 48.47)        | (NS, 12, 46.88)   |
| Insulin               | -0.38              | -1.28             | +0.50                  | 3.04              | +0.21              | +0.59              | -0.75                  | -0.87             |
| (mIU/L)               | (0.065, 6, 47.63)  | (NS, 4, 34.76)    | (NS, 2, 71.35)         | (0.027, 2, 0.00)  | (0.086, 10, 8.58)  | (NS, 7, 0.00)      | (0.050, 5, 84.85)      | (NS, 4, 81.40)    |
| Hb1Ac                 | -0.11              | -0.04             | -                      | -                 | -0.63              | -0.09              | +1.48                  | +0.50             |
|                       | (NS, 4, 0.00)      | (NS, 4, 0.00)     |                        |                   | (NS, 4, 91.41)     | (NS, 4, 80.35)     | (0.099, 4, 93.76)      | (0.000, 3, 0.00)  |
| HOMA-IR               | +0.20              | +0.37             | -0.47                  | -0.37             | -0.33              | -0.16              | -0.76                  | -                 |
|                       | (NS, 2, 0.00)      | (NS, 2, 0.00)     | (NS, 1, 0.00)          | (NS, 1, 0.00)     | (NS, 5, 82.17)     | (NS, 5, 67.86)     | (0.056, 1, 0.00)       |                   |

**Supplementary Table S10c.** Stratification by the country where the study was carried out (Mediterranean countries *vs.* Non-Mediterranean countries): influence on the effects estimations (SDM, DM) of the impact of ellagitannins (ETs: pomegranate, nuts) and of anthocyanins (ANCs: berries, red grapes, red wine) containing foods and products on a range of cardiovascular risk associated biomarkers.

| Country                      | ETs                      |                         |                             |                            | ANCs                        |                             |                             |                             |
|------------------------------|--------------------------|-------------------------|-----------------------------|----------------------------|-----------------------------|-----------------------------|-----------------------------|-----------------------------|
|                              | Mediterranean countries  |                         | Non-Mediterranean countries |                            | Mediterranean countries     |                             | Non-Mediterranean countries |                             |
|                              | SDM<br>(S, n, <i>P</i> ) | DM<br>(S, n, <i>P</i> ) | SDM<br>(S, n, <i>P</i> )    | DM<br>(S, n, <i>P</i> )    | SDM<br>(S, n, <i>P</i> )    | DM<br>(S, n, <i>P</i> )     | SDM<br>(S, n, <i>P</i> )    | DM<br>(S, n, <i>P</i> )     |
| BMI<br>(Kg/m <sup>2</sup> )* | -0.26<br>(NS, 1, 0.00)   | -                       | -0.16<br>(NS, 3, 0.00)      | -0.09<br>(NS, 1, 0.00)     | 0.00<br>(NS, 12, 0.00)      | -0.01<br>(NS, 12, 0.00)     | -0.02<br>(NS, 4, 0.00)      | -0.11<br>(NS, 4, 0.00)      |
| WC<br>(cm)                   | -                        | -                       | -                           | -                          | +0.01<br>(NS, 4, 0.00)      | +0.14<br>(NS, 4, 0.00)      | -                           | -                           |
| T-C<br>(mmol/L)              | -0.07<br>(NS, 2, 0.00)   | -0.07<br>(NS, 2, 0.00)  | -0.29<br>(0.085, 4, 0.00)   | -0.15<br>(0.079, 4, 0.00)  | -0.24<br>(NS, 15, 51.26)    | -0.20<br>(0.030, 15, 22.26) | -0.13<br>(NS, 18, 0.00)     | -0.10<br>(0.088, 16, 0.00)  |
| LDL-C<br>(mmol/L)            | +0.11<br>(NS, 1, 0.00)   | +0.09<br>(NS, 1, 0.00)  | -0.33<br>(NS, 3, 0.00)      | -0.13<br>(0.054, 3, 0.00)  | -0.35<br>(0.002, 14, 13.18) | -0.19<br>(0.003, 14, 16.55) | +0.09<br>(NS, 14, 0.00)     | +0.07<br>(NS, 13, 0.00)     |
| HDL-C<br>(mmol/L)            | -0.14<br>(NS, 1, 0.00)   | -0.06<br>(NS, 1, 0.00)  | +0.14<br>(NS, 3, 0.00)      | +0.02<br>(NS, 3, 0.00)     | -0.01<br>(NS, 14, 0.00)     | +0.01<br>(NS, 14, 0.00)     | +0.14<br>(NS, 15, 66.09)    | +0.01<br>(NS, 13, 60.13)    |
| TAGs<br>(mmol/L)             | +0.04<br>(NS, 1, 0.00)   | +0.03<br>(NS, 1, 0.00)  | -0.12<br>(NS, 3, 0.00)      | -0.07<br>(NS, 3, 0.00)     | -0.13<br>(NS, 14, 46.53)    | -0.08<br>(NS, 14, 56.28)    | +0.02<br>(NS, 8, 33.33)     | +0.10<br>(NS, 6, 0.00)      |
| SBP<br>(mm Hg)               | +0.04<br>(NS, 5, 68.16)  | -1.89<br>(NS, 2, 77.04) | -0.31<br>(NS, 2, 0.00)      | -5.30<br>(NS, 1, 0.00)     | -0.20<br>(0.072, 14, 0.00)  | -2.34<br>(NS, 13, 0.00)     | -0.19<br>(0.025, 18, 0.00)  | -1.48<br>(NS, 17, 0.00)     |
| DBP<br>(mm Hg)               | -0.18<br>(NS, 2, 0.00)   | -2.13<br>(NS, 2, 0.00)  | -0.44<br>(NS, 4, 54.18)     | -7.93<br>(0.084, 3, 58.05) | -0.19<br>(0.054, 13, 0.00)  | -1.86<br>(0.019, 12, 0.00)  | -0.17<br>(0.028, 23, 0.00)  | -0.87<br>(NS, 19, 0.00)     |
| FMD<br>(%)                   | -                        | -                       | -                           | -                          | -0.67<br>(NS, 5, 79.16)     | -0.54<br>(NS, 4, 71.16)     | +0.54<br>(0.006, 13, 54.55) | +1.21<br>(0.002, 13, 61.87) |
| Glucose<br>(mmol/L)          | +0.11<br>(NS, 2, 0.00)   | +0.14<br>(NS, 2, 0.00)  | -1.03<br>(0.097, 2, 81.81)  | -0.11<br>(0.000, 2, 0.00)  | -0.44<br>(NS, 7, 76.46)     | -0.71<br>(0.092, 3, 85.38)  | +0.02<br>(NS, 9, 0.00)      | -0.01<br>(NS, 9, 0.00)      |
| Insulin<br>(mIU/L)           | -0.04<br>(NS, 1, 0.00)   | +0.90<br>(NS, 1, 0.00)  | +0.50<br>(NS, 2, 71.35)     | +3.04<br>(0.027, 2, 0.00)  | -2.30<br>(0.000, 1, 0.00)   | -3.80<br>(0.000, 1, 0.00)   | -0.40<br>(NS, 4, 69.96)     | -0.20<br>(NS, 3, 33.41)     |
| Hb1Ac                        | -                        | -                       | -                           | -                          | +2.06<br>(NS, 3, 94.64)     | +0.50<br>(0.000, 3, 0.00)   | -0.13<br>(NS, 1, 0.00)      | -                           |
| HOMA-IR                      | -                        | -                       | -0.47<br>(NS, 1, 0.00)      | -0.37<br>(NS, 1, 0.00)     | -                           | -                           | -0.76<br>(0.056, 1, 0.00)   | -                           |

BMI: Body Mass Index; WC: Waist Circumference; T-C: Total Cholesterol; LDL-C: Low density Lipoprotein Cholesterol; HDL-C: High Density Lipoprotein Cholesterol; TAGs: Triacylglycerols; SBP: Systolic Blood Pressure; DBP: Diastolic Blood Pressure; FMD: Flow Mediated Dilation; Hb1Ac: Glycated Haemoglobin; HOMA-IR: Homeostatic Model Assessment of Insulin Resistance; SDM: standardized difference in means; DM: Difference in means; n: total number of studies included in the analysis; *P*: heterogeneity index; Q-value: between-categories Q statistic. \*: Units refer to the size effect estimation (DM); S: Significance of the analysis; NS: not significant, *P*-values < 0.05 were significant and indicated. *P*-values:  $0.05 \leq P\text{-value} < 0.1$  were considered marginally significant and are also indicated.
