# Supplementary material for: Meta-Analysis of the Effects of Foods and Derived Products Containing Ellagitannins and Anthocyanins on Cardiometabolic Biomarkers: Analysis of Factors Influencing Variability of the Individual Responses
Source: MDPI journal article supplement (doi:10.3390/ijms19030694), 2018-02-28
Supplement: s1 [file s1]

**Supplementary Table S8.** Stratification by the background diet during supplementation: influence on the effects estimations (SDM, DM) of the impact of ellagitannins (ETs: pomegranate, nuts) and of anthocyanins (ANCs: berries, red grapes, red wine) containing foods and products on a range of cardiovascular risk associated biomarkers.

| Diet followed during supplementation | ETs                                   |                                      |                                       |                                      | ANCs                                  |                                      |                                       |                                      |
|--------------------------------------|---------------------------------------|--------------------------------------|---------------------------------------|--------------------------------------|---------------------------------------|--------------------------------------|---------------------------------------|--------------------------------------|
|                                      | Usual                                 |                                      | Controlled                            |                                      | Usual                                 |                                      | Controlled                            |                                      |
|                                      | SDM<br>(S, n, <i>I</i> <sup>2</sup> ) | DM<br>(S, n, <i>I</i> <sup>2</sup> ) | SDM<br>(S, n, <i>I</i> <sup>2</sup> ) | DM<br>(S, n, <i>I</i> <sup>2</sup> ) | SDM<br>(S, n, <i>I</i> <sup>2</sup> ) | DM<br>(S, n, <i>I</i> <sup>2</sup> ) | SDM<br>(S, n, <i>I</i> <sup>2</sup> ) | DM<br>(S, n, <i>I</i> <sup>2</sup> ) |
| BMI<br>(Kg/m <sup>2</sup> )*         | -0.01<br>(NS, 11, 0.00)               | -0.01<br>(NS, 11, 0.00)              | -0.27<br>(0.076, 4, 0.00)             | -0.70<br>(NS, 1, 0.00)               | -0.03<br>(NS, 21, 0.00)               | -0.02<br>(NS, 20, 0.00)              | -0.02<br>(NS, 12, 0.00)               | -0.01<br>(NS, 12, 0.00)              |
| WC<br>(cm)                           | -0.26<br>(NS, 4, 0.00)                | -0.60<br>(0.060, 3, 0.00)            | -1.89<br>(0.000, 3, 79.1)             | -2.63<br>(0.000, 2, 0.00)            | -0.15<br>(0.088, 10, 5.27)            | -1.27<br>(NS, 10, 8.21)              | -0.04<br>(NS, 4, 0.00)                | -0.15<br>(NS, 4, 0.00)               |
| T-C<br>(mmol/L)                      | -0.18<br>(0.028, 15, 0.00)            | -0.13<br>(0.026, 14, 0.00)           | -0.27<br>(0.057, 10, 44.32)           | -0.08<br>(0.000, 9, 0.00)            | -0.13<br>(0.096, 53, 55.11)           | -0.06<br>(NS, 51, 76.81)             | -0.32<br>(0.073 19, 79.38)            | -0.22<br>(NS, 19, 80.41)             |
| LDL-C (mmol/L)                       | -0.12<br>(NS, 13, 0.00)               | -0.06<br>(NS, 12, 0.00)              | -0.30<br>(NS, 10, 71.56)              | -0.11<br>(0.000, 9, 0.00)            | 0.06<br>(NS, 45, 75.23)               | 0.03<br>(NS, 44, 88.83)              | -0.31<br>(0.027, 17, 58.41)           | -0.22<br>(0.016, 16, 63.19)          |
| HDL-C (mmol/L)                       | +0.02<br>(NS, 11, 0.00)               | +0.01<br>(NS, 10, 0.00)              | +0.13<br>(NS, 9, 61.64)               | +0.04<br>(0.056, 8, 0.00)            | +0.10<br>(NS, 51, 56.37)              | +0.03<br>(NS, 48, 58.33)             | +0.18<br>(NS, 16, 73.13)              | +0.04<br>(NS, 16, 83.56)             |
| TAGs<br>(mmol/L)                     | -0.03<br>(NS, 13, 0.00)               | +0.01<br>(NS, 12, 0.00)              | -0.47<br>(0.000, 10, 76.15)           | -0.11<br>(0.000, 9, 0.00)            | 0.08<br>(NS, 45, 61.74)               | 0.04<br>(NS, 40, 80.39)              | -0.10<br>(NS, 17, 40.13)              | -0.04<br>(NS, 17, 46.76)             |
| SBP<br>(mm Hg)                       | -0.01<br>(NS, 11, 13.89)              | -0.34<br>(NS, 9, 4.99)               | -0.27<br>(NS, 6, 63.42)               | -3.20<br>(NS, 2, 56.16)              | -0.19<br>(0.000, 42, 0.00)            | -1.90<br>(0.001, 39, 0.00)           | -0.30<br>(0.002, 27, 36.02)           | -2.57<br>(0.003, 25, 0.00)           |
| DBP<br>(mm Hg)                       | -0.17<br>(NS, 11, 6.89)               | -1.62<br>(NS, 9, 38.90)              | +0.16<br>(NS, 4, 52.52)               | +0.75<br>(NS, 4, 11.51)              | -0.17<br>(0.002, 42, 18.13)           | -1.30<br>(0.001, 38, 15.22)          | -0.24<br>(0.024, 31, 32.59)           | -2.09<br>(0.000, 28, 0.00)           |
| FMD<br>(%)                           | +0.62<br>(0.014, 3, 0.00)             | +0.39<br>(NS, 3, 40.84)              | -                                     | -                                    | +0.44<br>(NS, 5, 83.06)               | +1.23<br>(0.084, 5, 69.65)           | +0.08<br>(NS, 13, 66.35)              | +0.55<br>(NS, 12, 62.56)             |
| Glucose<br>(mmol/L)                  | -0.06<br>(NS, 6, 0.00)                | -0.04<br>(NS, 5, 0.00)               | -0.38<br>(NS, 8, 67.16)               | -0.15<br>(0.038, 8, 30.32)           | -0.06<br>(NS, 31, 39.00)              | -0.01<br>(NS, 29, 53.56)             | -0.16<br>(NS, 14, 52.01)              | -0.02<br>(NS, 12, 0.00)              |
| Insulin<br>(mIU/L)                   | -0.29<br>(NS, 7, 57.58)               | -0.76<br>(NS, 5, 44.81)              | 0.00<br>(NS, 6, 22.84)                | +0.34<br>(NS, 5, 35.83)              | +0.25<br>(NS, 13, 66.29)              | +0.45<br>(NS, 6, 55.05)              | -0.61<br>(NS, 5, 85.96)               | -0.80<br>(NS, 5, 75.50)              |
| Hb1Ac                                | +0.13<br>(NS, 3, 0.00)                | +0.06<br>(NS, 3, 0.00)               | -0.15<br>(NS, 1, 0.00)                | -0.07<br>(NS, 1, 0.00)               | -0.21<br>(NS, 11, 81.41)              | -0.03<br>(NS, 11, 75.94)             | +2.56<br>(NS, 2, 97.75)               | +0.32<br>(NS, 2, 86.80)              |
| HOMA-IR                              | -0.04<br>(NS, 5, 75.75)               | 0.08<br>(NS, 5, 69.32)               | -0.47<br>(NS, 1, 0.00)                | -0.37<br>(NS, 1, 0.00)               | -0.23<br>(NS, 8, 66.60)               | -0.32<br>(NS, 6, 38.36)              | +0.07<br>(NS, 2, 73.40)               | -0.27<br>(NS, 2, 64.73)              |

BMI: Body Mass Index; WC: Waist Circumference; T-C: Total Cholesterol; LDL-C: Low density Lipoprotein Cholesterol; HDL-C: High Density Lipoprotein Cholesterol; TAGs: Triacylglycerols; SBP: Systolic Blood Pressure; DBP: Diastolic Blood Pressure; FMD: Flow Mediated Dilation; Hb1Ac: Glycated Haemoglobin; HOMA-IR: Homeostatic Model Assessment of Insulin Resistance; SDM: standardized difference in means; DM: Difference in means; n: total number of studies included in the analysis; *I*<sup>2</sup>: heterogeneity index; Q-value: between-categories Q statistic. \*: Units refer to the size effect estimation (DM); S: Significance of the analysis; NS: not significant, *P*-values < 0.05 were significant and indicated. *P*-values: 0.05 ≤ *P*-value < 0.1 were considered marginally significant and are also indicated.
