# Supplementary material for: Meta-Analysis of the Effects of Foods and Derived Products Containing Ellagitannins and Anthocyanins on Cardiometabolic Biomarkers: Analysis of Factors Influencing Variability of the Individual Responses
Source: MDPI journal article supplement (doi:10.3390/ijms19030694), 2018-02-28
Supplement: s1 [file s1]

**Table S1.** Characteristics of the randomized clinical trials included in this meta-analysis.

| First author, year (ref)         | N  | BMI (< 25 Kg/m <sup>2</sup> , >25 Kg/m <sup>2</sup> , mixed) | Age (range of years) | Gender (male, female, mixed) | Country where the study was conducted | Health status (healthy, disease, mixed)    | Menopausal status (pre-, post, mixed) | Smoking (non-smokers, smokers, mixed) | Medication (yes, no) | Background diet (usual, controlled) | Source description                   | Days of intervention | Risk of bias (score*) |
|----------------------------------|----|--------------------------------------------------------------|----------------------|------------------------------|---------------------------------------|--------------------------------------------|---------------------------------------|---------------------------------------|----------------------|-------------------------------------|--------------------------------------|----------------------|-----------------------|
| Abu-Amsha Caccetta, 2001 [35]    | 18 | Mixed                                                        | 25 - 71              | Male                         | Australia                             | Healthy                                    | NA                                    | Smokers                               | No                   | NR                                  | Red wine                             | 63                   | 5                     |
| Asgary, 2013 [36]                | 40 | <25                                                          | 9 - 16               | Mixed                        | Iran                                  | Hyper-lipidemia                            | No                                    | NR                                    | No                   | Controlled                          | Cornus mas                           | 42                   | 8                     |
| Asgary, 2014 [37]                | 21 | >25                                                          | 34 - 63              | Mixed                        | Iran                                  | Hyper-tension                              | NR                                    | Non-smokers                           | No                   | Usual                               | Pomegranate                          | 14                   | 6                     |
| Banini, 2006 [38]                | 52 | Mixed                                                        | 37 - 75              | Mixed                        | USA                                   | Diabetes                                   | NR                                    | NR                                    | NR                   | Usual                               | Juice and wine from muscadine grapes | 28                   | 3                     |
| Basu, 2014 [39]                  | 60 | >25                                                          | NR                   | Mixed                        | USA                                   | Healthy                                    | Mixed                                 | Non-smokers                           | No                   | Usual                               | Strawberry powder                    | 84                   | 6                     |
| Basu, 2011 [40]                  | 31 | >25                                                          | 44 - 60              | Mixed                        | USA                                   | Metabolic syndrome                         | NR                                    | NR                                    | No                   | Controlled                          | Cranberry juice                      | 56                   | 6                     |
| Basu, 2010 [41]                  | 48 | >25                                                          | 45 - 55              | Mixed                        | USA                                   | Metabolic syndrome                         | NR                                    | Non-smokers                           | No                   | Controlled                          | Blueberry                            | 56                   | 5.5                   |
| Basu, 2010 [42]                  | 27 | >25                                                          | NR                   | Mixed                        | USA                                   | Metabolic syndrome                         | NR                                    | Non-smokers                           | Yes                  | Usual                               | Strawberry                           | 56                   | 5                     |
| Bommannan Santhakumar, 2015 [43] | 13 | Mixed                                                        | NR                   | Mixed                        | Australia                             | Healthy                                    | NR                                    | Non-smokers                           | No                   | Usual                               | Plums                                | 28                   | 6                     |
| Botden, 2012 [44]                | 61 | NR                                                           | 30 - 65              | Male                         | Chile                                 | Metabolic syndrome                         | NA                                    | NR                                    | No                   | Usual                               | Red wine                             | 112                  | 6.5                   |
| Brennan, 2010 [45]               | 20 | >25                                                          | 40 - 75              | Mixed                        | Israel                                | Metabolic syndrome                         | NR                                    | NR                                    | Yes                  | Controlled                          | Walnuts                              | Acute study          | 5                     |
| Burton-Freeman, 2010 [46]        | 26 | >25                                                          | NR                   | Mixed                        | USA                                   | Hyperlipidemia                             | NR                                    | Non-smokers                           | No                   | Usual                               | Strawberry                           | 42                   | 5.5                   |
| Caldu, 1998 [47]                 | 18 | Mixed                                                        | 25 - 50              | Male                         | Spain                                 | Healthy                                    | NA                                    | Mixed                                 | No                   | Usual                               | Red wine                             | 14                   | 4                     |
| Castilla, 2008 [48]              | 32 | NR                                                           | 33 - 79              | Mixed                        | Spain                                 | Hemodialysis patients                      | NR                                    | NR                                    | No                   | Controlled                          | Red grapes                           | 14                   | 5                     |
| Castilla, 2006 [49]              | 38 | NR                                                           | 55 - 65              | Mixed                        | Spain                                 | Mixed (healthy and hemo-dyalysis patients) | NR                                    | NR                                    | Yes                  | Controlled                          | Red grape juice                      | 14                   | 5                     |

|                         |     |       |         |        |                 |                                    |       |             |     |            |                      |             |     |
|-------------------------|-----|-------|---------|--------|-----------------|------------------------------------|-------|-------------|-----|------------|----------------------|-------------|-----|
| Cerdá, 2006 [50]        | 30  | >25   | 50 - 70 | Male   | Spain           | Chronic obstructive pulmonary      | NA    | Mixed       | Yes | Controlled | Pomegranate juice    | 35          | 6   |
| Chiva-Blanch, 2012 [51] | 73  | >25   | 55 - 75 | Male   | Spain           | Hypertensive                       | NA    | Mixed       | Yes | Usual      | Red wine             | 28          | 7   |
| Clifton, 2004 [52]      | 36  | Mixed | 34 - 70 | Mixed  | Australia       | OW                                 | NR    | Mixed       | Yes | Usual      | Grape seed extract   | 28          | 7   |
| Cook, 2015 [53]         | 14  | Mixed | NR      | Male   | UK              | Healthy                            | NA    | NR          | NR  | Usual      | Blackcurrant extract | 7           | 3   |
| Cuevas, 2000 [54]       | 11  | <25   | 20 - 28 | Male   | Chile           | Healthy                            | NA    | Non-smokers | No  | Controlled | Red wine             | 60          | 4   |
| Curtis, 2009 [55]       | 57  | <25   | 52 - 64 | Female | UK              | Healthy                            | Post- | Non-smokers | No  | Usual      | Elderberry           | 84          | 9   |
| Davinelli, 2015 [56]    | 42  | >25   | 45 - 65 | Mixed  | Italy           | Healthy                            | NR    | Smokers     | No  | Usual      | Maqui                | 68          | 6   |
| Del Bo, 2014 [57]       | 16  | <25   | 20 - 30 | Male   | Italy           | Healthy                            | NA    | Smokers     | No  | Controlled | Blueberries          | 17          | 4   |
| Del Bo, 2013 [58]       | 10  | <25   | NR      | Male   | Italy           | Healthy                            | NA    | Non-Smokers | No  | Controlled | Blueberries          | 2           | 4.5 |
| Din, 2011 [59]          | 30  | <25   | NR      | Male   | UK              | Healthy                            | NA    | Mixed       | No  | Usual      | Walnuts              | 28          | 4   |
| Dohadwala, 2011 [60]    | 47  | >25   | NR      | Mixed  | USA             | Coronary artery disease            | NR    | Mixed       | Yes | Controlled | Cranberry            | 28          | 5.5 |
| Draijer, 2015 [61]      | 60  | NR    | NR      | Mixed  | The Netherlands | Mildly hypertensive                | NR    | Non-Smokers | No  | Usual      | Red grapes           | 28          | 4   |
| Duthie, 2006 [62]       | 20  | Mixed | 18 - 40 | Female | Scotland (UK)   | Healthy                            | Pre-  | Mixed       | No  | Usual      | Cranberry juice      | 14          | 5   |
| Edirisinghe, 2011 [63]  | 26  | >25   | NR      | Mixed  | United States   | Healthy                            | NR    | Non-smokers | No  | NR         | Strawberry           | Acute study | 5   |
| Ellis, 2011 [64]        | 26  | >25   | 40 - 75 | Mixed  | USA             | OW                                 | NR    | Non-smokers | No  | Usual      | Strawberry           | 24          | 4.5 |
| Erlund, 2008 [65]       | 71  | NR    | NR      | Mixed  | Finland         | Patients with CV risk factor       | NR    | Non-smokers | No  | Usual      | Berries              | 56          | 5   |
| Estruch, 2011 [66]      | 42  | NR    | 30 - 50 | Male   | Spain           | Healthy                            | NA    | Mixed       | No  | Controlled | Red wine             | 28          | 5   |
| Flammer, 2013 [67]      | 84  | Mixed | 40 - 60 | Mixed  | USA             | Peripheral endothelial dysfunction | NR    | Mixed       | Yes | NR         | Cranberry            | 120         | 6   |
| Foster, 2012 [68]       | 123 | >25   | 18 - 75 | Mixed  | USA             | OW                                 | NR    | NR          | No  | Controlled | Almond               | 182         | 4   |
| Fuhrman, 1995 [69]      | 17  | NR    | 25 - 45 | Male   | Israel          | Healthy                            | NA    | Non-smokers | No  | Usual      | Red wine             | 14          | 2   |
| Goldberg, 1996          | 24  | NR    | 26 - 45 | Male   | Canada          | Healthy                            | NA    | NR          | No  | Usual      | Red wine             | 28          | 3   |

|                       |    |       |         |        |                 |                          |       |             |     |            |                     |             |     |
|-----------------------|----|-------|---------|--------|-----------------|--------------------------|-------|-------------|-----|------------|---------------------|-------------|-----|
| [70]                  |    |       |         |        |                 |                          |       |             |     |            |                     |             |     |
| Gorinstein, 2006 [71] | 57 | NR    | 39 - 72 | NR     | Israel          | Coronary atherosclerosis | NR    | NR          | Yes | Usual      | Grapefruit          | 30          | 4.5 |
| Gulati, 2014 [72]     | 60 | Mixed | NR      | Mixed  | India           | Metabolic syndrome       | NR    | NR          | NR  | Controlled | Pistachio           | 168         | 3.5 |
| Guo, 2014 [73]        | 44 | >25   | 18 - 25 | Mixed  | China           | NAFLD                    | NR    | Non-smoker  | No  | Usual      | Bayberry juice      | 28          | 6.5 |
| Haddad, 2014 [74]     | 16 | Mixed | 23 - 44 | Mixed  | USA             | Healthy                  | NR    | Non-smokers | No  | Controlled | Walnut              | Acute study | 5   |
| Hansen, 2005 [75]     | 69 | Mixed | 38 - 74 | Mixed  | Denmark         | Healthy                  | Mixed | Mixed       | No  | Controlled | Red wine            | 28          | 6   |
| Hassellund 2013 [76]  | 31 | Mixed | 35 - 51 | Male   | Norway          | OW                       | NA    | Mixed       | Yes | Usual      | Bilberries          | 28          | 6.5 |
| Heber, 2007 [77]      | 64 | >25   | 35 - 65 | Mixed  | USA             | Healthy                  | NR    | Mixed       | No  | Controlled | Pomegranate         | 30          | 4   |
| Hijmering, 2007 [78]  | 20 | NR    | 24 - 45 | Mixed  | The Netherlands | Healthy                  | NR    | Non-smokers | No  | Usual      | Red wine            | Acute study | 5   |
| Hoggard, 2013 [79]    | 8  | >25   | NR      | Male   | UK              | Diabetes                 | NA    | NR          | No  | Controlled | Bilberry            | 16          | 6   |
| Hokayem, 2013 [80]    | 38 | Mixed | 30 - 65 | Mixed  | France          | Healthy                  | Mixed | NR          | No  | Controlled | Red grape powder    | 63          | 8   |
| Hollis, 2013 [81]     | 86 | >25   | 18 - 50 | Mixed  | USA             | Healthy                  | NR    | Non-smokers | No  | NR         | Concord grape juice | 84          | 4   |
| Hosseini, 2016 [82]   | 48 | >25   | 30 - 60 | Mixed  | Iran            | OW                       | NR    | NR          | NR  | Usual      | Pomegranate         | 30          | 8.5 |
| Huebbe, 2012 [83]     | 11 | >25   | NR      | Male   | Germany         | OW                       | NA    | Non-smokers | Yes | Usual      | Red grapes          | 7           | 4.5 |
| Jenkins, 2008 [84]    | 30 | Mixed | 38-75   | Mixed  | Canada          | Hyperlipidemia           | Post- | NR          | Yes | Controlled | Strawberry          | 30          | 3.5 |
| Jimenez, 2008 [85]    | 43 | Mixed | NR      | Mixed  | Spain           | Hypercholesterolemia     | NR    | Non-smokers | NR  | Usual      | Red grapes          | 112         | 2   |
| Jin, 2011 [86]        | 20 | Mixed | NR      | Mixed  | UK              | Healthy                  | NR    | NR          | No  | Controlled | Blackcurrant juice  | 2           | 5   |
| Johnson, 2015 [87]    | 48 | Mixed | NR      | Female | USA             | Stage I hypertension     | Post- | Mixed       | No  | Usual      | Blueberries         | 28          | 6   |
| Johnston, 2013 [88]   | 51 | >25   | 20 - 65 | Mixed  | USA             | Healthy                  | NR    | Non-smokers | No  | Controlled | Peanuts             | 56          | 4.5 |
| Karatzi, 2004 [89]    | 15 | >25   | NR      | Male   | Greece          | Coronary artery disease  | NA    | NR          | Yes | Controlled | Red grapes          | 15          | 8   |
| Karlsen, 2010 [90]    | 62 | >25   | 30 - 68 | Mixed  | Norway          | OW                       | Post- | Mixed       | No  | Usual      | Bilberry            | 30          | 6   |

|                           |    |       |         |        |             |                                |       |             |     |            |                                                          |             |     |
|---------------------------|----|-------|---------|--------|-------------|--------------------------------|-------|-------------|-----|------------|----------------------------------------------------------|-------------|-----|
| Katz, 2012 [91]           | 46 | >25   | NR      | Mixed  | USA         | OW                             | NR    | Non-smokers | Yes | Usual      | Walnuts                                                  | 56          | 6   |
| Kay, 2002 [92]            | 8  | <25   | 38 - 54 | Male   | Canada      | Healthy                        | NA    | Non-smokers | No  | Usual      | Blueberries                                              | Acute study | 2   |
| Khan, 2014 [93]           | 66 | Mixed | 53      | Mixed  | UK          | Healthy                        | NR    | Mixed       | No  | Controlled | Blackcurrant Juice                                       | 42          | 7   |
| Kianbakht, 2013 [94]      | 86 | >25   | 20 - 60 | Mixed  | Iran        | Disease                        | NR    | Non-Smokers | NR  | Usual      | Berries                                                  | 120         | 8   |
| Kolehmainen, 2015 [95]    | 27 | >25   | 43 - 57 | Mixed  | Finland     | OW                             | NR    | NR          | No  | Controlled | Bilberries                                               | 56          | 3.5 |
| Krikorian, 2012 [96]      | 21 | NR    | 68 - 90 | Mixed  | USA         | Mixed (healthy & hypertensive) | NR    | NR          | Yes | NR         | Concord grape                                            | 112         | 6   |
| Krikorian, 2010 [97]      | 9  | NR    | 71 - 81 | Mixed  | USA         | Age-related memory decline     | NR    | NR          | NR  | Usual      | Blueberry                                                | 84          | 4   |
| Lamport, 2016 [98]        | 25 | <25   | 40 - 50 | Female | UK          | Healthy                        | Pre-  | Non-smokers | NR  | NR         | Grapes                                                   | 84          | 6.5 |
| Lee, 2014 [99]            | 61 | Mixed | 35 - 65 | Mixed  | South Korea | Disease                        | NR    | NR          | Yes | Usual      | Mixed nuts (raw walnuts, raw pine nuts, roasted peanuts) | 42          | 5.5 |
| Lekakis, 2005 [100]       | 30 | Mixed | 50 - 55 | Mixed  | China       | Disease                        | NR    | NR          | Yes | Usual      | Blackcurrant                                             | 168         | 6   |
| Li, 2010 [101]            | 70 | >25   | 20 - 65 | Mixed  | USA         | Healthy                        | NR    | NR          | No  | Controlled | Pistachio                                                | 42          | 5.5 |
| López-Uriarte, 2010 [102] | 50 | >25   | NR      | Mixed  | Spain       | Metabolic syndrome             | NR    | NR          | Yes | Controlled | Nuts                                                     | 84          | 9   |
| Lynn, 2012 [103]          | 51 | Mixed | 30 - 50 | Mixed  | UK          | Healthy                        | NR    | Non-smokers | NR  | Usual      | Pomegranate                                              | 30          | 4.5 |
| Lynn, 2014 [104]          | 46 | Mixed | 30 - 50 | Mixed  | UK          | Healthy                        | NR    | Non-smokers | NR  | Usual      | Pomegranate                                              | 30          | 4.5 |
| Ma, 2010 [105]            | 24 | >25   | NR      | Mixed  | USA         | Diabetes                       | NR    | Non-smokers | Yes | Usual      | Walnuts                                                  | 140         | 5.5 |
| Mathew, 2012 [106]        | 19 | <25   | 18 - 34 | Male   | UK          | Healthy                        | NA    | Non-smokers | No  | Controlled | Pomegranate                                              | Acute study | 6   |
| McAnulty, 2014 [107]      | 20 | Mixed | 18 - 50 | Mixed  | USA         | OW                             | Post- | NR          | No  | Usual      | Blueberries                                              | 42          | 9   |
| McAnulty, 2005 [108]      | 25 | >25   | 18 - 35 | NR     | USA         | OW                             | NR    | Smokers     | NR  | Controlled | Blueberries                                              | 21          | 4   |
| McKay, 2010 [109]         | 65 | >25   | 30-70   | Mixed  | USA         | Metabolic syndrome             | Mixed | Non-smokers | No  | Usual      | Hibiscus tea                                             | 42          | 8   |
| Moazen, 2013 [110]        | 40 | Mixed | 35 - 60 | Mixed  | Iran        | Diabetes                       | NR    | Non-smokers | No  | Usual      | Strawberry drink                                         | 42          | 7.5 |

|                               |     |       |         |        |                 |                              |       |             |     |            |                           |             |     |
|-------------------------------|-----|-------|---------|--------|-----------------|------------------------------|-------|-------------|-----|------------|---------------------------|-------------|-----|
| Mukuddem-Petersen, 2007 [111] | 64  | >25   | 40 - 50 | Mixed  | South africa    | Metabolic syndrome           | NR    | Mixed       | Yes | Controlled | Walnuts                   | 56          | 5.5 |
| Naissides, 2004 [112]         | 17  | Mixed | 50 - 70 | Female | Australia       | Hyper-cholesterolemia        | Post- | Non-smokers | No  | Usual      | Red wine                  | 42          | 4   |
| Naissides, 2006 [113]         | 45  | Mixed | 50-70   | Female | Australia       | Disease                      | Post- | Non-smokers | No  | Usual      | Red wine                  | 42          | 4   |
| Natella, 2011 [114]           | 12  | NR    | 24-35   | Mixed  | Italy           | Healthy                      | NR    | NR          | No  | Usual      | Red wine                  | Acute study | 4   |
| Nigdikar, 1998 [115]          | 30  | NR    | 35 - 65 | Male   | UK              | Healthy                      | NA    | Non-smokers | NR  | Usual      | Red grapes                | 14          | 5   |
| Novotny, 2015 [116]           | 56  | Mixed | 25 - 65 | Mixed  | USA             | Healthy                      | NR    | Non-smokers | No  | Controlled | Cranberry juice           | 56          | 8   |
| Ohguro, 2012 [117]            | 40  | NR    | 55 - 69 | Mixed  | Japan           | Disease (eye)                | NR    | NR          | Yes | NR         | Blackcurrant              | 730         | 8   |
| Olmedilla-Alonso, 2008 [118]  | 25  | >25   | 46 - 62 | Mixed  | Spain           | OW                           | Post- | Mixed       | Yes | Usual      | Walnuts                   | 35          | 6   |
| Parham, 2015 [119]            | 48  | >25   | NR      | Mixed  | Iran            | Diabetes                     | NR    | NR          | NR  | NR         | Pistachio                 | 84          | 4   |
| Park, 2014 [120]              | 77  | >25   | 20 - 65 | Female | Korea           | Healthy                      | NR    | NR          | No  | Usual      | Pomegranate vinegar       | 56          | 7.5 |
| Park, 2004 [121]              | 40  | >25   | 41 - 48 | Male   | South Korea     | Healthy                      | NA    | Mixed       | NR  | Controlled | Concord grape juice       | 56          | 5   |
| Preuss, 2000 [122]            | 40  | NR    | NR      | NR     | USA             | Hyper-cholesterolemia        | NR    | NR          | NR  | NR         | Grape seed extract        | 56          | 5   |
| Puupponen-Pimiä, 2013 [123]   | 37  | >25   | NR      | Mixed  | Finland         | Metabolic syndrome           | NR    | NR          | Yes | Usual      | Blackcurrant and bilberry | 96          | 6,5 |
| Qin, 2009 [124]               | 120 | >25   | 40 - 65 | Mixed  | China           | Dyslipidemia                 | NR    | NR          | NR  | Usual      | Blackcurrant and bilberry | 84          | 7.5 |
| Queipo-OrtuNo, 2012 [125]     | 10  | >25   | 45 - 50 | Male   | Spain           | Healthy                      | No    | NR          | No  | Controlled | Red wine                  | 60          | 9   |
| Rahbar, 2015 [126]            | 100 | Mixed | 20 - 70 | Mixed  | Iran            | Hyper-cholesterolemia        | NR    | NR          | No  | Usual      | Grapes                    | 56          | 5   |
| Ras, 2013 [127]               | 70  | Mixed | 35 - 75 | Mixed  | The Netherlands | Healthy                      | Post- | NR          | No  | Controlled | Red grape seed            | 56          | 6.5 |
| Razavi, 2013 [128]            | 48  | NR    | 21-64   | Mixed  | Iran            | Hyperlipidemia               | NR    | Non-smokers | Yes | Usual      | Red grape seeds           | 56          | 8   |
| Riso, 2013 [129]              | 18  | Mixed | NR      | Male   | Italy           | Patients with CV risk factor | NA    | Mixed       | No  | Usual      | Blueberries               | 42          | 5.5 |

|                               |     |       |         |        |               |                                          |       |             |     |            |                         |             |     |
|-------------------------------|-----|-------|---------|--------|---------------|------------------------------------------|-------|-------------|-----|------------|-------------------------|-------------|-----|
| Rodriguez-Mateos, 2014 [130]  | 21  | <25   | 18 - 40 | Male   | UK            | Healthy                                  | NA    | NR          | No  | Controlled | Blueberry               | Acute study | 8   |
| Ruel, 2013 [131]              | 35  | >25   | NR      | Male   | Canada        | OW                                       | NA    | Non-Smokers | No  | Usual      | Cranberries             | 28          | 6   |
| Santhakumar, 2015 [132]       | 13  | <25   | 18 - 65 | Mixed  | Australia     | Healthy                                  | NR    | Non-Smokers | No  | NR         | Plum                    | 28          | 5.5 |
| Shema-Didi, 2014 [133]        | 101 | >25   | NR      | Mixed  | Israel        | Hemodialysis patients                    | NR    | NR          | Yes | NR         | Pomegranate             | 365         | 8   |
| Sivaprakasapillai, 2010 [134] | 27  | >25   | 25 - 80 | Mixed  | USA           | OW                                       | NR    | Non-smokers | No  | Usual      | Grape seed extract      | 28          | 7.5 |
| Spaak, 2006 [135]             | 13  | <25   | 24 - 47 | Mixed  | Canada        | Healthy                                  | NR    | Non-smokers | NR  | Controlled | Red wine                | Acute study | 6.5 |
| Spaccarotella, 2008 [136]     | 22  | Mixed | 45 - 75 | Male   | USA           | Healthy                                  | NA    | Non-smokers | NR  | Usual      | Walnuts                 | 56          | 3   |
| Stull, 2010 [137]             | 32  | >25   | 46 - 57 | Mixed  | USA           | OW                                       | NR    | NR          | NR  | Usual      | Blueberry               | 42          | 9   |
| Sumner, 2005 [138]            | 45  | >25   | NR      | Mixed  | USA           | Coronary heart disease                   | NR    | Non-smokers | Yes | NR         | Pomegranate             | 90          | 8   |
| Terauchi, 2014 [139]          | 96  | NR    | 40 - 60 | Female | Japan         | NR                                       | Mixed | NR          | NR  | NR         | Red grape seed          | 28          | 6   |
| Tey, 2013 [140]               | 107 | >25   | 18 - 65 | Mixed  | New Zealand   | Healthy                                  | NR    | Non-smokers | No  | Usual      | Hazelnuts               | 84          | 6.5 |
| Tomé-Carneiro, 2012 [141]     | 75  | >25   | 45 - 72 | Mixed  | Spain         | Patients with CV risk factor             | NR    | Mixed       | Yes | Usual      | Grapes                  | 184         | 9.5 |
| Tome-Carneiro, 2013 [142]     | 35  | >25   | NR      | Male   | Spain         | Hypertensive and coronary artery disease | NA    | NR          | Yes | Usual      | Red Grape extract       | 365         | 7   |
| Tsang, 2005 [143]             | 25  | <25   | 23 - 50 | Mixed  | UK            | Healthy                                  | NR    | Non-smokers | No  | Usual      | Red wine                | 14          | 5   |
| Tsang, 2012 [144]             | 28  | >25   | 40 - 65 | Mixed  | UK            | Healthy                                  | NR    | NR          | No  | Controlled | Pomegranate juice       | 28          | 8   |
| Umar, 2005 [145]              | 20  | NR    | 20 - 54 | Mixed  | France        | Healthy                                  | NR    | NR          | No  | NR         | Armanac <i>vs</i> vodka | 14          | 3   |
| Urquiaga, 2015 [146]          | 47  | NR    | 30 - 65 | Mixed  | Chile         | Metabolic syndrome                       | NR    | NR          | No  | Usual      | Red wine                | 112         | 6,5 |
| Vaisman, 2015 [147]           | 50  | >25   | 35 - 70 | Mixed  | Israel        | Healthy                                  | NR    | Mixed       | No  | Usual      | Red grapes              | 84          | 5   |
| Velliquette, 2015 [148]       | 49  | >25   | 40 - 60 | Mixed  | USA           | OW and obese                             | NR    | NR          | No  | Controlled | Raspberry and grape     | Berries     | 8.5 |
| Vidlar, 2010 [149]            | 42  | Mixed | 45 - 70 | Male   | Czec Republic | Mixed (prostate related problems)        | NA    | NR          | Yes | Usual      | Cranberry fruit         | 90          | 4   |

|                      |     |       |         |        |             |                                  |       |             |     |            |                           |             |     |
|----------------------|-----|-------|---------|--------|-------------|----------------------------------|-------|-------------|-----|------------|---------------------------|-------------|-----|
| Wang, 2012 [150]     | 90  | >25   | >45     | Mixed  | China       | Metabolic syndrome               | NR    | NR          | NR  | Usual      | Pistachio                 | 84          | 3.5 |
| Watson, 2015 [151]   | 36  | <25   | 18 - 34 | NR     | New Zealand | Healthy                          | NR    | Non-smokers | NR  | Usual      | Blackcurrant extracts     | Acute study | 8   |
| Whelan, 2004 [152]   | 14  | >25   | 30 - 70 | Male   | New Zealand | Coronary artery disease          | NA    | Non-smokers | Yes | Controlled | Wine                      | 21          | 6   |
| Wien, 2010 [153]     | 65  | >25   | 42 - 65 | Mixed  | USA         | OW                               | NR    | NR          | No  | Usual      | Almonds                   | 56          | 5   |
| Williams, 2004 [154] | 13  | NR    | 48 - 70 | Male   | New Zealand | Coronary artery disease          | NA    | Non-smokers | Yes | Controlled | Red wine                  | Acute study | 4   |
| Wu, 2014 [155]       | 40  | Mixed | 50 - 65 | Mixed  | Germany     | Healthy                          | Post- | Non-smokers | No  | Controlled | Walnuts                   | 56          | 4.5 |
| Wu, 2015 [156]       | 33  | NR    | ≥30     | Mixed  | USA         | Disease                          | NR    | Mixed       | Yes | NR         | Pomegranate               | 180         | 7   |
| Yubero, 2013 [157]   | 60  | >25   | 34 - 65 | Mixed  | Spain       | Healthy                          | NR    | NR          | NR  | Controlled | Red grape                 | 28          | 7   |
| Zern, 2005 [158]     | 44  | >25   | NR      | Female | USA         | Healthy                          | Pre-  | NR          | No  | Usual      | Red grape powder          | 28          | 8   |
| Zhang, 2015 [159]    | 74  | NR    | 25 - 65 | Mixed  | China       | Nonalcoholic fatty liver disease | NR    | NR          | No  | Usual      | Bilberry and blackcurrant | 84          | 9.5 |
| Zhu, 2013 [160]      | 150 | >25   | 40 - 65 | Mixed  | China       | Hypercholesterolemia             | NR    | Non-smokers | NR  | Usual      | Bilberry and blackcurrant | 150         | 7.5 |
| Zhu, 2011 [161]      | 150 | Mixed | 40 - 60 | Mixed  | China       | Hypercholesterolemia             | NR    | Non-smokers | NR  | Usual      | Bilberry and blackcurrant | 84          | 5   |
| Zunino, 2014 [162]   | 33  | >25   | 20 - 60 | Mixed  | USA         | OW                               | NR    | Non-smokers | No  | Usual      | Red grape                 | 21          | 6.5 |

N, Number of participants; BMI, Body mass index; CV, cardiovascular; NA; not applicable; NR, not reported; OW, overweight; NAFLD, Non-alcoholic fatty liver disease.

\*Risk of bias score: low risk (≥8 and ≤10), moderate risk (≥5 and <8), high risk (<5).
