# Supplementary material for: Meta-Analysis of the Effects of Foods and Derived Products Containing Ellagitannins and Anthocyanins on Cardiometabolic Biomarkers: Analysis of Factors Influencing Variability of the Individual Responses
Source: MDPI journal article supplement (doi:10.3390/ijms19030694), 2018-02-28
Supplement: s1 [file s1]

**Supplementary Table S9a.** Stratification by the health status of the study participants: influence on the effects estimations (SDM, DM) of the impact of ellagitannins (ETs: pomegranate, nuts) containing foods and products on a range of cardiovascular risk associated biomarkers.

| Health status                | ETs                        |                            |                            |                           |                             |                           |
|------------------------------|----------------------------|----------------------------|----------------------------|---------------------------|-----------------------------|---------------------------|
|                              | Healthy                    |                            | At risk                    |                           | Disease                     |                           |
|                              | SDM<br>(S, n, P)           | DM<br>(S, n, P)            | SDM<br>(S, n, P)           | DM<br>(S, n, P)           | SDM<br>(S, n, P)            | DM<br>(S, n, P)           |
| BMI<br>(Kg/m <sup>2</sup> )* | -0.12<br>(NS, 7, 0.00)     | -0.07<br>(NS, 5, 0.00)     | -0.09<br>(NS, 2, 0.00)     | -0.80<br>(NS, 2, 0.00)    | -0.01<br>(NS, 8, 18.81)     | -0.00<br>(NS, 7, 21.99)   |
| WC<br>(cm)                   | -2.47<br>(0.000, 1, 0.00)  | -2.60<br>(0.000, 1, 0.00)  | -0.15<br>(NS, 2, 0.00)     | -0.40<br>(NS, 1, 0.00)    | -0.57<br>(0.065, 4, 71.04)  | -0.71<br>(0.029, 4, 0.00) |
| T-C<br>(mmol/L)              | -0.21<br>(0.041, 10, 0.00) | -0.15<br>(0.028, 10, 0.00) | -0.30<br>(NS, 5, 78.78)    | -0.08<br>(0.000, 4, 0.00) | -0.10<br>(NS, 13, 0.00)     | -0.10<br>(NS, 12, 0.00)   |
| LDL-C<br>(mmol/L)            | -0.15<br>(NS, 8, 0.00)     | -0.10<br>(0.053, 8, 0.00)  | -0.55<br>(0.030, 5, 78.02) | -0.11<br>(0.000, 4, 0.00) | -0.04<br>(NS, 13, 0.00)     | -0.02<br>(NS, 12, 0.00)   |
| HDL-C<br>(mmol/L)            | -0.03<br>(NS, 8, 0.00)     | +0.01<br>(NS, 8, 0.00)     | +0.35<br>(0.030, 6, 40.88) | +0.04<br>(NS, 5, 0.00)    | +0.01<br>(NS, 9, 21.33)     | +0.04<br>(NS, 8, 0.00)    |
| TAGs<br>(mmol/L)             | -0.06<br>(NS, 9, 0.00)     | -0.05<br>(NS, 9, 0.00)     | -0.60<br>(NS, 5, 86.36)    | -0.11<br>(0.000, 4, 0.00) | -0.18<br>(0.088, 12, 22.56) | -0.08<br>(NS, 11, 0.00)   |
| SBP<br>(mm Hg)               | -0.04<br>(NS, 8, 50.01)    | -1.42<br>(NS, 5, 18.50)    | -0.40<br>(0.004, 5, 0.00)  | -1.15<br>(0.003, 4, 0.00) | -0.02<br>(NS, 8, 64.11)     | -1.14<br>(NS, 6, 69.17)   |
| DBP<br>(mm Hg)               | -0.24<br>(0.096, 7, 20.00) | -2.69<br>(NS, 6, 37.31)    | -0.06<br>(NS, 5, 50.24)    | -0.16<br>(NS, 4, 16.80)   | -0.11<br>(NS, 8, 48.53)     | -0.83<br>(NS, 8, 50.67)   |
| FMD<br>(%)                   | -<br>(NS, 1, 0.00)         | -<br>(NS, 1, 0.00)         | +0.55<br>(NS, 1, 0.00)     | +1.10<br>(NS, 1, 0.00)    | +0.66<br>(0.037, 2, 0.00)   | +0.25<br>(NS, 2, 42.43)   |
| Glucose<br>(mmol/L)          | -0.62<br>(0.023, 5, 75.59) | -0.23<br>(0.016, 5, 45.05) | -0.06<br>(NS, 3, 79.56)    | -0.20<br>(NS, 3, 71.74)   | +0.05<br>(NS, 8, 0.00)      | +0.05<br>(NS, 8, 0.00)    |
| Insulin<br>(mIU/L)           | -0.08<br>(NS, 6, 22.74)    | +0.18<br>(NS, 5, 40.11)    | -0.06<br>(NS, 3, 79.56)    | +0.65<br>(NS, 3, 71.74)   | -0.39<br>(NS, 3, 58.93)     | -0.76<br>(NS, 2, 0.00)    |
| Hb1Ac                        | -0.15<br>(NS, 1, 0.00)     | -0.07<br>(NS, 1, 0.00)     | -0.07<br>(NS, 1, 0.00)     | -0.15<br>(NS, 1, 0.00)    | +0.25<br>(NS, 4, 39.09)     | +0.11<br>(NS, 4, 29.40)   |
| HOMA-IR                      | +0.05<br>(NS, 2, 77.37)    | +0.33<br>(NS, 2, 81.41)    | -0.60<br>(NS, 2, 75.06)    | -1.05<br>(NS, 2, 0.00)    | +0.06<br>(NS, 3, 0.00)      | +0.13<br>(NS, 3, 0.00)    |

**Supplementary Table S9b.** Stratification by the health status of the study participants: influence on the effects estimations (SDM, DM) of the impact of anthocyanins (ANCs: berries, red grapes, red wine) containing foods and products on a range of cardiovascular risk associated biomarkers.

| Health status                | ANCs                        |                             |                             |                            |                             |                             |
|------------------------------|-----------------------------|-----------------------------|-----------------------------|----------------------------|-----------------------------|-----------------------------|
|                              | Healthy                     |                             | At risk                     |                            | Disease                     |                             |
|                              | SDM<br>(S, n, <i>P</i> )    | DM<br>(S, n, <i>P</i> )     | SDM<br>(S, n, <i>P</i> )    | DM<br>(S, n, <i>P</i> )    | SDM<br>(S, n, <i>P</i> )    | DM<br>(S, n, <i>P</i> )     |
| BMI<br>(Kg/m <sup>2</sup> )* | +0.01<br>(NS, 14, 0.00)     | -0.01<br>(NS, 14, 0.00)     | +0.04<br>(NS, 6, 0.00)      | +0.04<br>(NS, 6, 0.00)     | -0.06<br>(NS, 14, 0.00)     | -0.10<br>(NS, 13, 0.00)     |
| WC<br>(cm)                   | +0.02<br>(NS, 5, 0.00)      | +0.19<br>(NS, 5, 0.00)      | -0.24<br>(0.017, 7, 0.00)   | -1.72<br>(0.064, 7, 23.11) | +0.04<br>(NS, 3, 0.00)      | +0.37<br>(NS, 3, 0.00)      |
| T-C<br>(mmol/L)              | -0.12<br>(NS, 32, 24.30)    | -0.15<br>(0.003, 32, 3.20)  | -0.15<br>(NS, 13, 0.00)     | -0.07<br>(NS, 11, 0.00)    | -0.24<br>(0.042, 36, 77.92) | -0.16<br>(NS, 34, 88.49)    |
| LDL-C<br>(mmol/L)            | -0.03<br>(NS, 27, 0.00)     | -0.05<br>(NS, 27, 0.00)     | +0.16<br>(NS, 14, 69.31)    | +0.07<br>(NS, 13, 80.29)   | -0.19<br>(NS, 29, 79.49)    | -0.13<br>(NS, 27, 92.83)    |
| HDL-C<br>(mmol/L)            | +0.08<br>(NS, 30, 0.00)     | +0.03<br>(NS, 30, 0.00)     | +0.05<br>(NS, 14, 43.11)    | -0.04<br>(0.068, 11, 0.00) | +0.16<br>(NS, 32, 75.61)    | +0.05<br>(NS, 30, 83.15)    |
| TAGs<br>(mmol/L)             | +0.02<br>(NS, 25, 30.26)    | +0.03<br>(NS, 25, 32.59)    | -0.09<br>(NS, 12, 0.00)     | +0.01<br>(NS, 10, 80.39)   | +0.04<br>(NS, 34, 70.28)    | +0.06<br>(NS, 29, 86.85)    |
| SBP<br>(mm Hg)               | -0.26<br>(0.006, 28, 45.87) | -2.37<br>(0.004, 26, 0.00)  | -0.23<br>(0.062, 14, 31.85) | -1.24<br>(NS, 12, 0.00)    | -0.19<br>(0.001, 30, 0.00)  | -2.55<br>(0.001, 28, 0.00)  |
| DBP<br>(mm Hg)               | -0.24<br>(0.013, 28, 42.12) | -1.73<br>(0.004, 25, 9.27)  | -0.26<br>(0.011, 13, 9.34)  | -1.36<br>(0.021, 12, 0.00) | -0.13<br>(0.032, 35, 11.77) | -1.21<br>(0.011, 32, 18.27) |
| FMD<br>(%)                   | +0.18<br>(NS, 11, 64.83)    | +0.92<br>(0.049, 10, 56.59) | +0.29<br>(NS, 3, 25.15)     | +0.60<br>(NS, 3, 6.75)     | +0.12<br>(NS, 4, 89.23)     | +0.11<br>(NS, 4, 89.88)     |
| Glucose<br>(mmol/L)          | -0.12<br>(NS, 17, 43.73)    | -0.03<br>(NS, 15, 48.73)    | +0.05<br>(NS, 8, 26.42)     | +0.03<br>(NS, 6, 0.00)     | -0.03<br>(NS, 25, 48.76)    | +0.03<br>(NS, 23, 46.92)    |
| Insulin<br>(mIU/L)           | -0.51<br>(NS, 4, 86.07)     | -1.35<br>(NS, 4, 67.43)     | -0.05<br>(NS, 6, 74.89)     | +1.83<br>(NS, 4, 61.67)    | +0.21<br>(NS, 11, 66.70)    | -0.03<br>(NS, 5, 21.48)     |
| Hb1Ac                        | +0.50<br>(0.000, 1, 0.00)   | +5.00<br>(0.000, 1, 0.00)   | +0.04<br>(NS, 3, 0.00)      | +1.00<br>(NS, 2, 0.00)     | -0.21<br>(NS, 10, 83.61)    | -0.02<br>(NS, 10, 79.07)    |
| HOMA-IR                      | -0.30<br>(NS, 1, 0.00)      | -0.12<br>(NS, 1, 0.00)      | -0.28<br>(NS, 2, 65.92)     | +0.76<br>(NS, 1, 0.00)     | +0.19<br>(NS, 8, 71.26)     | -0.16<br>(NS, 6, 61.05)     |

BMI: Body Mass Index; WC: Waist Circumference; T-C: Total Cholesterol; LDL-C: Low density Lipoprotein Cholesterol; HDL-C: High Density Lipoprotein Cholesterol; TAGs: Triacylglycerols; SBP: Systolic Blood Pressure; DBP: Diastolic Blood Pressure; FMD: Flow Mediated Dilation; Hb1Ac: Glycated Haemoglobin; HOMA-IR: Homeostatic Model Assessment of Insulin Resistance; SDM: standardized difference in means; DM: Difference in means; n: total number of studies included in the analysis; *P*: heterogeneity index; Q-value: between-categories Q statistic. \*: Units refer to the size effect estimation (DM); S: Significance of the analysis; NS: not significant, *P*-values < 0.05 were significant and indicated. *P*-values: 0.05 ≤ *P*-value < 0.1 were considered marginally significant and are also indicated.
